# Supplementary material for: The reactions of 2-ethoxymethylidene-3-oxo esters and their analogues with 5-aminotetrazole as a way to novel azaheterocycles
Source: PubMed Central journal article supplement (PMC4419505; doi:10.3762/bjoc.11.44), 2015-03-23
Supplement: Beilstein_J_Org_Chem-11-385-s001.pdf [file Beilstein_J_Org_Chem-11-385-s001.pdf]

**Supporting Information**  
for  
**The reactions of 2-ethoxymethylidene-3-oxo esters  
and their analogues with 5-aminotetrazole as a way  
to novel azaheterocycles**

Marina V. Goryaeva\*, Yanina V. Burgart, Marina A. Ezhikova, Mikhail I. Kodess and  
Viktor I. Saloutin

Address: Postovsky Institute of Organic Synthesis, Ural Branch, Russian Academy of  
Sciences, 22 S. Kovalevskoy St., 620137 Ekaterinburg, Russia

Email: Marina V. Goryaeva\* - pmv@ios.uran.ru

\* Corresponding author

**Experimental section and the copies of all  $^1\text{H}$ ,  $^{13}\text{C}$ , and  $^{19}\text{F}$  NMR  
spectra of all new compounds.**

Table of contents:

- Pages S2–S10: Detailed experimental procedures and spectroscopic data for all  
synthesized compounds.
- Page S12: References
- Pages S13–S44: Copies of  $^1\text{H}$ ,  $^{19}\text{F}$  and  $^{13}\text{C}$  NMR spectra of new compounds.

## Detailed experimental procedures and spectroscopic data for all synthesized compounds.

### Experimental

General: Melting points were measured in open capillaries on a Stuart SMP3 melting point apparatus. The diffuse reflection spectra (DRIFT) were recorded on a Perkin Elmer Spectrum One Fourier transform infrared spectrometer, the attenuated total reflectance spectra (ATR) were registered on Nicolet 6700 FT-IR spectrometer in the range from 400 to 4000  $\text{cm}^{-1}$ . The  $^1\text{H}$ ,  $^{19}\text{F}$  and  $^{13}\text{C}$  NMR spectra were recorded on Bruker DRX-400 and AVANCE-500 instruments using  $\text{Me}_4\text{Si}$  as an internal standard for  $^1\text{H}$ , and  $\text{C}_6\text{F}_6$  for  $^{19}\text{F}$ . The  $^{13}\text{C}$  chemical shifts were measured from the solvent signal  $\text{DMSO-}d_6$  ( $\delta_{\text{C}}$  39.5 ppm) or  $\text{CDCl}_3$  ( $\delta_{\text{C}}$  77.0 ppm). All signals in the  $^1\text{H}$  and  $^{13}\text{C}$  NMR spectra were assigned on the basis of 2D  $^1\text{H}$ ,  $^{13}\text{C}$  HSQC and HMBC experiments. Mass spectra of **2a,b,c** and **4b** were obtained using GC-MS Trace GC Ultra DSQ II with capillary column Termo TR-5ms (30 m x 0.25 mm x 0.25  $\mu\text{m}$ ), mass spectra of compounds **3**, **5-7**, **9-11**, **14** were performed using a Shimadzu GCMS-QP2010 Ultra. The microanalyses were carried out on a Perkin Elmer PE 2400 series II elemental analyzer. The column chromatography was performed on Merck silica gel 60 (0.063–0.200 mm).

Ethyl 2-ethoxymethylidene-3-oxo-3-(polyfluoroalkyl)propionates (**1a,b**) [1], ethyl 2-ethoxymethylideneacetoacetate (**1c**) and ethyl 2-ethoxymethylideneacyanoacetate (**1f**) [2], ethyl 2-benzoyl-3-ethoxyprop-2-enoate (**1d**) [3] were obtained according to the literature procedures. Diethyl 2-ethoxymethylidenemalonate (**1e**) and 5-aminotetrazole monohydrate are commercially available (purchased from Alfa Aesar and Sigma-Aldrich respectively).

**General procedure for the synthesis of compounds 2a-c:** A mixture of the corresponding ester **1a-c** (3 mmol) and 5-aminotetrazole (0.31 g, 3 mmol) in trifluoroethanol (20 ml) was refluxed for 32-38 h. After the completion of the reaction (TLC monitoring), the reaction mixture was evaporated to dryness under reduced pressure, the residue was purified by column chromatography (chloroform as an eluent) to afford compounds **2a-c**.

**Ethyl 2-azido-4-(trifluoromethyl)pyrimidine-5-carboxylate (2a):** Yellow oil; yield 0.54 g (69%); ATR ( $\text{cm}^{-1}$ )  $\nu$  2988 (C–H), 2144 (N=N=N), 1731 (C=O), 1581, 1551 (C=C–C=N), 1195–1084 (C-F);  $^1\text{H}$  NMR (500 MHz,  $\text{CDCl}_3$ )  $\delta$  1.41 (t,  $J = 7.1$  Hz, 3H,  $\text{CH}_3$ ), 4.44 (q,  $J = 7.1$  Hz, 2H,  $\text{OCH}_2$ ), 9.13 (s, 1H, H-6);  $^{19}\text{F}$  NMR (470 MHz,  $\text{CDCl}_3$ )  $\delta$  95.34 (s,  $\text{CF}_3$ );  $^{13}\text{C}$  NMR (126 MHz,  $\text{CDCl}_3$ )  $\delta$  13.81 ( $\text{CH}_3$ ), 62.90 ( $\text{OCH}_2$ ), 119.57 (q,  $^1J_{\text{C-F}} = 276.6$  Hz,  $\text{CF}_3$ ), 119.67 (q,  $^3J_{\text{C-F}} = 0.9$  Hz, C-5), 155.79 (q,  $^2J_{\text{C-F}} = 37.8$  Hz, C-4), 162.54 (COO), 162.97 (C-6), 163.89 (q,  $^4J_{\text{C-F}} = 1.2$  Hz, C-2); MS (EI)  $m/z$  (%): 261 ( $\text{M}^+$ , 20), 233 (37), 216 (33), 188 (22), 162 (17), 148 (6), 133 (10), 120 (17), 106 (11), 92 (34), 69 (81), 53 (28), 29 (100); Anal calcd for  $\text{C}_8\text{H}_6\text{F}_3\text{N}_5\text{O}_2$ : C, 36.79; H, 2.32; N, 26.82; found: C, 36.83; H, 2.31; N, 26.81.

**Ethyl 2-azido-4-(1,1,2,2-tetrafluoroethyl)pyrimidine-5-carboxylate (2b):** Yellow oil, yield 0.53 g (60%); ATR ( $\text{cm}^{-1}$ )  $\nu$  2989, 2940 (C–H), 2146 (N=N=N), 1732 (C=O), 1581, 1547 (C=C–C=N), 1130–1102 (C-F);  $^1\text{H}$  NMR (400 MHz,  $\text{CDCl}_3$ )  $\delta$  1.41 (t,  $J = 7.1$  Hz, 3H,  $\text{CH}_3$ ), 4.44 (q,  $J = 7.1$  Hz, 2H,  $\text{OCH}_2$ ), 6.61 (tt,  $J_{\text{H-F}} = 52.9, 5.7$  Hz, 1H,  $(\text{CF}_2)_2\text{H}$ ), 9.03 (s, 1H, H-6);  $^{19}\text{F}$  NMR (375 MHz,  $\text{CDCl}_3$ )  $\delta$  23.76 (dm,  $J_{\text{F-H}} = 52.9$  Hz, 2F,  $\text{CF}_2\text{H}$ ), 44.54 (m, 2F,  $\text{CF}_2$ );  $^{13}\text{C}$  NMR (126 MHz,  $\text{CDCl}_3$ )  $\delta$  13.89 ( $\text{CH}_3$ ), 63.02 ( $\text{OCH}_2$ ), 109.38 (tt,  $J_{\text{C-F}} = 252.0, 31.3$  Hz,  $\text{CF}_2\text{H}$ ) 112.19 (tt,  $J_{\text{C-F}} = 255.1, 26.7$  Hz,  $\text{CF}_2$ ), 121.07 (C-5), 158.17 (t,  $^2J_{\text{C-F}} = 28.4$  Hz, C-4), 162.17 (s, C-6), 163.31 (COO), 163.39 (t,  $^4J_{\text{C-F}} = 1.5$  Hz, C-2); MS (EI)  $m/z$  (%): 293 ( $\text{M}^+$ , 20), 265 (17), 248 (36), 220 (23), 209 (14), 171 (9), 142

(26), 120 (21), 101 (64), 92 (46), 53 (34), 51 (58), 29 (100); Anal; calcd for C<sub>9</sub>H<sub>7</sub>F<sub>4</sub>N<sub>5</sub>O<sub>2</sub>: C, 36.87; H, 2.41; N, 23.89; found: C, 36.81; H, 2.40; N, 23.85.

**Ethyl 2-azido-4-methylpyrimidine-5-carboxylate (2c):** Yellow oil, yield 0.29 g (46%); ATR (cm<sup>-1</sup>)  $\nu$  2984 (C–H), 2144 (N=N=N), 1725 (C=O), 1576, 1544 (C=C–C=N); <sup>1</sup>H NMR (500 MHz, CDCl<sub>3</sub>)  $\delta$  1.41 (t, *J* = 7.1 Hz, 3H, CH<sub>3</sub>), 2.80 (s, Me), 4.40 (q, *J* = 7.1 Hz, 2H, OCH<sub>2</sub>), 9.03 (s, 1H, H-6); <sup>13</sup>C NMR (126 MHz, CDCl<sub>3</sub>)  $\delta$  14.16 (CH<sub>3</sub>), 24.42 (CH<sub>3</sub>C-4), 61.48 (OCH<sub>2</sub>), 119.30 (C-5), 161.31 (C-6), 163.49 (C-2), 164.21 (COO), 171.87 (C-4); MS (EI) *m/z* (%): 207 (M<sup>+</sup>, 53), 162 (31), 134 (43), 109 (60), 67 (100), 53 (57), 43 (91), 29 (89); Anal calcd for C<sub>8</sub>H<sub>9</sub>N<sub>5</sub>O<sub>2</sub>: C, 46.38; H, 4.38; N, 33.80; found: C, 46.34; H, 4.22; N, 33.83.

**Ethyl 7-[[2-azido-5-(ethoxycarbonyl)pyrimidin-4-yl]methyl]-5-methyl-4,7-dihydro-tetrazolo[1,5-*a*]pyrimidine-6-carboxylate (3):**

**Method A.** A mixture of ethyl 2-ethoxymethyleneacetoacetate (**1c**) (0.56 g, 3 mmol) and 5-aminotetrazole (0.31 g, 3 mmol) in EtOH (20 ml) was stirred at room temperature for 9 days. After the completion of the reaction (TLC monitoring), the reaction mixture was evaporated to dryness under reduced pressure, the residue was washed with diethyl ether and crystallized from hexane to give 0.60 g (48%) of compound **3**. **Method B.** Oily azidopyrimidine **2c** (0.30 g, 0.7 mmol) solidified at the room temperature for 10-12 days. Then the resulting solid was washed with diethyl ether and crystallized from hexane to afford 0.26 g (86%) of compound **3** as yellow powder, mp 145–146 °C; DRIFT (cm<sup>-1</sup>)  $\nu$  3325 (N–H), 2982 (C–H), 2137 (N=N=N), 1705 (C=O), 1577, 1541 (C=C–C=N); <sup>1</sup>H NMR (500 MHz, CDCl<sub>3</sub>)  $\delta$  1.37 (m, 6H, CH<sub>3</sub> and CH<sub>3</sub>'), 2.55 (s, 3H, Me), 3.47 (dd, *J* = 13.4, 3.9 Hz, 1H, CH<sup>B</sup>), 4.16 (dd, *J* = 13.4, 7.0 Hz, 1H, CH<sup>A</sup>), 4.26 (q, *J* = 7.2 Hz, 2H, OCH<sub>2</sub>), 4.24–4.35 (m, 2H, OCH<sub>2</sub>), 6.34 (dd, *J* = 7.0, 3.9 Hz, 1H, H-7), 9.02 (s, 1H, H-6'), 10.72 (s, 1H, NH); <sup>13</sup>C NMR (126 MHz, CDCl<sub>3</sub>)  $\delta$  14.10 (CH<sub>3</sub>), 14.24 (CH<sub>3</sub>), 19.42 (CH<sub>3</sub>C-5), 41.01 (CH<sub>2</sub>), 55.28 (C-7), 60.73 (OCH<sub>2</sub>), 61.84 (OCH<sub>2</sub>'), 97.77 (C-6), 120.17 (C-5'),

147.83 (C-5), 149.71 (C-3a), 161.79 (C-6'), 163.41 (C-2'), 163.69 (COO), 164.71 (COO), 169.09 (C-4'); MS (EI) m/z (%): 207 ([M / 2]<sup>+</sup>, 69), 179 (3), 162 (27), 134 (48), 109 (53), 80 (45), 67 (73), 43 (100); Anal calcd for C<sub>16</sub>H<sub>18</sub>N<sub>10</sub>O<sub>4</sub>: C, 46.38; H, 4.38; N, 33.80; found: C, 46.35; H, 4.39; N, 33.76.

**General procedures for the synthesis of compounds 4a,b: Method A.** A mixture of the corresponding ester **1a,b** (3 mmol), 5-aminotetrazole (0.31 g, 3 mmol) and sodium acetate trihydrate (0.20 g, 1.5 mmol) in 1,4-dioxane (25 ml) was refluxed for 16-18 h. After the completion of the reaction (TLC monitoring), the reaction mixture was poured into cool water (100 ml). The resulting precipitate was filtered off, washed with diethyl ether and crystallized from ethanol to give compounds **4a,b**. The filtrate and washing solutions after purification of compound 4a were used to obtain compound **5**. **Method B.** A mixture of the corresponding ester 1a,b (3 mmol), guanidine carbonate (0.27 g, 3 mmol) and sodium acetate trihydrate (0.40 g, 3 mmol) in dimethylformamide (15 ml) was stirred under heating (80 °C) for 24–26 h. After the completion of the reaction (TLC monitoring), the reaction mixture was poured into cool water (200 ml). The resulting precipitate was filtered off and crystallized from ethanol to afford compounds **4a,b**.

**Ethyl 2-amino-4-(trifluoromethyl)pyrimidine-5-carboxylate (4a):** Yellow powder, yield (method A) 0.27 g (38%), (method B) 0.42 g (60%), mp 178–179 °C. <sup>1</sup>H NMR spectrum is identical to that published in [4].

**Ethyl 2-amino-4-(1,1,2,2-tetrafluoroethyl)pyrimidine-5-carboxylate (4b):** Yellow powder; yields (method A) 0.35 g (44%), (method B) 0.55 g (68%); mp 141–142 °C; DRIFT (cm<sup>-1</sup>) ν 3372, 3336, 3212 (NH, NH<sub>2</sub>), 1716 (C=O), 1666, 1590, 1543 (C=C–C=N), 1179–1069 (C–F); <sup>1</sup>H NMR (500 MHz, CDCl<sub>3</sub>) δ 1.39 (t, *J* = 7.2 Hz, 3H, CH<sub>3</sub>), 4.37 (q, *J* = 7.2 Hz, 2H, OCH<sub>2</sub>), 5.80 (br. s, 2H, NH<sub>2</sub>), 6.68 (tt, *J*<sub>H-F</sub> = 53.4, 5.8 Hz, 1H, (CF<sub>2</sub>)<sub>2</sub>H), 8.83 (s, 1H, H-6); <sup>19</sup>F NMR (470 MHz, CDCl<sub>3</sub>) δ 23.46 (dm, *J*<sub>F-H</sub> = 53.4 Hz, 2F, CF<sub>2</sub>H), 43.43 (m, 2F, CF<sub>2</sub>); <sup>13</sup>C NMR (126 MHz, CDCl<sub>3</sub>) δ 14.01 (CH<sub>3</sub>), 62.08 (OCH<sub>2</sub>),

109.71 (tt,  $J_{C-F} = 251.6, 30.8$  Hz,  $CF_2H$ ), 112.52 (tt,  $J_{C-F} = 254.4, 26.1$  Hz,  $CF_2$ ), 114.99 (C-5), 158.24 (t,  $^2J_{C-F} = 26.9$  Hz, C-4), 162.32 (C-6), 162.80 (unres. m, C-2), 164.14 (COO); MS (EI)  $m/z$  (%): 267 ( $M^+$ , 16), 239 (13), 222 (100), 202 (11), 171 (11), 120 (10), 101 (4), 93 (7), 68 (7), 53 (6), 29 (5); Anal calcd for  $C_9H_9F_4N_3O_2$ : 40.46; H, 3.40; N, 15.73; found: C, 40.52; H, 3.41; N, 15.75.

**Ethyl 2-(1*H*-tetrazol-5-ylamino)-4-(trifluoromethyl)pyrimidine-5-carboxylate (5):**

**Method A.** The filtrates after purification of compound **4a** (method A) were combined and evaporated. The resulting precipitate was washed with diethyl ether and crystallized from ethanol to give 0.14 g (15%) of compound **5**. **Method B.** A mixture of 2-azidopyrimidine **2c** (0.5 mmol), 5-aminotetrazole (0.05 g, 0.5 mmol) and triethylamine (3 drops) in 1,4-dioxane (15 ml) was refluxed for 5 days. After the completion of the reaction (TLC monitoring), the reaction mixture was poured into cool water (200 ml). The resulting precipitate was filtered off and crystallized from ethanol to give 0.13 g (89%) of compound **5** as a white powder; mp 216–218 °C; DRIFT ( $cm^{-1}$ )  $\nu$  3252, 3170 (NH), 2967, 2931 (C–H), 1744 (C=O), 1629, 1583, 1551 (C=C–C=N), 1205–1142 (C–F);  $^1H$  NMR (400 MHz,  $DMSO-d_6$ )  $\delta$  1.33 (t,  $J = 7.1$  Hz, 3H,  $CH_3$ ), 4.36 (q,  $J = 7.1$  Hz, 2H,  $OCH_2$ ), 9.12 (s, 1H, H-6), 12.50 (br. s, 1H, NH), 15.81 (br. s, 1H, NH-1');  $^{19}F$  NMR (375 MHz,  $DMSO-d_6$ )  $\delta$  97.20 (s,  $CF_3$ );  $^{13}C$  NMR (126 MHz,  $DMSO-d_6$ )  $\delta$  13.71 ( $CH_3$ ), 61.98 ( $OCH_2$ ), 115.89 (C-5), 119.85 (q,  $^1J_{C-F} = 276.4$  Hz,  $CF_3$ ), 150.78 (br. s, C-5'), 154.00 (q,  $^2J_{C-F} = 36.4$  Hz, C4), 158.36 (C-2), 162.37 (C-6), 162.53 (COO); MS (EI)  $m/z$  (%): 303 ( $M^+$ , 8), 275 (3), 258 (16), 247 (22), 220 (100), 192 (34), 152 (22), 124 (18), 77 (22), 69 (14), 53 (14), 45 (8); Anal. Calcd for  $C_9H_8F_3N_7O_2$ : C, 35.65; H, 2.66; N, 32.34; found: C, 35.62; H, 2.60; N, 32.25.

**General procedures for the synthesis of compounds 6, 7: Method A.** A mixture of diethyl 2-ethoxymethylenemalonate (**1e**) (0.65 g, 3 mmol), 5-aminotetrazole (0.31 g, 3 mmol) and triethylamine (3 drops) in ethanol (25 ml) was refluxed for 12 h. After the

completion of the reaction (TLC monitoring), the reaction mixture was evaporated to dryness under reduced pressure, the residue was triturated with chloroform and filtered off. The precipitate was crystallized from ethanol to give compound **7**. The filtrate was evaporated, and the residue was crystallized from acetonitrile to yield compound **6**.

**Method B.** A mixture of diethyl 2-ethoxymethylenemalonate (**1e**) (0.65 g, 3 mmol), 5-aminotetrazole (0.26 g, 3 mmol) and triethylamine (3 drops) in ethanol (25 ml) was refluxed for 48 h. After the completion of the reaction (TLC monitoring), the reaction mixture was evaporated to dryness under reduced pressure, the residue was crystallized from ethanol to give 0.48 g (76%) of compound **7**.

**Method C.** The compound **6** (0.13 g, 0.5 mmol) in ethanol (15 ml) was refluxed for 36 h. After the completion of the reaction (TLC monitoring), the reaction mixture was cooled in refrigerator, the precipitate was filtered off to give **7**.

**Diethyl [(1*H*-tetrazol-5-ylamino)methylidene]propanedioate (6):** White powder; yield (method A) 0.41 g (54%); mp 162–164 °C; DRIFT (cm<sup>-1</sup>)  $\nu$  3300, 3233 (NH), 2996, 2942 (C–H), 1702, 1649 (C=O), 1605, 1567 (C=C, C=N); <sup>1</sup>H NMR (400 MHz, DMSO-*d*<sub>6</sub>)  $\delta$  1.24 (t, *J* = 7.1 Hz, 3H, CH<sub>3</sub>), 1.27 (t, *J* = 7.1 Hz, 3H, CH<sub>3</sub>), 4.16 (q, *J* = 7.1 Hz, 2H, OCH<sub>2</sub>), 4.24 (q, *J* = 7.1 Hz, 2H, OCH<sub>2</sub>), 8.44 (d, *J* = 13.0 Hz, 1H, CH), 11.01 (d, *J* = 13.0 Hz, 1H, NH); <sup>13</sup>C NMR (126 MHz, DMSO-*d*<sub>6</sub>)  $\delta$  14.02 (CH<sub>3</sub>), 14.13 (CH<sub>3</sub>), 60.05 (OCH<sub>2</sub>), 60.34 (OCH<sub>2</sub>), 98.43(C-2), 148.70 (CH), 155.57 (br. s, C-5'), 164.02 (COO), 166.05 (COO); MS (EI) *m/z* (%): 255 (M<sup>+</sup>, 12), 227 (8), 210 (21), 198 (76), 152 (100), 124 (62), 85 (13), 53 (86); Anal calcd for C<sub>9</sub>H<sub>13</sub>N<sub>5</sub>O<sub>4</sub>: C, 42.35; H, 5.13; N, 27.44; found: C, 42.27; H, 5.12; N, 27.38.

**Ethyl 7-hydroxytetrazolo[1,5-*a*]pyrimidine-6-carboxylate (7):** White powder; yield (method A) 0.19 g (30%), (method B) 0.48 g (76%), (method C) 0.10 g (95%); mp 236–238 °C; DRIFT (cm<sup>-1</sup>)  $\nu$  3419 (O–H), 1715 (C=O), 1633, 1534 (C=C–C=N); <sup>1</sup>H NMR (500 MHz, DMSO-*d*<sub>6</sub>)  $\delta$  1.28 (t, *J* = 7.1 Hz, 3H, CH<sub>3</sub>), 3.36 (s, OH + H<sub>2</sub>O solv.), 4.21 (q,

$J = 7.1$  Hz, 2H, OCH<sub>2</sub>), 8.71 (s, 1H, H-5); <sup>13</sup>C NMR (126 MHz, DMSO-*d*<sub>6</sub>)  $\delta$  14.39 (qt,  $J = 126.6$ , 2.6 Hz, CH<sub>3</sub>), 59.14 (tq,  $J = 147.1$ , 4.5 Hz, OCH<sub>2</sub>), 98.15 (d,  $J = 6.2$  Hz, C-6), 153.48 (d, <sup>3</sup> $J_{\text{C7-H5}} = 7.6$  Hz, C-7), 158.63 (d, <sup>3</sup> $J_{\text{C3a-H5}} = 16.6$  Hz, C-3a), 160.08 (d,  $J = 177.6$  Hz, C-5), 165.39 (q,  $J = 3.2$  Hz, COO); MS (EI)  $m/z$ : 209 (M<sup>+</sup>, 9), 192 (30), 165 (40), 137 (70), 124 (28), 109 (36), 95 (22), 81 (28), 69 (46), 53 (100), 44 (38), 43 (33). Anal calcd for C<sub>7</sub>H<sub>7</sub>N<sub>5</sub>O<sub>3</sub>: C, 40.20; H, 3.37; N, 33.48; found: C, 39.99; H, 3.39; N, 33.30.

**General procedure for the synthesis of compounds 9, 10:** A mixture of ethyl 2-benzoyl-3-ethoxyprop-2-enoate (**1d**) (0.65 g, 3 mmol) and 5-aminotetrazole (0.31 g, 3 mmol) in trifluoroethanol (25 ml) was refluxed for 48 h. After the completion of the reaction (TLC monitoring), the reaction mixture was evaporated to dryness under reduced pressure, the residue was subjected to column chromatography (chloroform as an eluent) to afford ester **8** as the fastest eluting substance, then compound **9**, and compound **10** as a slow eluting substance. The fraction containing compound **9** was evaporated to dryness, the residue was washed with diethyl ether to give compound **9**. The last fraction containing compound **10** was evaporated to dryness, the residue was crystallized from acetonitrile to afford compound **10**.

**Ethyl 2-benzoyl-3-(1*H*-tetrazol-5-ylamino)prop-2-enoate (9):** White powder; yield 0.07 g (8%); mp 122-124 °C; DRIFT (cm<sup>-1</sup>)  $\nu$  3493, 3007 (N-H, O-H), 3056, 3031, 2980 (C-H), 1663 (C=O, br), 1612, 1584 (C=C); <sup>1</sup>H NMR (500 MHz, DMSO-*d*<sub>6</sub>)  $\delta$  *E* (60%): 0.97 (t,  $J = 7.1$  Hz, 3H, CH<sub>3</sub>), 3.97 (q,  $J = 7.1$  Hz, 2H, OCH<sub>2</sub>), 7.39-7.58 (m, 5H, Ph), 8.73 (d,  $J = 13.6$  Hz, 1H, H-3), 11.86 (d,  $J = 13.6$  Hz, 1H, NH), *Z* (40%): 0.92 (t,  $J = 7.2$  Hz, 3H, CH<sub>3</sub>), 4.03 (q,  $J = 7.2$  Hz, 2H, OCH<sub>2</sub>), 7.39-7.58 (m, 5H, Ph), 8.41 (d,  $J = 13.8$  Hz, 1H, H-3), 10.67 (d,  $J = 13.8$  Hz, 1H, NH); <sup>13</sup>C NMR (126 MHz, DMSO-*d*<sub>6</sub>)  $\delta$  *E*: 13.78 (CH<sub>3</sub>), 59.37 (OCH<sub>2</sub>), 101.28 (C-2), 127.16 (C<sub>o</sub>), 127.58 (C<sub>m</sub>), 130.31 (C<sub>p</sub>), 141.49 (C<sub>i</sub>), 152.18 (C-3), 159.25 (C-5'), 166.59 (COO), 195.22(CO), *Z*: 13.63 (CH<sub>3</sub>), 59.36 (OCH<sub>2</sub>),



101.76 (C-2), 127.86(Co), 128.07 (Cm), 130.99 (Cp), 140.74 (Ci), 151.95 (C-3), 159.44 (C-5'), 166.87 (COO), 192.37 (CO); MS (EI) m/z (%): 269 ([M-H<sub>2</sub>O]<sup>+</sup>, 7), 241 (1), 213 (2), 196 (2), 129 (6), 105 (62), 77 (24), 45 (100); Anal calcd for C<sub>13</sub>H<sub>13</sub>N<sub>5</sub>O<sub>3</sub>: C, 54.35; H, 4.56; N, 24.38; found: C, 54.30; H, 4.55; N, 24.40.

**Ethyl 7-(1-ethoxy-1,3-dioxo-3-phenylpropan-2-yl)-5-phenyl-4,7-dihydro-1H-tetrazolo[1,5-a]pyrimidine-6-carboxylate (10):** White crystals; yield 0.18 g (26%); mp 109-111 °C; DRIFT (cm<sup>-1</sup>) ν 3202, 3151 (O-H), 3073, 3034, 2980 (C-H), 1747, 1674 (C=O), 1637, 1568 (C=C); <sup>1</sup>H NMR (500 MHz, CDCl<sub>3</sub>) δ 0.88 (t, *J* = 7.2 Hz, 3H, CH<sub>3</sub>), 1.15 (t, *J* = 7.2 Hz, 3H, CH<sub>3</sub>'), 3.97 (dq, *J* = 10.7, 7.2 Hz, 1H, OCH<sup>B</sup>), 4.01 (dq, *J* = 10.7, 7.2 Hz, 1H, OCH<sup>A</sup>), 4.11 (q, *J* = 7.2 Hz, 2H, OCH<sub>2</sub>'), 5.28 (d, *J* = 2.8 Hz, 1H, H-2'), 6.47 (d, *J* = 2.8 Hz, 1H, H-7), 7.39 (m, 2H, Ho), 7.45–7.53 (m, 3H, Hm and Hp), 7.55 (m, 2H, Hm'), 7.63 (m, 1H, Hp'), 8.18 (m, 2H, Ho'), 10.48 (s, 1H, NH); <sup>13</sup>C NMR (126 MHz, CDCl<sub>3</sub>) δ 13.42 (CH<sub>3</sub>'), 13.89 (CH<sub>3</sub>), 55.74 (C-7), 59.03 (C-2'), 60.79 (OCH<sub>2</sub>'), 61.69 (OCH<sub>2</sub>), 95.60 (C-6), 128.05 (Co), 128.55 (Cm), 128.98 (Co' and Cm'), 130.40 (Cp), 133.73 (Cp'), 134.53 (Ci), 135.62 (Ci'), 149.74 (C-3a), 150.39 (C-5), 165.66 (COO), 167.53 (C-1'), 192.91 (C-3'); MS (EI) m/z: 269 ([M-192]<sup>+</sup>, 10), 241 (1), 213 (2), 192 ([PhOCCH<sub>2</sub>CO<sub>2</sub>Et]<sup>+</sup>, 8), 129 (4), 105 (100), 77 (30); Anal calcd for C<sub>24</sub>H<sub>23</sub>N<sub>5</sub>O<sub>5</sub>: C, 62.46; H, 5.02; N, 15.18; found: C, 62.18; H, 5.00; N, 15.11.

**5-[2,6-Diamino-3,5-bis(ethoxycarbonyl)pyridinium-1-yl]tetrazol-1-ide (11):**

**Method A.** A mixture of ethyl 2-ethoxymethylenecyanoacetate (**1f**) (0.51 g, 3 mmol), 5-aminotetrazole (0.31 g, 3 mmol) and triethylamine (0.5 ml) in ethanol (or trifluoroethanol) (25 ml) was refluxed for 40 min. After the completion of the reaction (TLC monitoring), the reaction mixture was evaporated to dryness under reduced pressure; the resulting precipitate was filtered off and crystallized from acetonitrile to give 0.42 g (44%) (in EtOH), 0.40 g (42%) (in TFE) compound **11**.

**Method B.** A mixture of ethyl 2-ethoxymethylenecyanoacetate (**1f**) (0.17 g, 1 mmol), ethyl cyanoacetate (**12**) (0.11 g, 1 mmol), 5-aminotetrazole (0.09 g, 1 mmol) and triethylamine (0.2 ml) in ethanol (20 ml) was refluxed for 50 min. After the completion of the reaction (TLC monitoring), the reaction mixture was evaporated to dryness under reduced pressure; the resulting precipitate was filtered off and crystallized from acetonitrile to afford compound **11** as white crystals, mp 228–230 °C; yield 0.29 g (90%); DRIFT ( $\text{cm}^{-1}$ )  $\nu$  3292, 3238 ( $\text{NH}_2$ ), 1699 ( $\text{C}=\text{O}$ ), 1649–1587 ( $\text{C}=\text{C}$ ,  $\text{C}=\text{N}$ );  $^1\text{H}$  NMR (500 MHz,  $\text{DMSO-}d_6$ )  $\delta$  1.33 (t,  $J = 7.1$  Hz, 6H,  $\text{CH}_3$ ), 4.34 (q,  $J = 7.1$  Hz, 4H,  $\text{OCH}_2$ ), 8.24 (s, 2H, NH), 8.77 (s, 1H, H-4), 9.33 (s, 2H, NH);  $^{13}\text{C}$  NMR (126 MHz,  $\text{DMSO-}d_6$ )  $\delta$  14.03 ( $\text{CH}_3$ ), 61.61 ( $\text{OCH}_2$ ), 95.49 (C-3, 5), 146.41 (C-4), 151.82 (C-5'), 154.92 (C-2, 6), 164.51 (COO); MS (EI)  $m/z$  (%): 321 ( $\text{M}^+$ , 31), 276 (12), 265 (37), 236 (54), 208 (31), 190 (100), 146 (92), 120 (52), 107 (20), 91 (32), 79 (21), 64 (37), 52 (43); Anal calcd for  $\text{C}_{12}\text{H}_{15}\text{N}_7\text{O}_4$ : C, 44.86; H, 4.71; N, 30.52; found: C, 44.75; H, 4.61; N, 30.60.

**Diethyl 2,4-dicyanopent-2-enedioate monohydrate (14).** A mixture of ethyl 2-ethoxymethylenecyanoacetate (**1f**) (0.17 g, 1 mmol), ethyl cyanoacetate (**12**) (0.11 g, 1 mmol) and triethylamine (0.2 ml) in ethanol (15 ml) was refluxed for 60 min. After the completion of the reaction (TLC monitoring), the reaction mixture was evaporated, the resulting precipitate was washed with chloroform and dried to give 0.21 g (89%) of compound **14** as a white powder; mp 260–262 °C; DRIFT ( $\text{cm}^{-1}$ )  $\nu$  3502 ( $\text{H}_2\text{O}$ ), 2982, 2934 (C-H), 2213, 2189 ( $\text{C}\equiv\text{N}$ ), 1678, 1662 ( $\text{C}=\text{O}$ ), 1532 ( $\text{C}=\text{C}$ );  $^1\text{H}$  NMR (500 MHz,  $\text{DMSO-}d_6$ )  $\delta$  1.17 (t,  $J = 7.1$  Hz, 6H, 2  $\text{CH}_3$ ), 4.05 (q,  $J = 7.1$  Hz, 4H, 2  $\text{OCH}_2$ ), 8.01 (s, 1H, CH);  $^{13}\text{C}$  NMR (126 MHz,  $\text{DMSO-}d_6$ )  $\delta$  14.50 ( $\text{CH}_3$ ), 59.07 ( $\text{OCH}_2$ ), 72.55 (C-3), 117.93 (C-2, C-4), 150.05 (CN), 166.53 (C-1, C-5); MS (EI)  $m/z$  (%): 236 ( $\text{M}^+$ , 76), 221 (36), 193 (81), 165 (46), 147 (41), 138 (72), 120 (20), 109 (19), 95 (28), 68 (54), 44

(100); Anal calcd for C<sub>6</sub>H<sub>11</sub>N<sub>5</sub>O<sub>3</sub>: C, 51.97; H, 5.55; N, 11.02; found: C, 51.45; H, 5.58; N, 10.96.

## Crystallographic details

The single crystals of the compounds **5** and **11** were obtained by crystallization from acetone-ethanol 2:1 and acetonitrile, respectively. The X-ray studies were performed on an Xcalibur 3 CCD diffractometer at 295(2) K (MoK $\alpha$  irradiation, graphite monochromator, CCD detector,  $\omega/2\theta$  scanning). The crystal structures were solved by direct methods followed by Fourier synthesis with SHELXS-97 and refined with full-matrix least squares methods for all non-hydrogen atoms with SHELXL-97 software packages [5].

**Crystallographic data for 5:** C<sub>9</sub>H<sub>8</sub>F<sub>3</sub>N<sub>7</sub>O<sub>2</sub> ( $M = 393.23$ ) are monoclinic, space group  $P2(1)/c$ ,  $a = 13.6445(10)$  Å,  $b = 8.2009(16)$  Å,  $c = 12.3719(17)$  Å,  $\alpha = \gamma = 90^\circ$ ,  $\beta = 116.625(11)^\circ$ ,  $V = 1237.6(3)$  Å<sup>3</sup>,  $Z = 4$ ,  $D_{\text{calc}} = 1.627$  g/cm<sup>3</sup>,  $\mu(\text{MoK}\alpha) = 0.133$  mm<sup>-1</sup>,  $F(000) = 616$ , 8453 reflections measured, 2256 unique reflections which were used in all calculations. The final  $R$  is 0.0596, number of refined parameters 227.

**Crystallographic data for 11:** C<sub>12</sub>H<sub>15</sub>N<sub>7</sub>O<sub>4</sub> H<sub>2</sub>O C<sub>2</sub>H<sub>3</sub>N ( $M = 380.38$ ) are monoclinic, space group  $P2(1)/c$ ,  $a = 12.4718(7)$  Å,  $b = 14.4203(11)$  Å,  $c = 9.7541(9)$  Å,  $\alpha = \gamma = 90^\circ$ ,  $\beta = 100.554(7)^\circ$ ,  $V = 1724.6(2)$  Å<sup>3</sup>,  $Z = 4$ ,  $D_{\text{calc}} = 1.465$  g/cm<sup>3</sup>,  $\mu(\text{MoK}\alpha) = 0.114$  mm<sup>-1</sup>,  $F(000) = 800$ , 11671 reflections measured, 2184 unique reflections which were used in all calculations. The final  $R$  is 0.0541, number of refined parameters 278.

CCDC Nos. 918900 and 1022736 contain the supplementary crystallographic data for **5** and **11**, respectively. These data can be obtained free of charge via <http://www.ccdc.cam.ac.uk/conts/retrieving.html> (or from the CCDC, 12 Union Road, Cambridge CB2 1EZ, UK; fax: +44 1223 336033; e-mail: [deposit@ccdc.cam.ac.uk](mailto:deposit@ccdc.cam.ac.uk)).

## References

1. Pryadeina, M. V.; Burgart, Ya. V.; Saloutin, V. I.; Slepukhin, P. A.; Kazheva, O. N.; Shilov, G. V.; D'yachenko, O. A.; Chupakhin, O. N. *Russ. J. Org. Chem.* **2007**, *43*, 945–955. doi: 10.1134/S1070428007070019
2. Ackermann, O.; Bretzinger, D.; Schneidewind, H.; Stephan R. Alkoxyethylene compounds. US Patent 4277418 A, July 7, 1981; *Chem. Abstr.* **1981**, *95*, 149983.
3. Misra, R. N.; Rawlins, D. B.; Xiao, H.-y.; Shan, W.; Bursuker, I.; Kellar, K. A.; Mulheron, J. G.; Sack, J. S.; Tokarski, J. S.; Kimball, S. D.; Webster, K. R. *Bioorg. Med. Chem. Lett.* **2003**, *13*, 1133–1136.  
doi: 10.1016/S0960-894X(03)00034-9
4. Sansebastiano, L.; Mosti, L.; Menozzi, G.; Schenone, P.; Muratore, O.; Petta, A.; Debbia, E.; Schito, A. P.; Schito, G. C. *Farmaco, Ed. Sci.* **1993**, *48*, 335–355.
5. Sheldrick, G. M. *Acta Crystallogr., Sect. A* 2008, *A64*, 112–122.  
doi: 10.1107/S0108767307043930

Current Data Parameters  
NAME PMV5282  
EXPNO 1  
PROCNO 1

F2 - Acquisition Parameters  
Date\_ 20130712  
Time 13.56  
INSTRUM AV500  
PROBHD 5 mm PABBO BB-  
PULPROG zg30  
SOLVENT CDCl3  
TD 32768  
SW 12.0160 ppm  
O1P 5.000 ppm  
FIDRES 0.183399 Hz  
NS 16  
DS 2  
AQ 2.7263477 sec  
RG 101  
TE 296.6 K  
D1 1.00000000 sec  
TD0 1

===== CHANNEL f1 =====  
NUC1 1H  
P1 12.00 usec  
PL1 1.00 dB  
PL1W 16.10176659 W  
SFO1 500.1325007 MHz

F2 - Processing parameters  
SI 32768  
SF 500.1300064 MHz  
WDW EM  
SSB 0  
LB 0 Hz  
GB 0  
PC 4.00

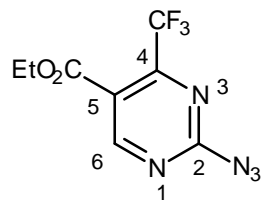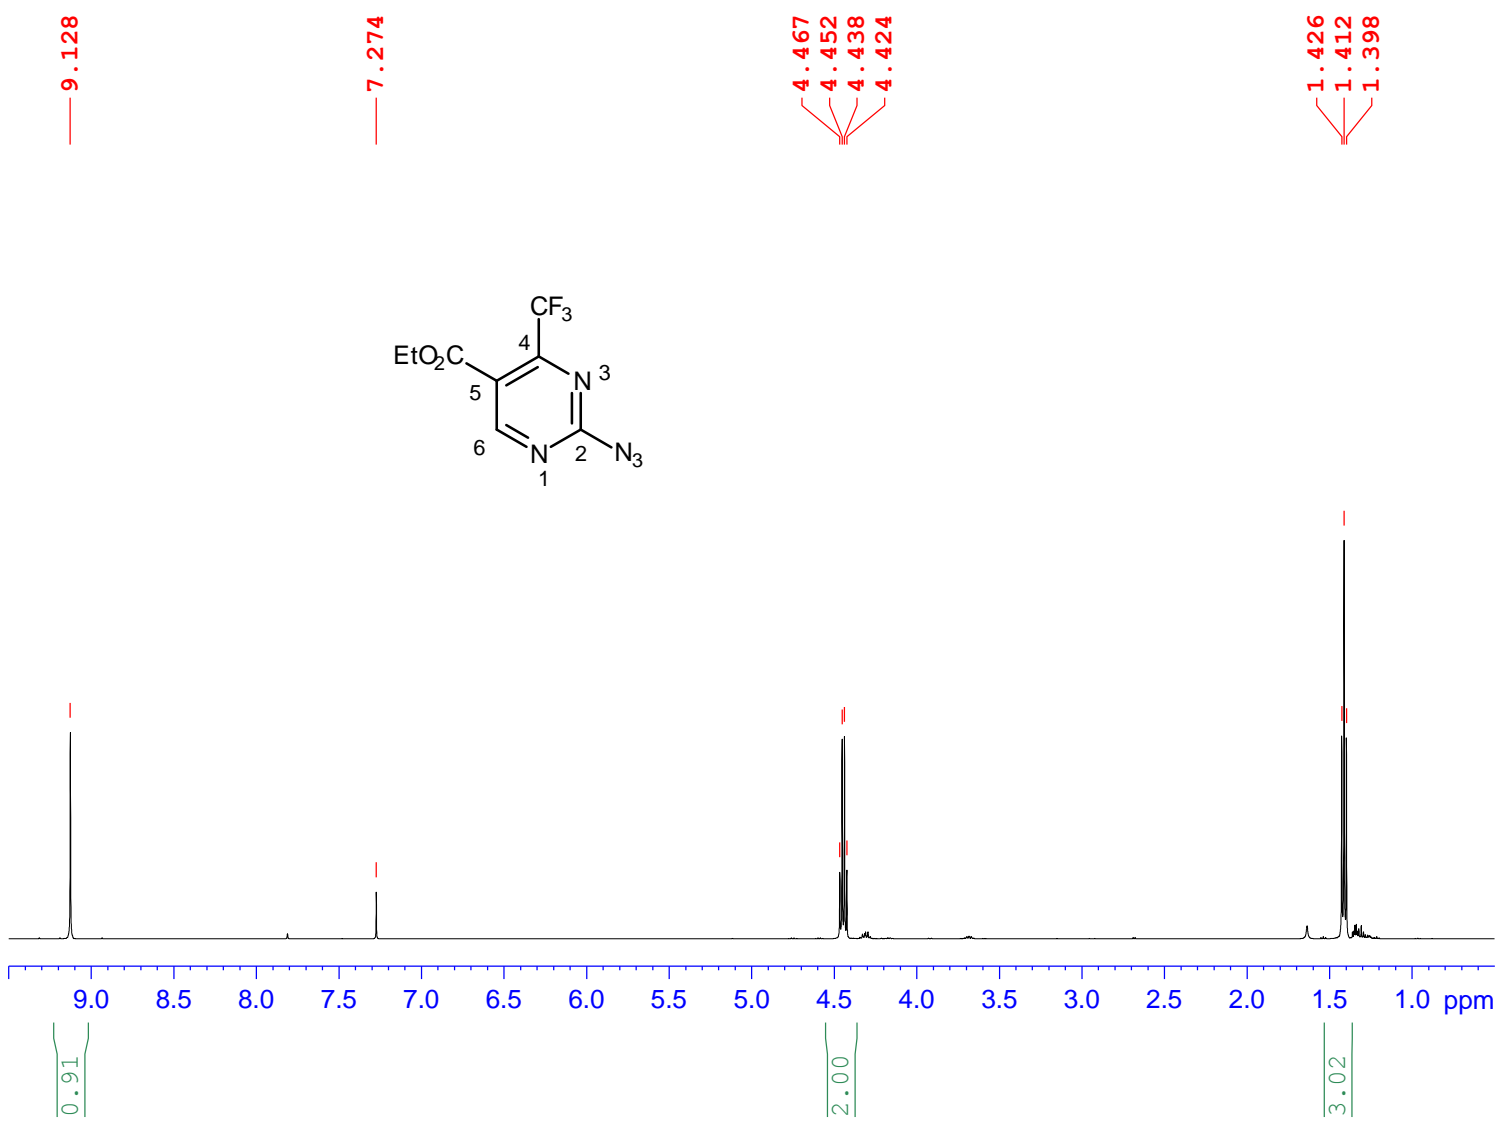

<sup>1</sup>H NMR (500 MHz, CDCl<sub>3</sub>) spectrum of **2a**.

95.335

0.000

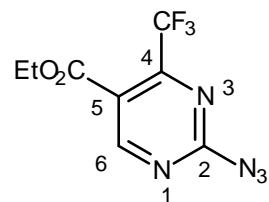

Current Data Parameters  
NAME PMV5282  
EXPNO 19  
PROCNO 1

F2 - Acquisition Parameters  
Date\_ 20130712  
Time 14.06  
INSTRUM AV500  
PROBHD 5 mm PABBO BB-  
PULPROG zgflqn  
SOLVENT CDCl3  
TD 262144  
SW 110.6886 ppm  
O1P 50.000 ppm  
FIDRES 0.198682 Hz  
NS 16  
DS 2  
AQ 2.5166323 sec  
RG 203  
TE 296.6 K  
D1 1.00000000 sec

===== CHANNEL f1 =====  
NUC1 19F  
P1 5.00 usec  
PL1 -5.00 dB  
PL1W 46.07103729 W  
SFO1 470.5394058 MHz

F2 - Processing parameters  
SI 262144  
SF 470.5162425 MHz  
WDW EM  
SSB 0  
LB 0.25 Hz  
GB 0  
PC 1.50

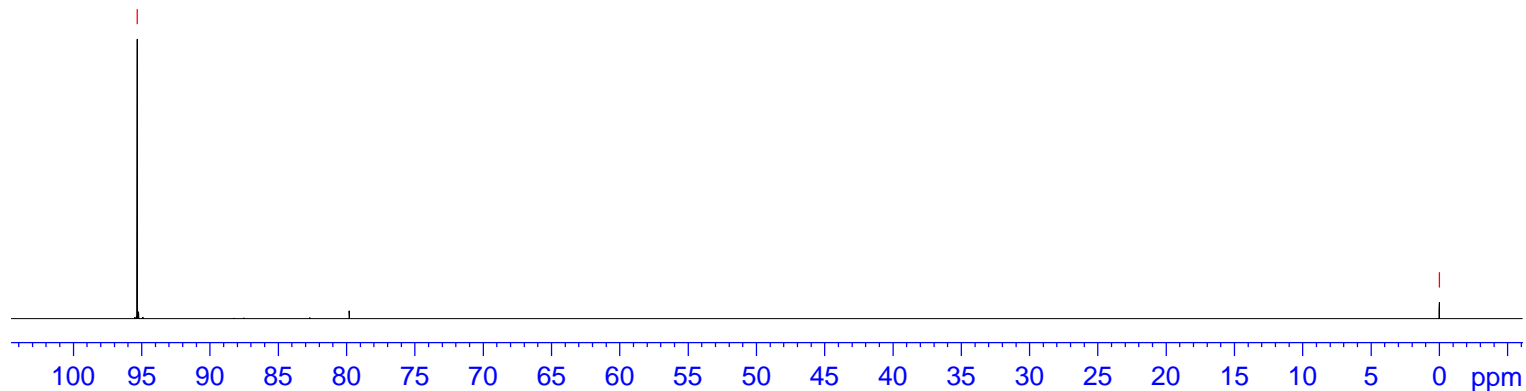

<sup>19</sup>F NMR (470 MHz, CDCl<sub>3</sub>) spectrum of **2a**.

163.891  
162.967  
162.541  
156.238  
155.937  
155.637  
155.336

122.863  
120.664  
119.674  
118.464  
116.264

77.254  
77.000  
76.746

62.900

13.807

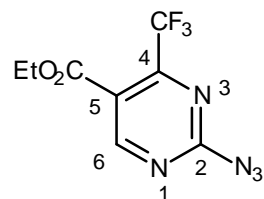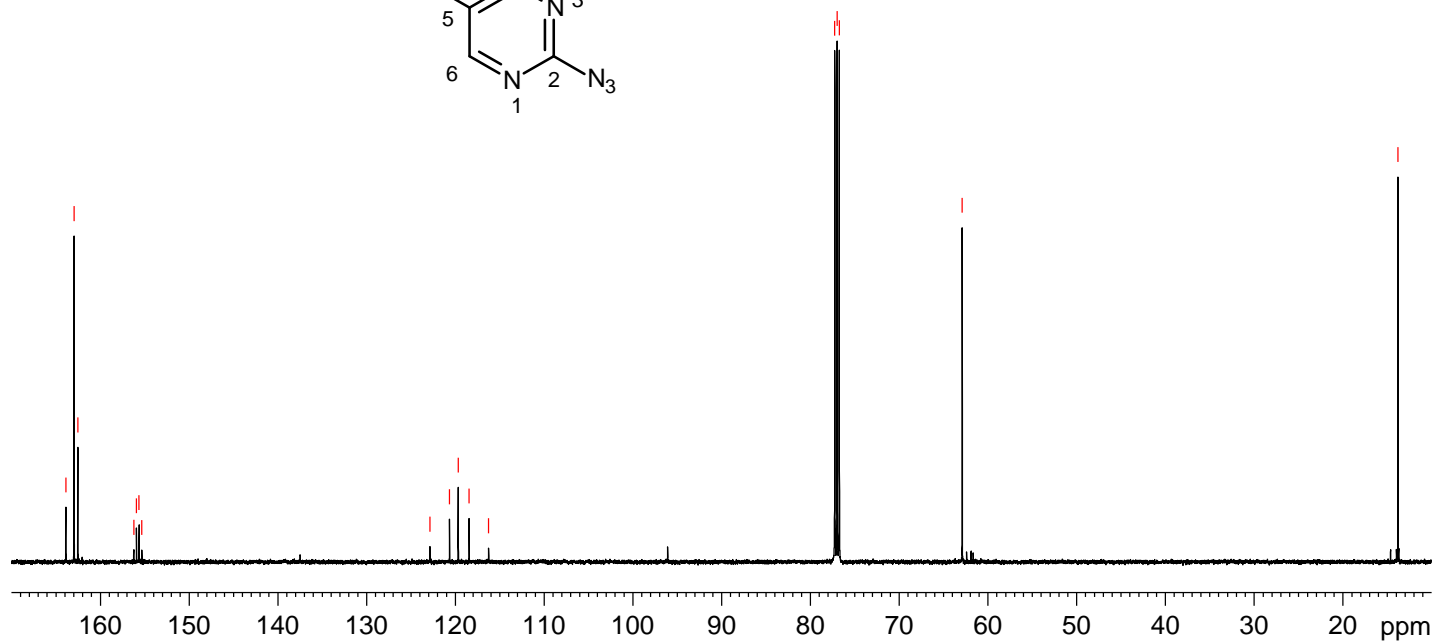

<sup>13</sup>C NMR (126 MHz, CDCl<sub>3</sub>) spectrum of **2a**.

Current Data Parameters  
NAME PMV5282  
EXPNO 13  
PROCNO 1

F2 - Acquisition Parameters  
Date\_ 20130712  
Time\_ 14.14  
INSTRUM AV500  
PROBHD 5 mm PABBO BB-  
PULPROG zgpg30  
SOLVENT CDCl3  
TD 65536  
SW 200.7838 ppm  
O1P 95.000 ppm  
FIDRES 0.385323 Hz  
NS 1024  
DS 8  
AQ 1.2976629 sec  
RG 203  
TE 297.1 K  
D1 0.8000001 sec  
D11 0.0300000 sec  
TD0 1

===== CHANNEL f1 =====  
NUC1 13C  
P1 9.00 usec  
PL1 0 dB  
PL1W 115.29558563 W  
SFO1 125.7697360 MHz

===== CHANNEL f2 =====  
CPDPRG2 waltz16  
NUC2 1H  
PCPD2 75.00 usec  
PL2 120.00 dB  
PL12 17.00 dB  
PL13 20.00 dB  
PL2W 0 W  
PL12W 0.40445811 W  
PL13W 0.20270923 W  
SFO2 500.1320005 MHz

F2 - Processing parameters  
SI 65536  
SF 125.7577915 MHz  
WDW EM  
SSB 0  
LB 1.00 Hz  
GB 0  
PC 1.40

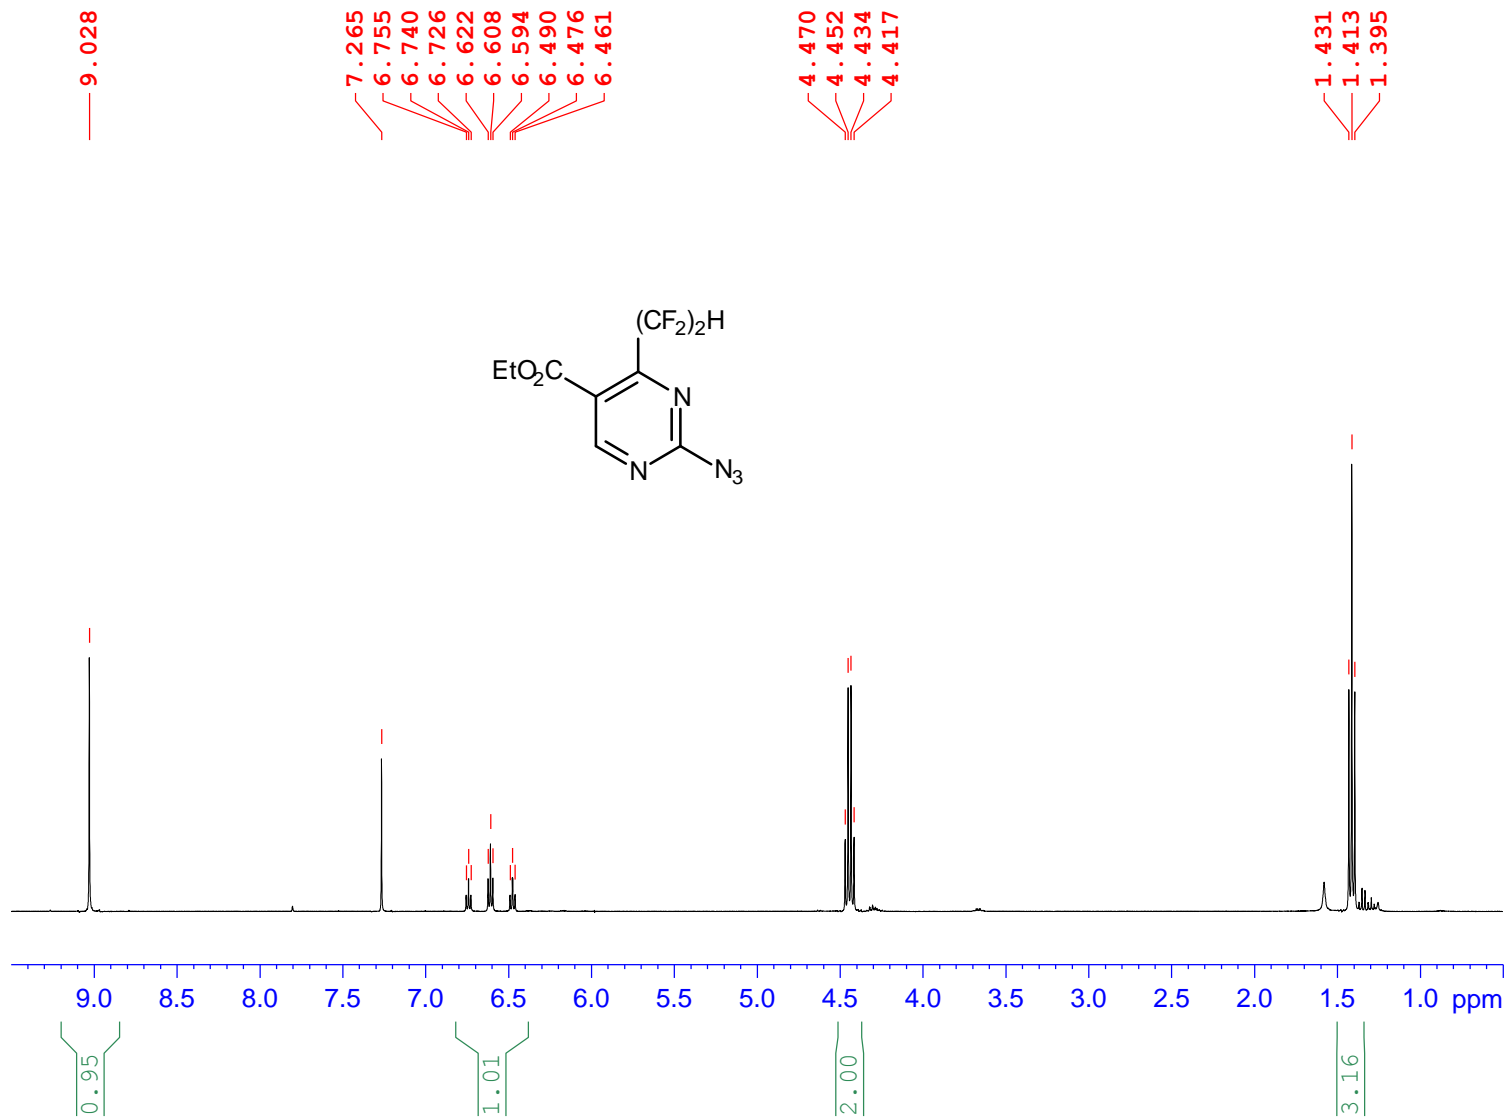

Current Data Parameters  
 NAME PMV5061  
 EXPNO 1  
 PROCNO 1

F2 - Acquisition Parameters  
 Date\_ 20130614  
 Time\_ 11.52  
 INSTRUM DRX400  
 PROBHD 5 mm SEF 19F-1  
 PULPROG zg30  
 TD 32768  
 SOLVENT CDCl3  
 NS 16  
 DS 2  
 SW 13.9775 ppm  
 O1P 6.000 ppm  
 FIDRES 0.170680 Hz  
 AQ 2.9295092 sec  
 RG 362  
 DW 89.400 usec  
 TE 297.2 K  
 D1 1.00000000 sec  
 MCREST 0 sec  
 MCWRK 0.01500000 sec

===== CHANNEL f1 =====  
 NUC1 1H  
 P1 20.00 usec  
 PL1 0 dB  
 SFO1 400.1324008 MHz

F2 - Processing parameters  
 SI 32768  
 SF 400.1300073 MHz  
 WDW EM  
 SSB 0  
 LB 0 Hz  
 GB 0  
 PC 2.00

<sup>1</sup>H NMR (400 MHz, CDCl<sub>3</sub>) spectrum of **2b**.



44.571  
44.556  
44.549  
44.534  
44.527  
44.511

23.849  
23.827  
23.805  
23.709  
23.686  
23.664

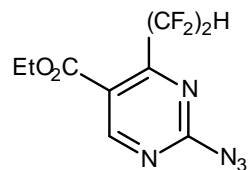

Current Data Parameters  
NAME PMV5061  
EXPNO 19  
PROCNO 1

F2 - Acquisition Parameters  
Date\_ 20130614  
Time 12.56  
INSTRUM DRX400  
PROBHD 5 mm SEF 19F-1  
PULPROG zg30  
TD 131072  
SOLVENT CDCl3  
NS 8  
DS 2  
SW 60.0321 ppm  
O1P 25.000 ppm  
FIDRES 0.172416 Hz  
AQ 2.9000180 sec  
RG 1024  
DW 22.125 usec  
TE 297.2 K  
D1 1.00000000 sec  
MCREST 0 sec  
MCWRK 0.01500000 sec

==== CHANNEL f1 =====  
NUC1 19F  
P1 10.10 usec  
PL1 0 dB  
SFO1 376.4466959 MHz

F2 - Processing parameters  
SI 131072  
SF 376.4374726 MHz  
WDW EM  
SSB 0  
LB 0 Hz  
GB 0  
PC 4.00

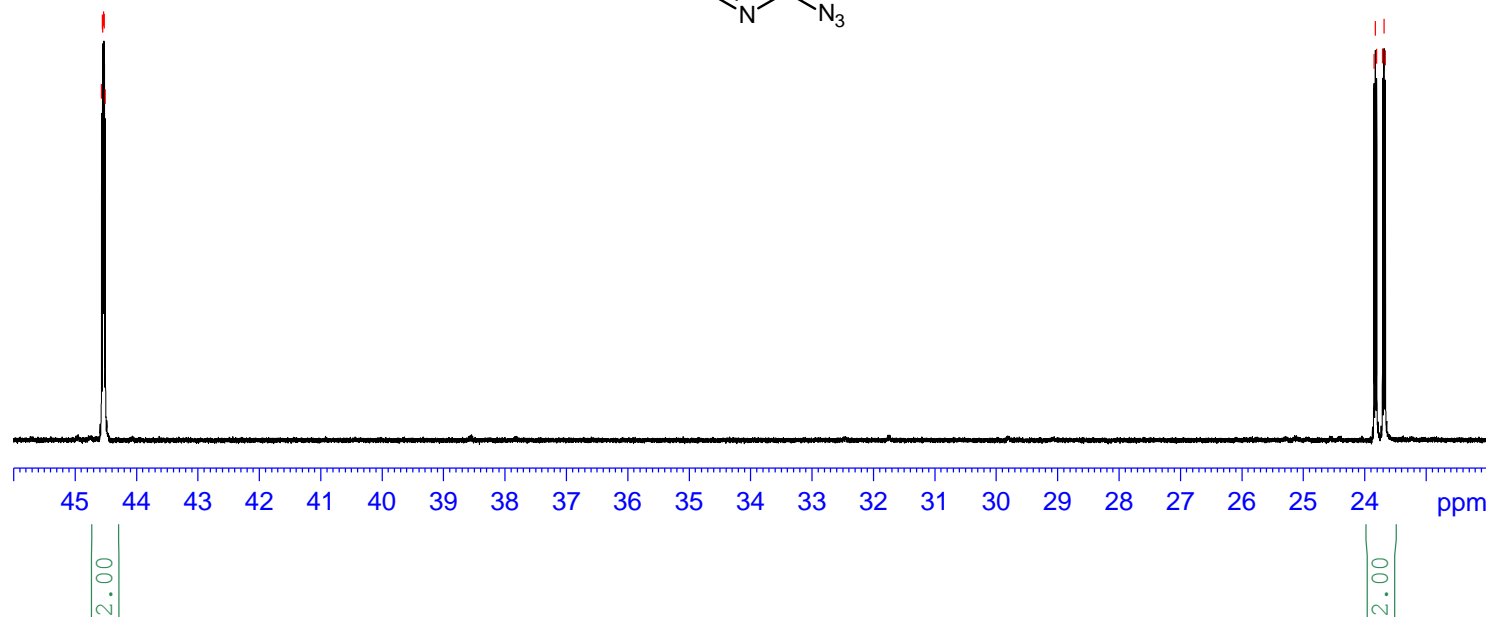

<sup>19</sup>F NMR (376 MHz, CDCl<sub>3</sub>) spectrum of **2b**.

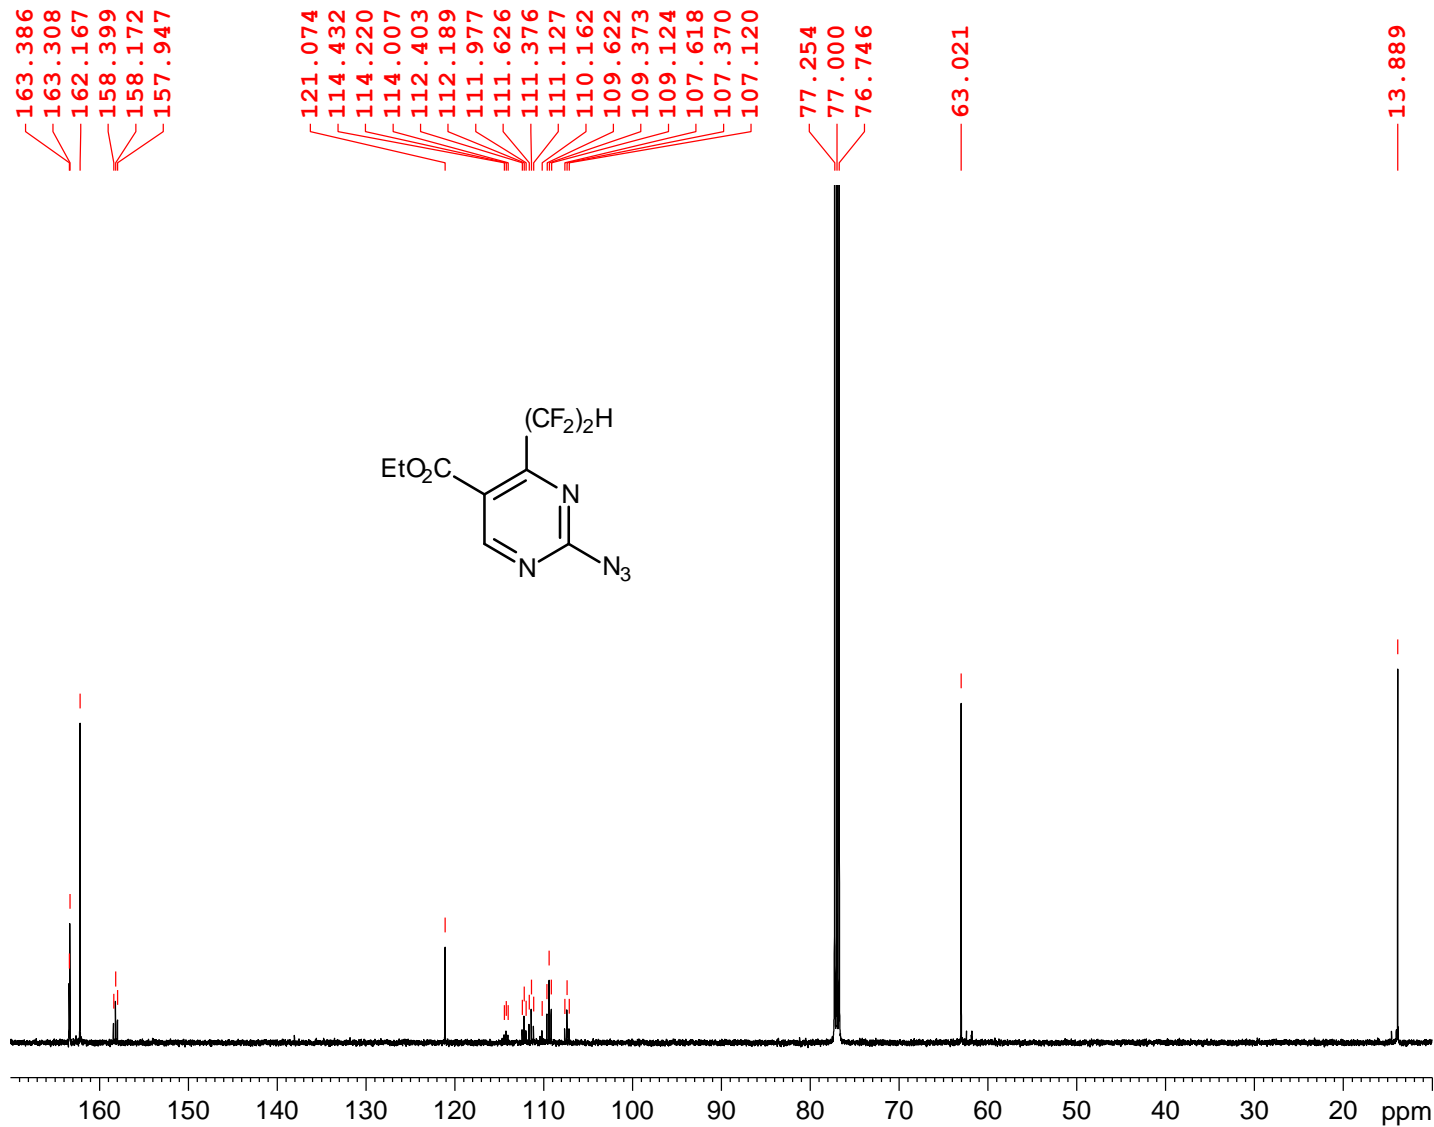

Current Data Parameters  
 NAME PMV5061  
 EXPNO 13  
 PROCNO 1

F2 - Acquisition Parameters  
 Date\_ 20130712  
 Time 15.30  
 INSTRUM AV500  
 PROBHD 5 mm PABBO BB-  
 PULPROG zgpg30  
 SOLVENT CDCl3  
 TD 65536  
 SW 200.7838 ppm  
 O1P 95.000 ppm  
 FIDRES 0.385323 Hz  
 NS 2048  
 DS 8  
 AQ 1.2976629 sec  
 RG 203  
 TE 297.8 K  
 D1 0.80000001 sec  
 D11 0.03000000 sec  
 TD0 1

==== CHANNEL f1 =====  
 NUC1 13C  
 P1 9.00 usec  
 PL1 0 dB  
 PL1W 115.29558563 W  
 SFO1 125.7697360 MHz

==== CHANNEL f2 =====  
 CPDPRG2 waltz16  
 NUC2 1H  
 PCPD2 75.00 usec  
 PL2 120.00 dB  
 PL12 17.00 dB  
 PL13 20.00 dB  
 PL2W 0 W  
 PL12W 0.40445811 W  
 PL13W 0.20270923 W  
 SFO2 500.1320005 MHz

F2 - Processing parameters  
 SI 65536  
 SF 125.7577908 MHz  
 WDW EM  
 SSB 0  
 LB 1.00 Hz  
 GB 0  
 PC 1.40

<sup>13</sup>C NMR (126 MHz, CDCl<sub>3</sub>) spectrum of **2b**.

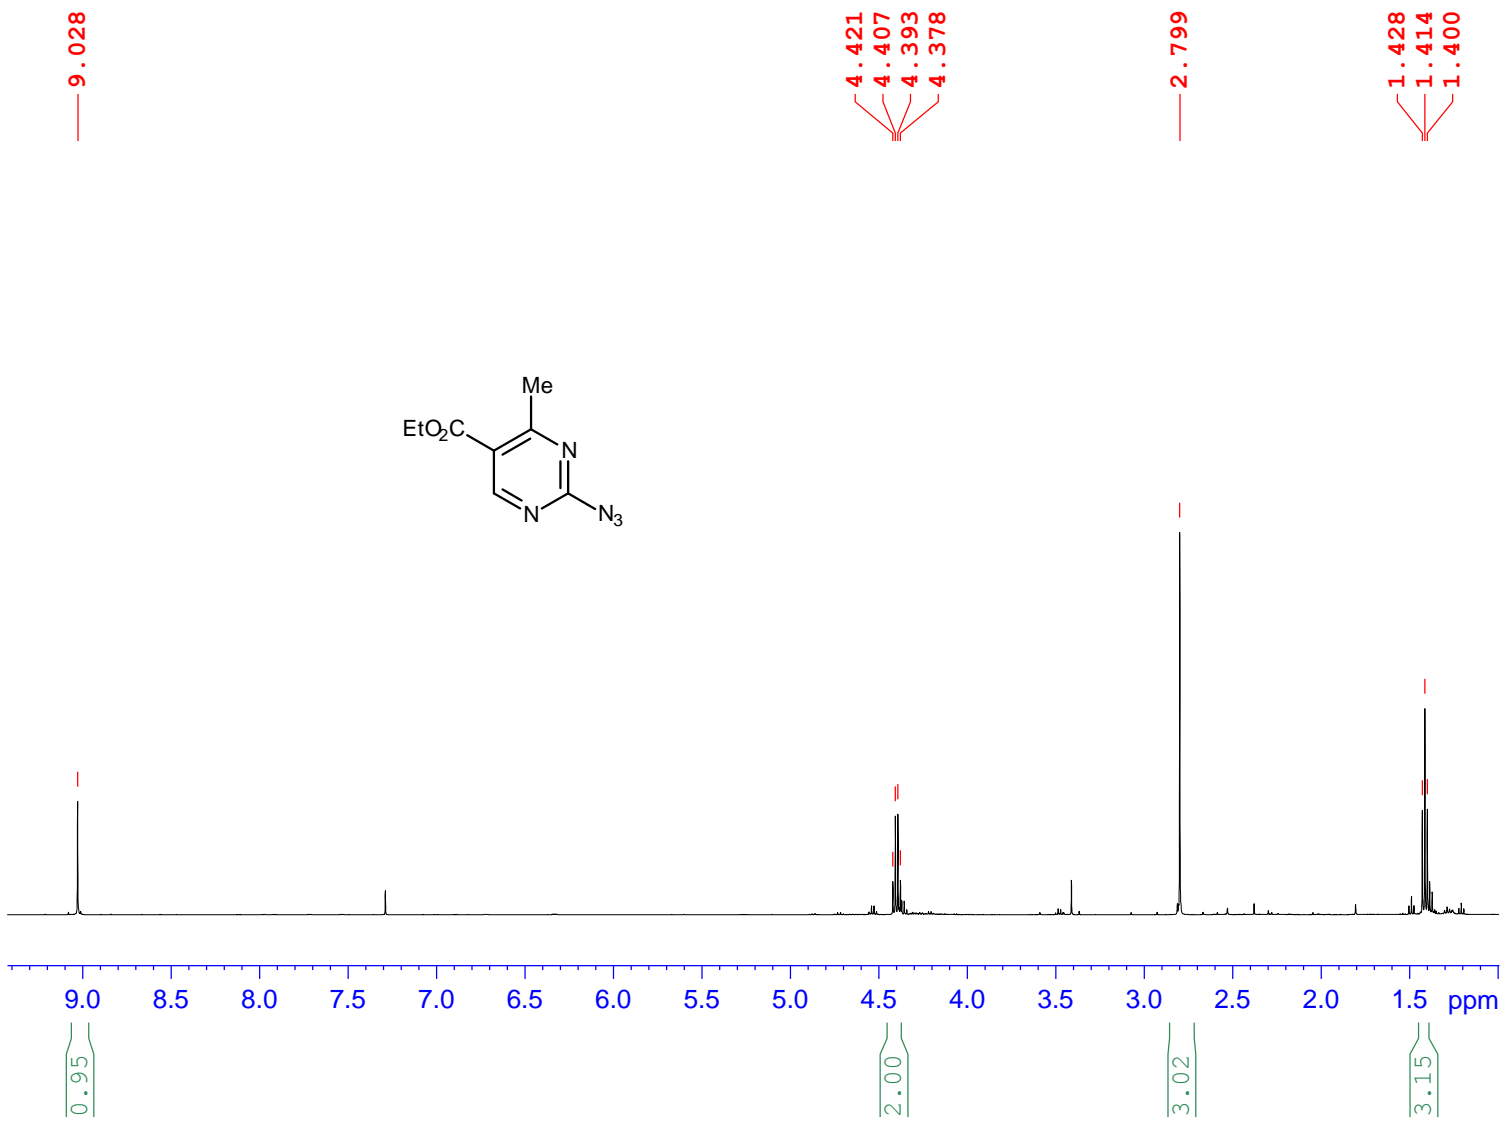

```

Current Data Parameters
NAME      PMV52912
EXPNO     1
PROCNO    1

F2 - Acquisition Parameters
Date_     20140402
Time      15.52
INSTRUM   AV500
PROBHD    5 mm PABBO BB-
PULPROG   zg30
SOLVENT   CDCl3
TD         65536
SW         19.9946 ppm
O1P        9.000 ppm
FIDRES     0.152588 Hz
NS         16
DS         2
AQ         3.2768500 sec
RG         64
TE         296.7 K
D1         1.00000000 sec
TD0        1

===== CHANNEL f1 =====
NUC1       1H
P1         12.00 usec
PL1        1.00 dB
PL1W       16.10176659 W
SFO1       500.1345012 MHz

F2 - Processing parameters
SI         32768
SF         500.1299996 MHz
WDW        EM
SSB        0
LB         0 Hz
GB         0
PC         4.00

```

<sup>1</sup>H NMR (500 MHz, CDCl<sub>3</sub>) spectrum of **2c**.

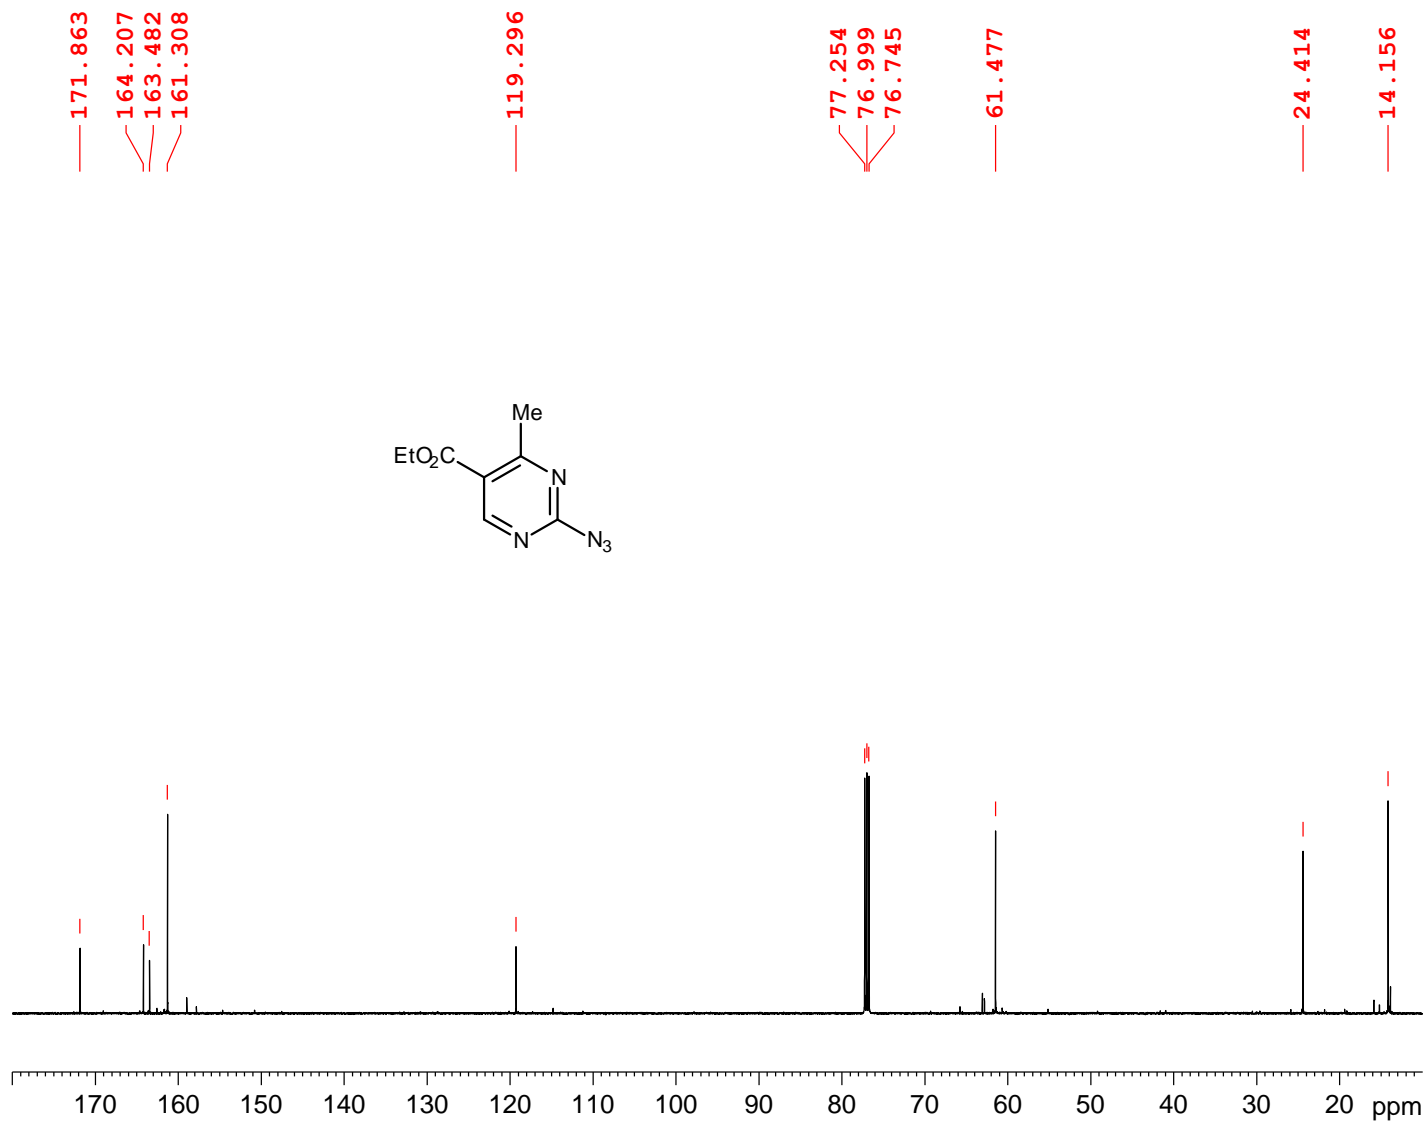

Current Data Parameters  
 NAME PMV52912  
 EXPNO 13  
 PROCNO 1

F2 - Acquisition Parameters  
 Date\_ 20140402  
 Time\_ 15.59  
 INSTRUM AV500  
 PROBHD 5 mm PABBO BB-  
 PULPROG zgpg30  
 SOLVENT CDCl3  
 TD 32768  
 SW 200.7828 ppm  
 O1P 100.000 ppm  
 FIDRES 0.770646 Hz  
 NS 2048  
 DS 8  
 AQ 0.6488564 sec  
 RG 203  
 TE 297.4 K  
 D1 0.8000001 sec  
 D11 0.0300000 sec  
 TD0 1

===== CHANNEL f1 =====  
 NUC1 13C  
 P1 9.00 usec  
 PL1 0 dB  
 PL1W 115.29558563 W  
 SFO1 125.7703648 MHz

===== CHANNEL f2 =====  
 CPDPRG2 waltz16  
 NUC2 1H  
 PCPD2 75.00 usec  
 PL2 1.00 dB  
 PL12 17.00 dB  
 PL13 20.00 dB  
 PL2W 16.10176659 W  
 PL12W 0.40445811 W  
 PL13W 0.20270923 W  
 SFO2 500.1325007 MHz

F2 - Processing parameters  
 SI 65536  
 SF 125.7577955 MHz  
 WDW EM  
 SSB 0  
 LB 1.00 Hz  
 GB 0  
 PC 1.40

<sup>13</sup>C NMR (126 MHz, CDCl<sub>3</sub>) spectrum of **2c**.

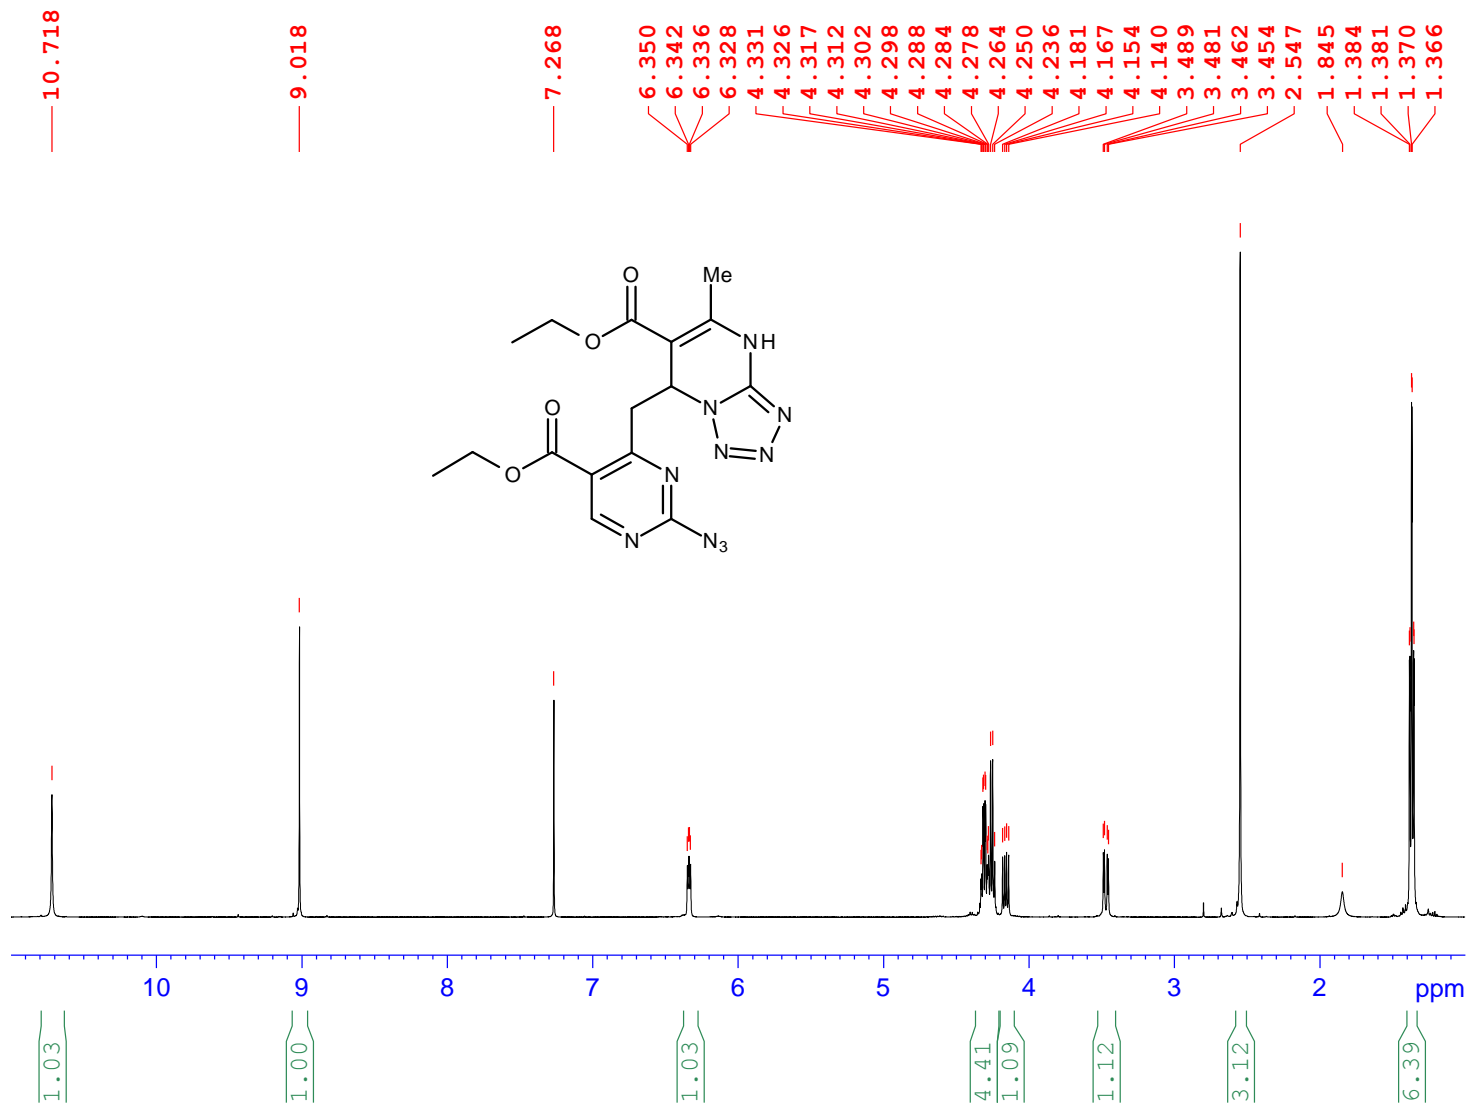

Current Data Parameters  
 NAME PMV5296  
 EXPNO 1  
 PROCNO 1

F2 - Acquisition Parameters  
 Date\_ 20130919  
 Time\_ 12.41  
 INSTRUM AV500  
 PROBHD 5 mm PABBO BB-  
 PULPROG zg30  
 SOLVENT CDC13  
 TD 32768  
 SW 16.0214 ppm  
 O1P 7.000 ppm  
 FIDRES 0.244532 Hz  
 NS 16  
 DS 2  
 AQ 2.0447731 sec  
 RG 128  
 TE 296.5 K  
 D1 1.00000000 sec  
 TD0 1

==== CHANNEL f1 =====  
 NUC1 1H  
 P1 12.00 usec  
 PL1 1.00 dB  
 PL1W 16.10176659 W  
 SFO1 500.1335009 MHz

F2 - Processing parameters  
 SI 32768  
 SF 500.1300096 MHz  
 WDW EM  
 SSB 0  
 LB 0 Hz  
 GB 0  
 PC 4.00

<sup>1</sup>H NMR (500 MHz, CDCl<sub>3</sub>) spectrum of 3.

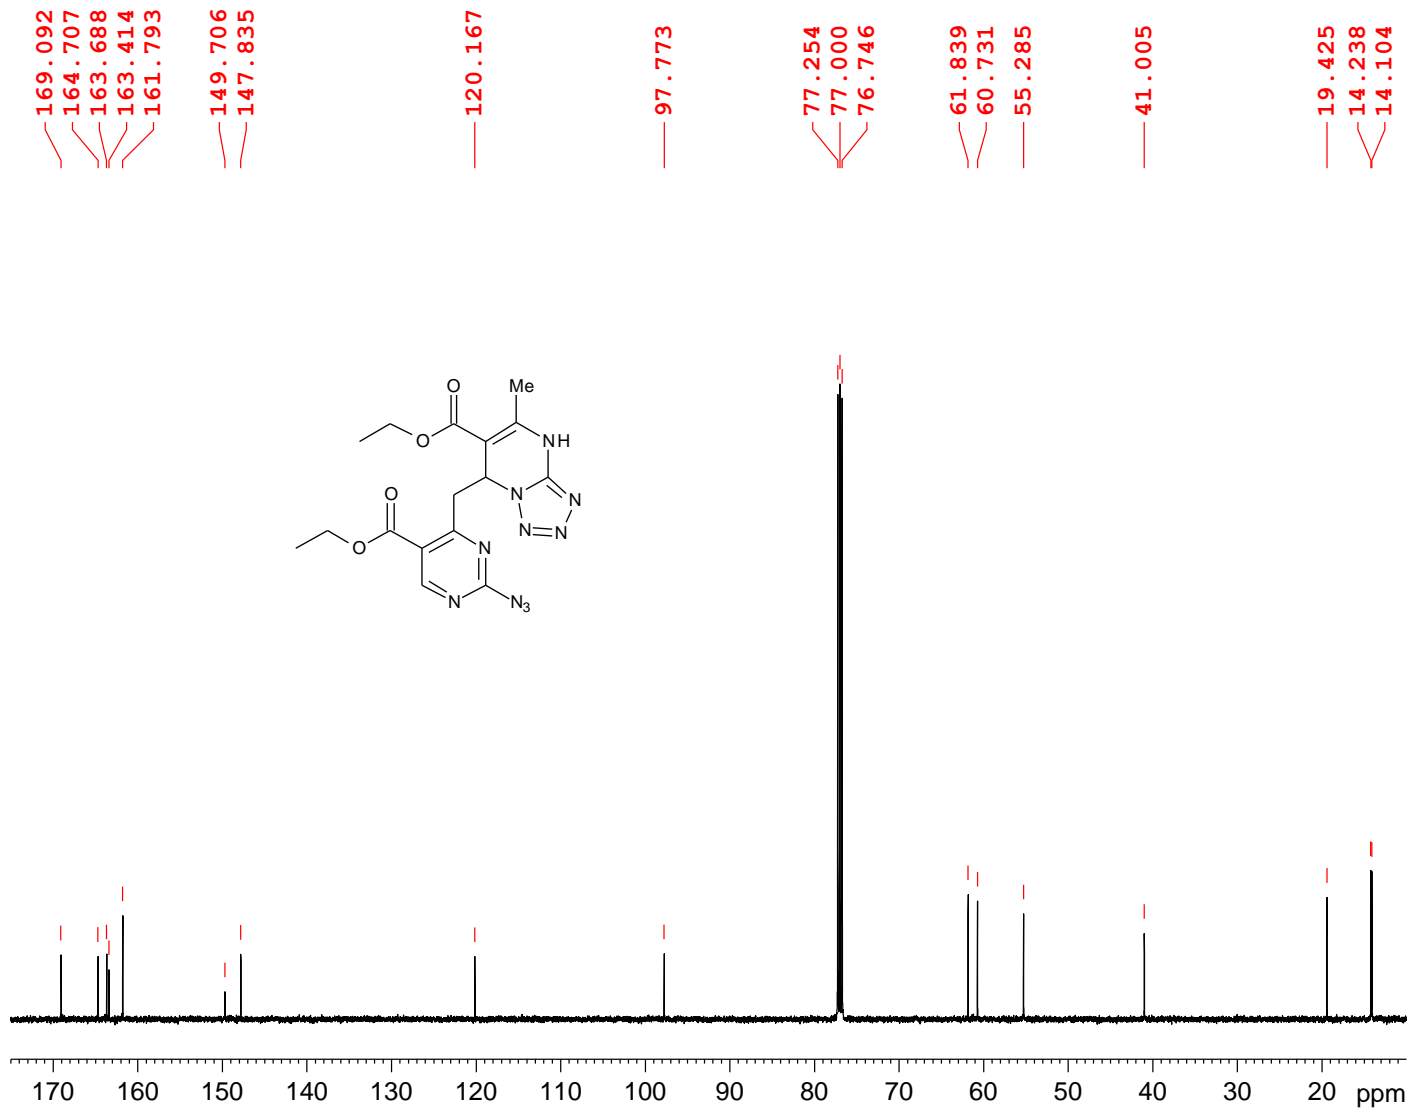

Current Data Parameters  
 NAME PMV5296  
 EXPNO 13  
 PROCNO 1

F2 - Acquisition Parameters  
 Date\_ 20130920  
 Time\_ 13.08  
 INSTRUM AV500  
 PROBHD 5 mm PABBO BB-  
 PULPROG zgpg30  
 SOLVENT CDC13  
 TD 32768  
 SW 219.2360 ppm  
 O1P 105.000 ppm  
 FIDRES 0.841477 Hz  
 NS 1024  
 DS 8  
 AQ 0.5942430 sec  
 RG 203  
 TE 297.9 K  
 D1 0.80000001 sec  
 D11 0.03000000 sec  
 TD0 1

===== CHANNEL f1 =====  
 NUC1 13C  
 P1 9.00 usec  
 PL1 0 dB  
 PL1W 115.29558563 W  
 SFO1 125.7709936 MHz

===== CHANNEL f2 =====  
 CPDPRG2 waltz16  
 NUC2 1H  
 PCPD2 75.00 usec  
 PL2 120.00 dB  
 PL12 17.00 dB  
 PL13 20.00 dB  
 PL2W 0 W  
 PL12W 0.40445811 W  
 PL13W 0.20270923 W  
 SFO2 500.1325007 MHz

F2 - Processing parameters  
 SI 65536  
 SF 125.7577928 MHz  
 WDW EM  
 SSB 0  
 LB 1.00 Hz  
 GB 0  
 PC 1.40

<sup>13</sup>C NMR (126 MHz, CDCl<sub>3</sub>) spectrum of 3.

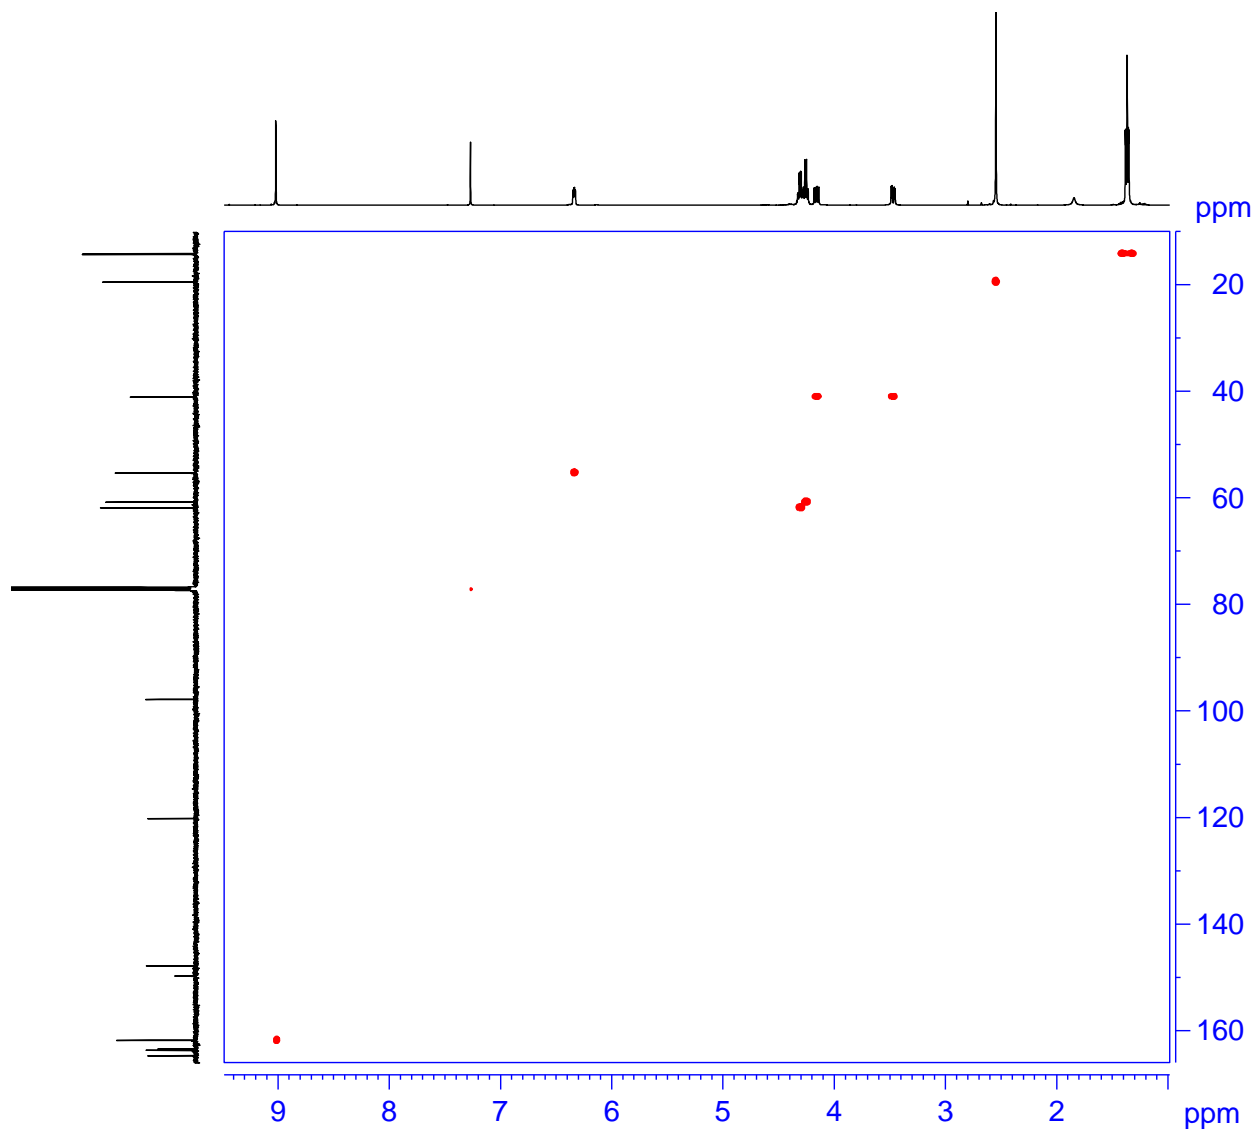

2D  $^1\text{H}$ - $^{13}\text{C}$  HSQC (500 MHz,  $\text{CDCl}_3$ ) spectrum of **3**

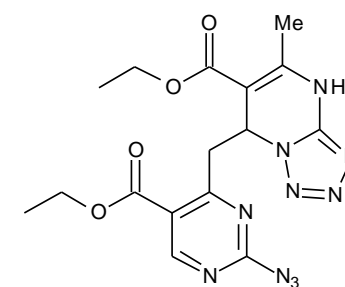

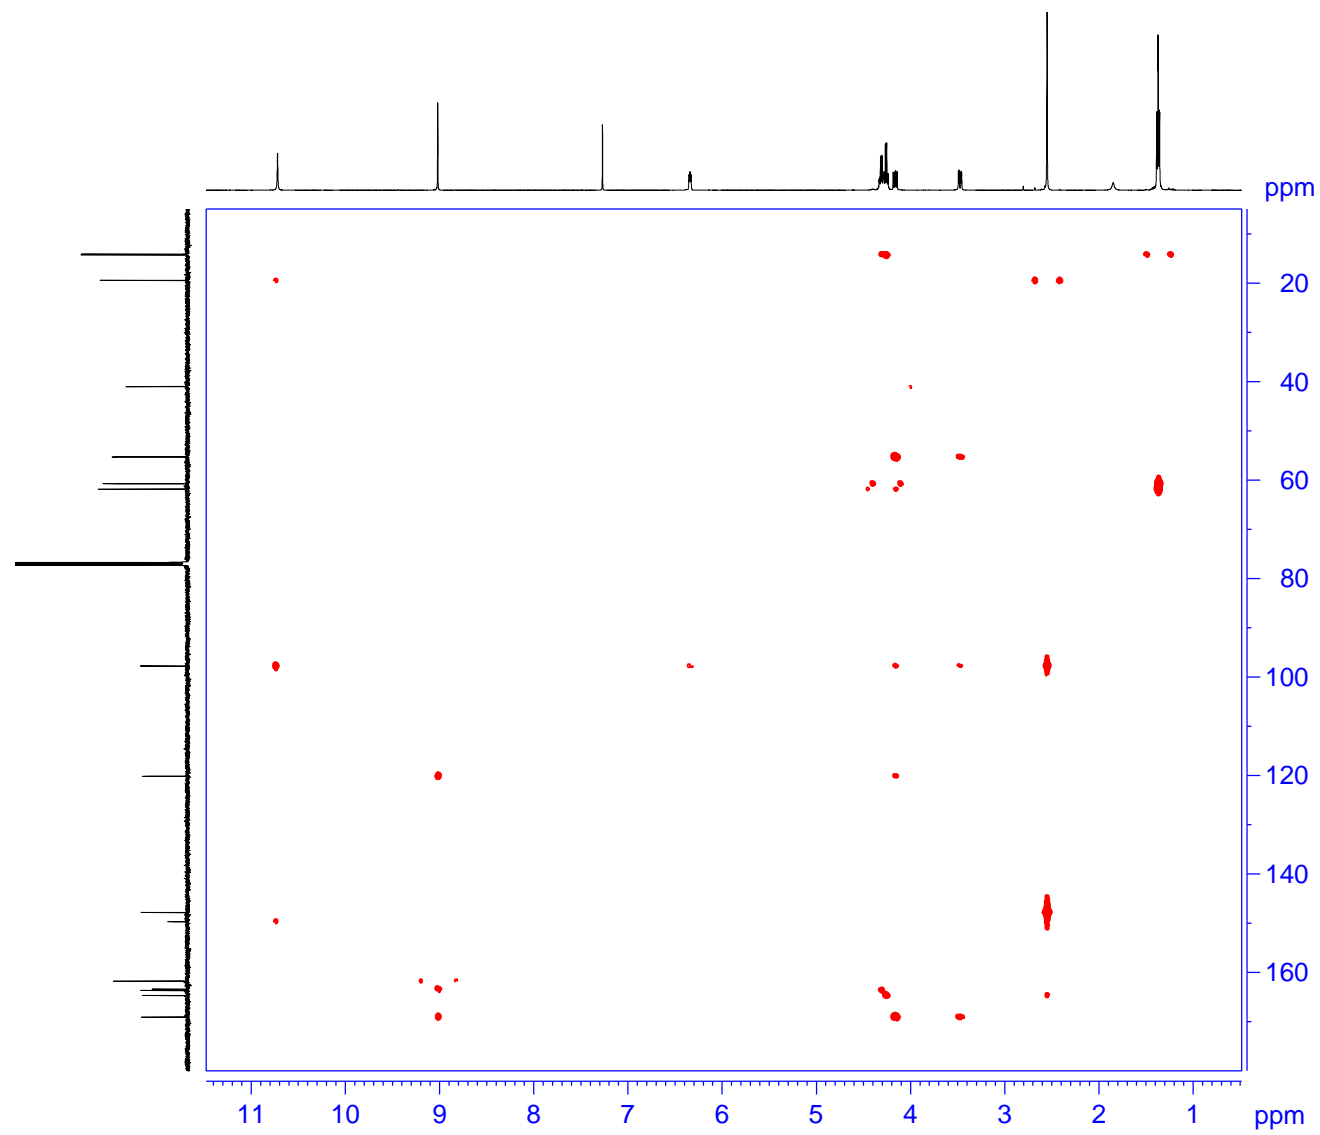

2D  $^1\text{H}$ - $^{13}\text{C}$  HMBC (500 MHz,  $\text{CDCl}_3$ ) spectrum of **3**

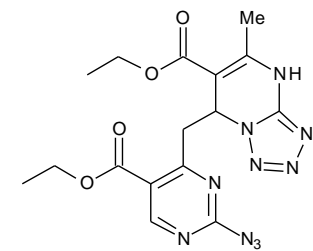



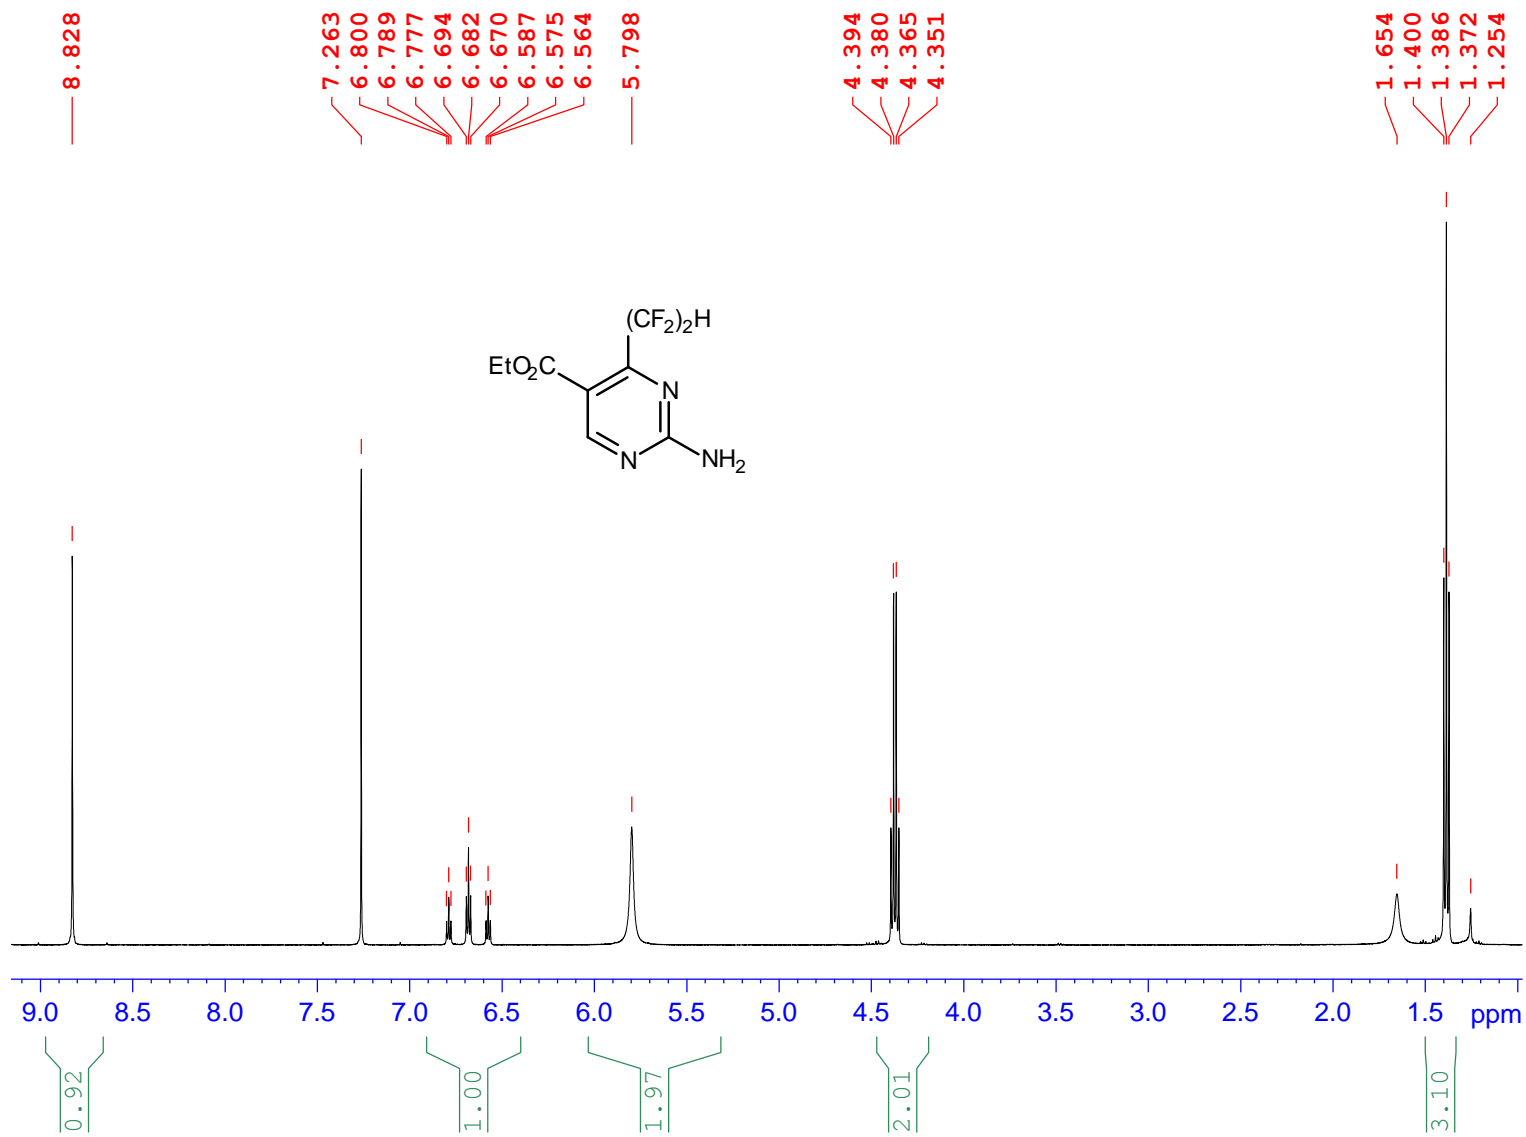

Current Data Parameters  
 NAME PMV3101  
 EXPNO 1  
 PROCNO 1

F2 - Acquisition Parameters  
 Date 20130926  
 Time 17.48  
 INSTRUM AV500  
 PROBHD 5 mm PABBO BB-  
 PULPROG zg30  
 SOLVENT CDCl3  
 TD 32768  
 SW 12.0160 ppm  
 O1P 5.000 ppm  
 FIDRES 0.183399 Hz  
 NS 16  
 DS 2  
 AQ 2.7263477 sec  
 RG 203  
 TE 296.4 K  
 D1 1.00000000 sec  
 TD0 1

==== CHANNEL f1 =====  
 NUC1 1H  
 P1 12.00 usec  
 PL1 1.00 dB  
 PL1W 16.10176659 W  
 SFO1 500.1325007 MHz

F2 - Processing parameters  
 SI 32768  
 SF 500.1300122 MHz  
 WDW EM  
 SSB 0  
 LB 0 Hz  
 GB 0  
 PC 4.00

<sup>1</sup>H NMR (500 MHz, CDCl<sub>3</sub>) spectrum of **4b**.

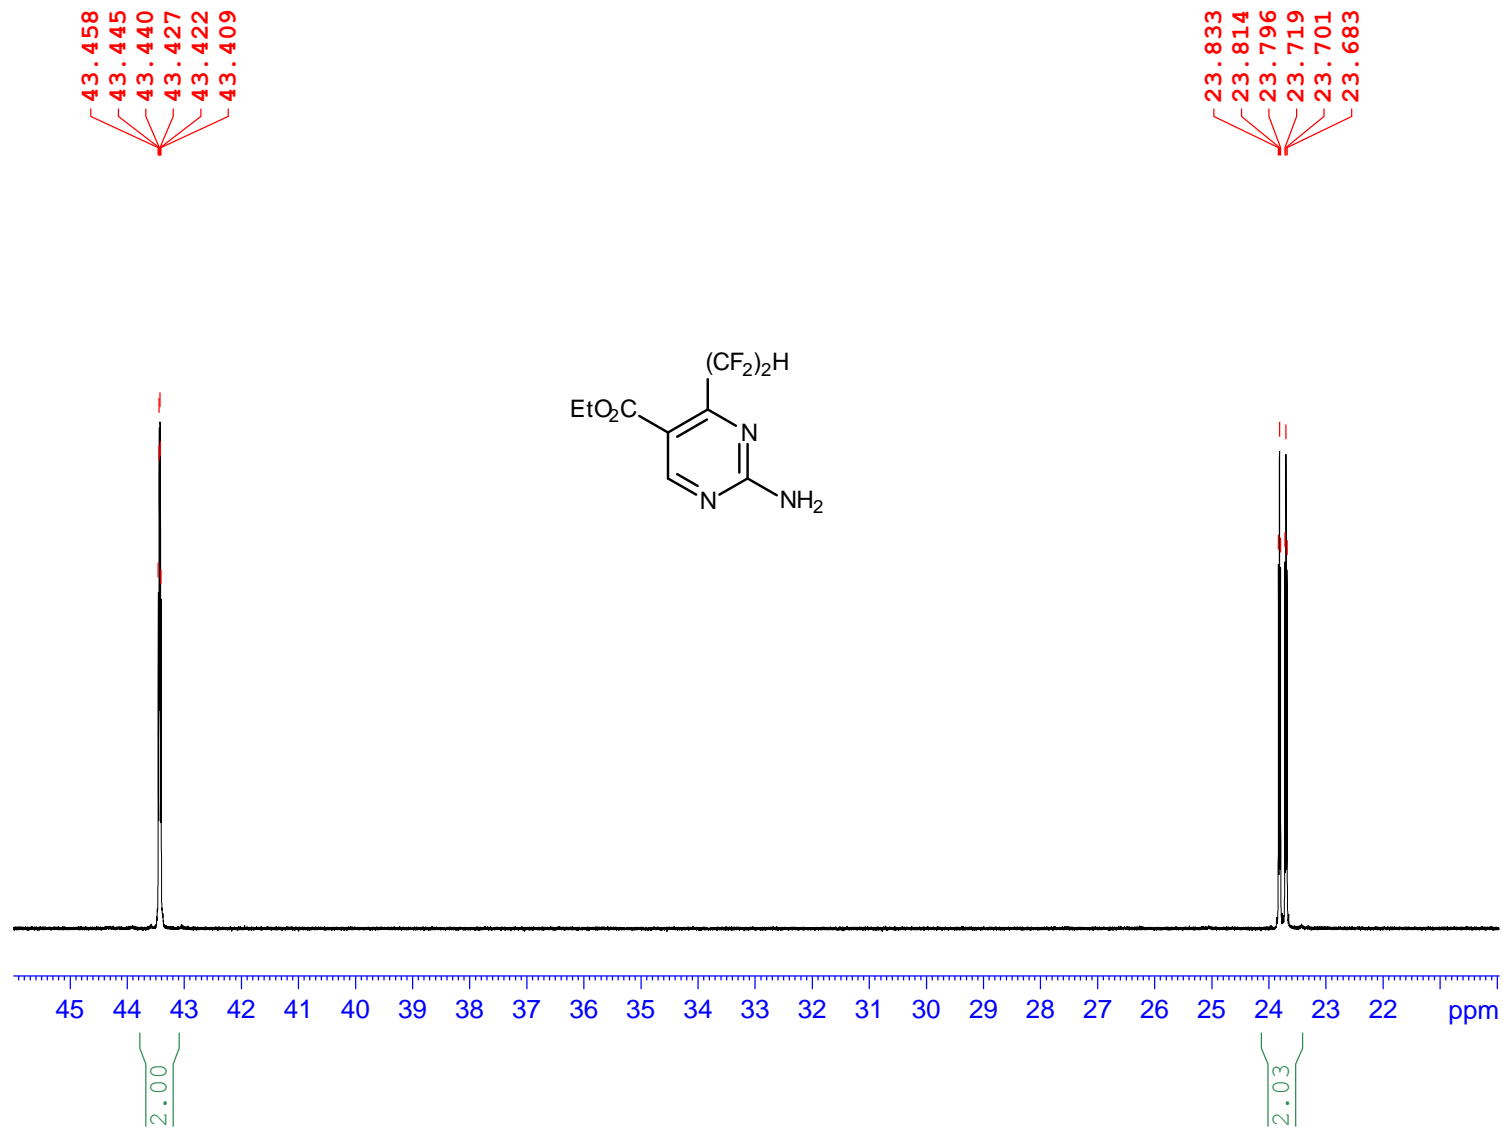

Current Data Parameters  
 NAME PMV3101  
 EXPNO 19  
 PROCNO 1

F2 - Acquisition Parameters  
 Date\_ 20130926  
 Time\_ 17.54  
 INSTRUM AV500  
 PROBHD 5 mm PABBO BB-  
 PULPROG zgfg  
 SOLVENT CDCl3  
 TD 131072  
 SW 60.3771 ppm  
 O1P 25.000 ppm  
 FIDRES 0.216744 Hz  
 NS 16  
 DS 2  
 AQ 2.3069172 sec  
 RG 203  
 TE 296.4 K  
 D1 1.00000000 sec  
 TD0 1

==== CHANNEL f1 =====  
 NUC1 19F  
 P1 5.00 usec  
 PL1 -5.00 dB  
 PL1W 46.07103729 W  
 SFO1 470.5276429 MHz

F1 - Acquisition parameters  
 TD 256  
 SFO1 125.7667 MHz  
 FIDRES 77.746742 Hz  
 SW 158.255 ppm  
 FnMODE States-TPPI

F2 - Processing parameters  
 SI 131072  
 SF 470.5162779 MHz  
 WDW EM

<sup>19</sup>F NMR (470 MHz, CDCl<sub>3</sub>) spectrum of **4b**.

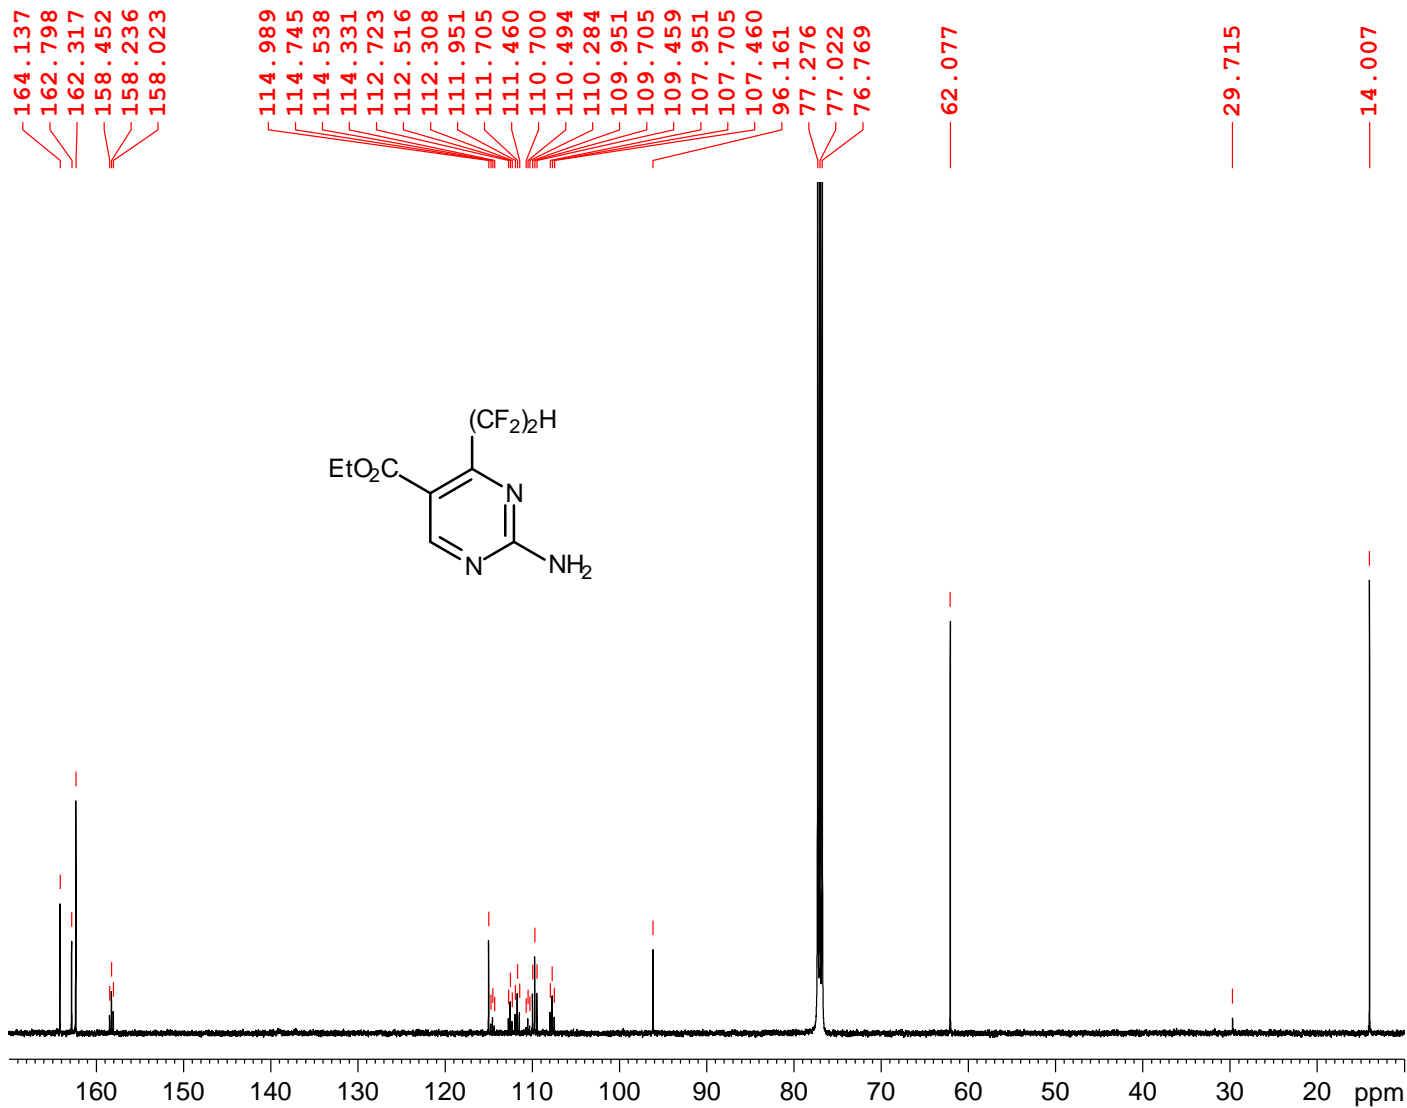

```

Current Data Parameters
NAME          PMV3101
EXPNO         13
PROCNO        1

F2 - Acquisition Parameters
Date_         20130926
Time          17.01
INSTRUM       AV500
PROBHD        5 mm PABBO BB-
PULPROG       zgpg30
SOLVENT        CDC13
TD             65536
SW             200.7838 ppm
O1P           95.000 ppm
FIDRES        0.385323 Hz
NS             24576
DS             8
AQ             1.2976629 sec
RG             203
TE             296.9 K
D1             0.80000001 sec
D11           0.03000000 sec
TD0            24

===== CHANNEL f1 =====
NUC1           13C
P1             9.00 usec
PL1            0 dB
PL1W           115.29558563 W
SFO1           125.7697360 MHz

===== CHANNEL f2 =====
CPDPRG2        waltz16
NUC2            1H
PCPD2           75.00 usec
PL2            120.00 dB
PL12           17.00 dB
PL13           20.00 dB
PL2W            0 W
PL12W           0.40445811 W
PL13W           0.20270923 W
SFO2           500.1320005 MHz

F2 - Processing parameters
SI             65536
SF             125.7577853 MHz
WDW            EM
SSB            0
LB             1.00 Hz
GB             0
PC             1.40

```

<sup>13</sup>C NMR (126 MHz, CDCl<sub>3</sub>) spectrum of 4b.

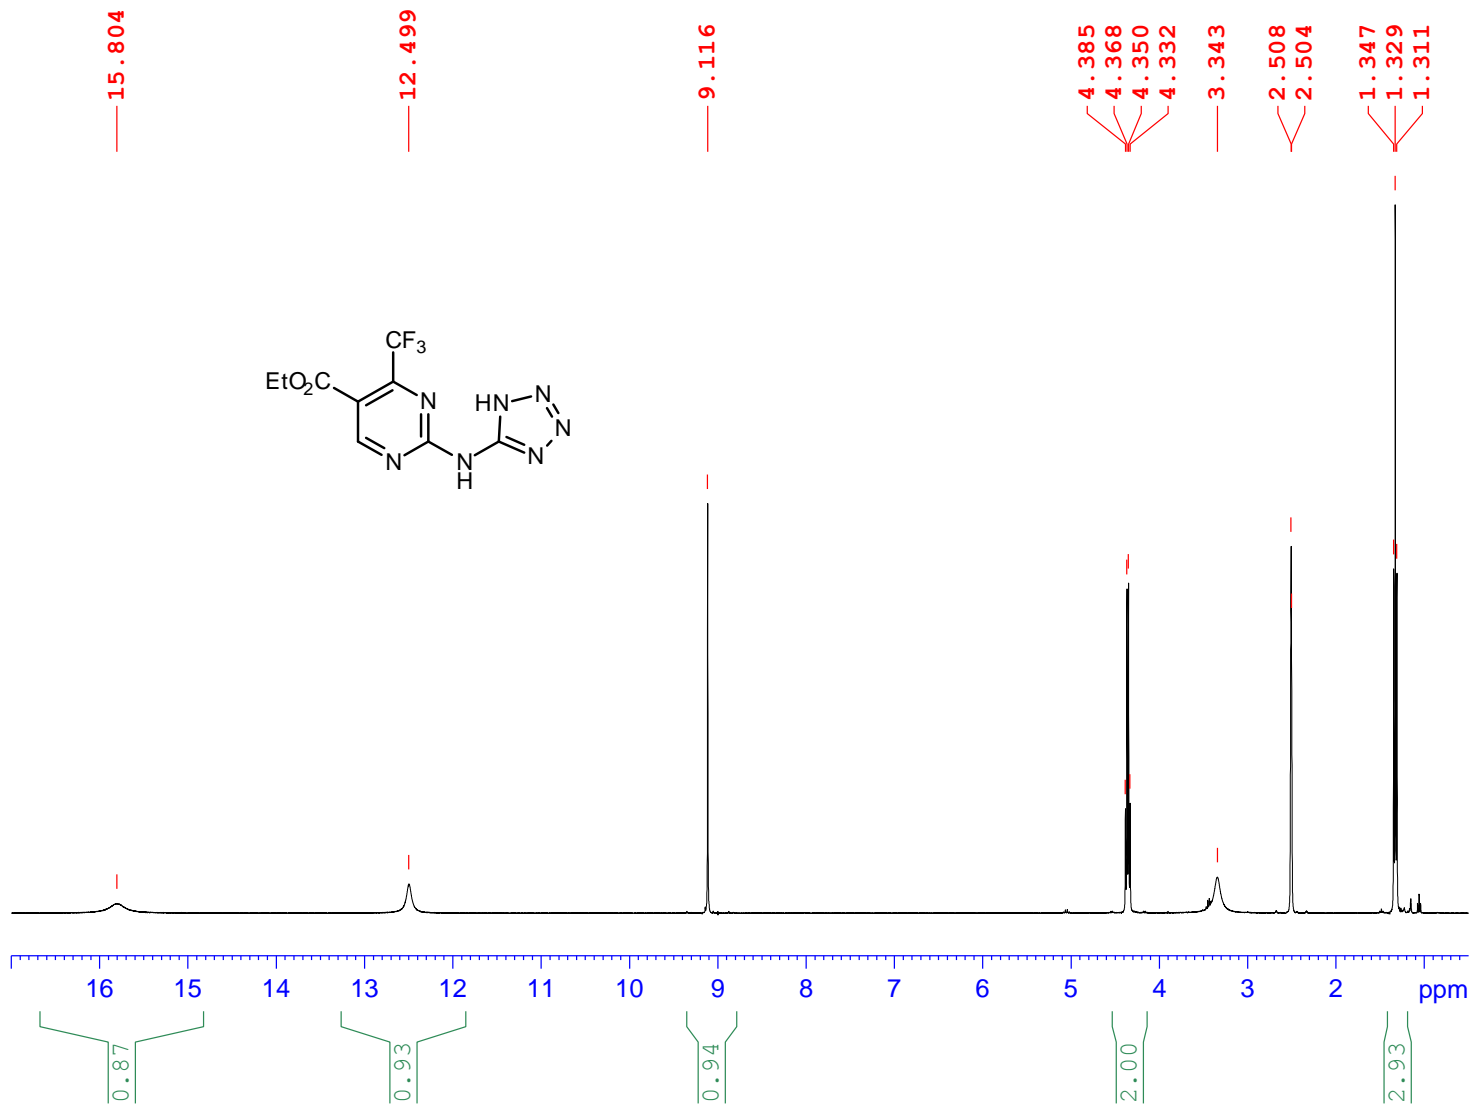

Current Data Parameters  
 NAME PMV531  
 EXPNO 1  
 PROCNO 1

F2 - Acquisition Parameters  
 Date\_ 20131008  
 Time\_ 13.47  
 INSTRUM DRX400  
 PROBHD 5 mm SEF 19F-1  
 PULPROG zg30  
 TD 32768  
 SOLVENT DMSO  
 NS 16  
 DS 2  
 SW 20.0254 ppm  
 O1P 9.000 ppm  
 FIDRES 0.244532 Hz  
 AQ 2.0447731 sec  
 RG 456.1  
 DW 62.400 usec  
 TE 296.2 K  
 D1 1.00000000 sec  
 MCREST 0 sec  
 MCWRK 0.01500000 sec

==== CHANNEL f1 =====  
 NUC1 1H  
 P1 20.00 usec  
 PL1 0 dB  
 SFO1 400.1336012 MHz

F2 - Processing parameters  
 SI 32768  
 SF 400.1299996 MHz  
 WDW EM  
 SSB 0  
 LB 0 Hz  
 GB 0  
 PC 4.00

<sup>1</sup>H NMR (400 MHz, DMSO-d<sub>6</sub>) spectrum of 5.

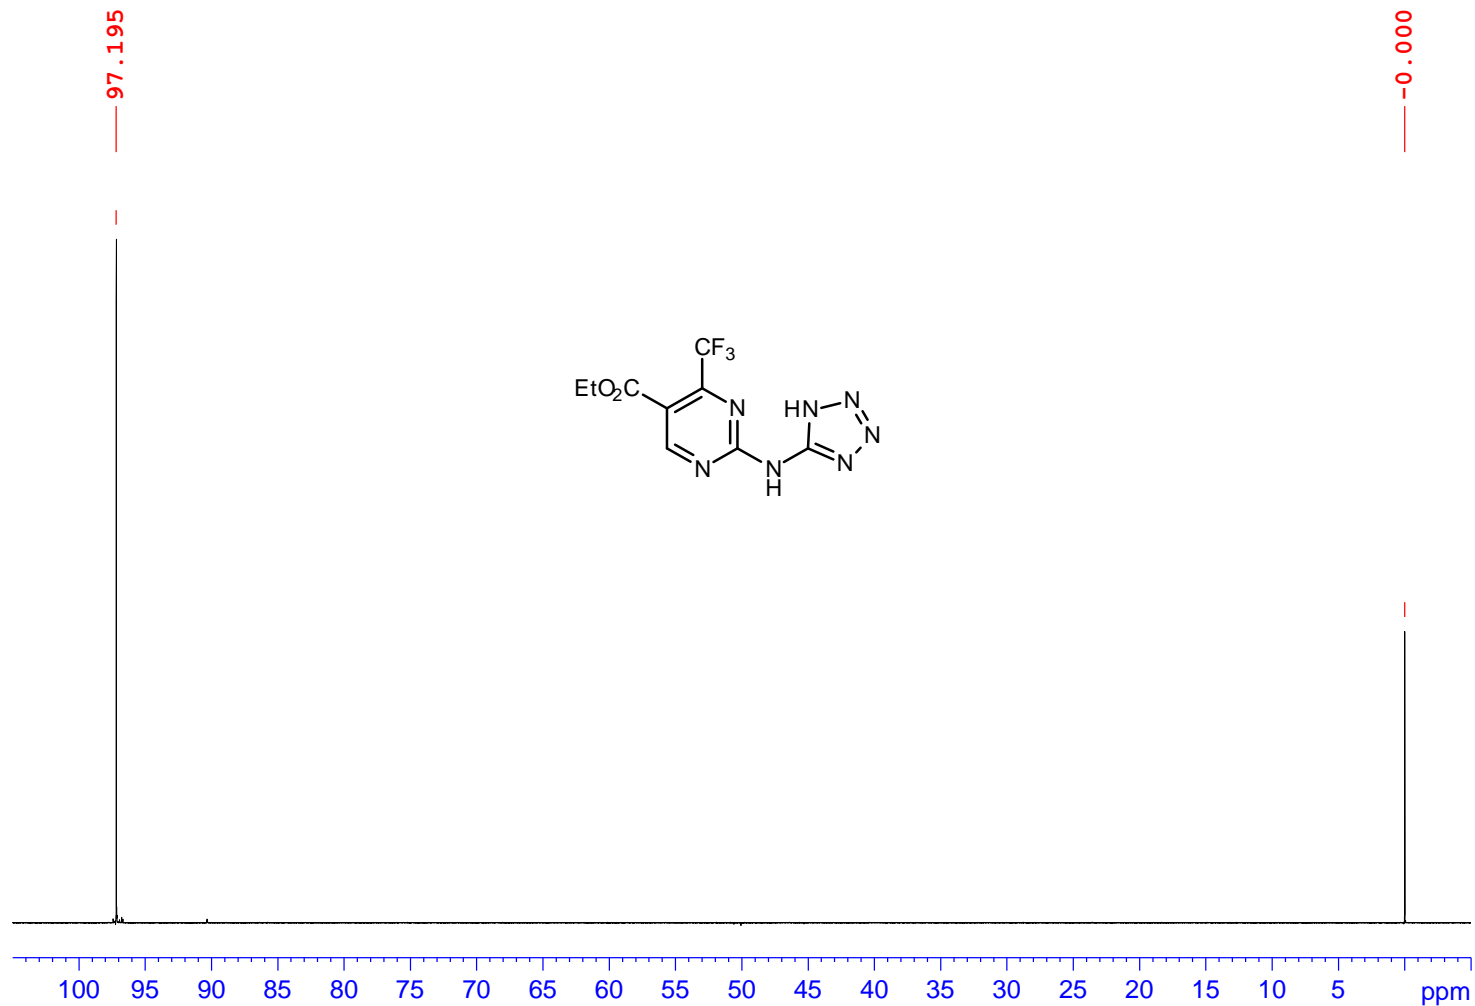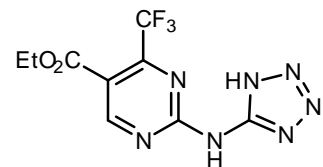

<sup>19</sup>F NMR (376 MHz, DMSO-d<sub>6</sub>) spectrum of **5**.

Current Data Parameters  
 NAME PMV531  
 EXPNO 19  
 PROCNO 1

F2 - Acquisition Parameters  
 Date\_ 20131008  
 Time\_ 13.56  
 INSTRUM DRX400  
 PROBHD 5 mm SEF 19F-1  
 PULPROG zg30  
 TD 262144  
 SOLVENT DMSO  
 NS 16  
 DS 2  
 SW 120.4695 ppm  
 O1P 50.000 ppm  
 FIDRES 0.173002 Hz  
 AQ 2.8901875 sec  
 RG 812.7  
 DW 11.025 usec  
 TE 296.2 K  
 D1 1.00000000 sec  
 MCREST 0 sec  
 MCWRK 0.01500000 sec

==== CHANNEL f1 =====  
 NUC1 19F  
 P1 10.10 usec  
 PL1 0 dB  
 SFO1 376.4561069 MHz

F2 - Processing parameters  
 SI 131072  
 SF 376.4371579 MHz  
 WDW EM  
 SSB 0  
 LB 0 Hz  
 GB 0  
 PC 4.00

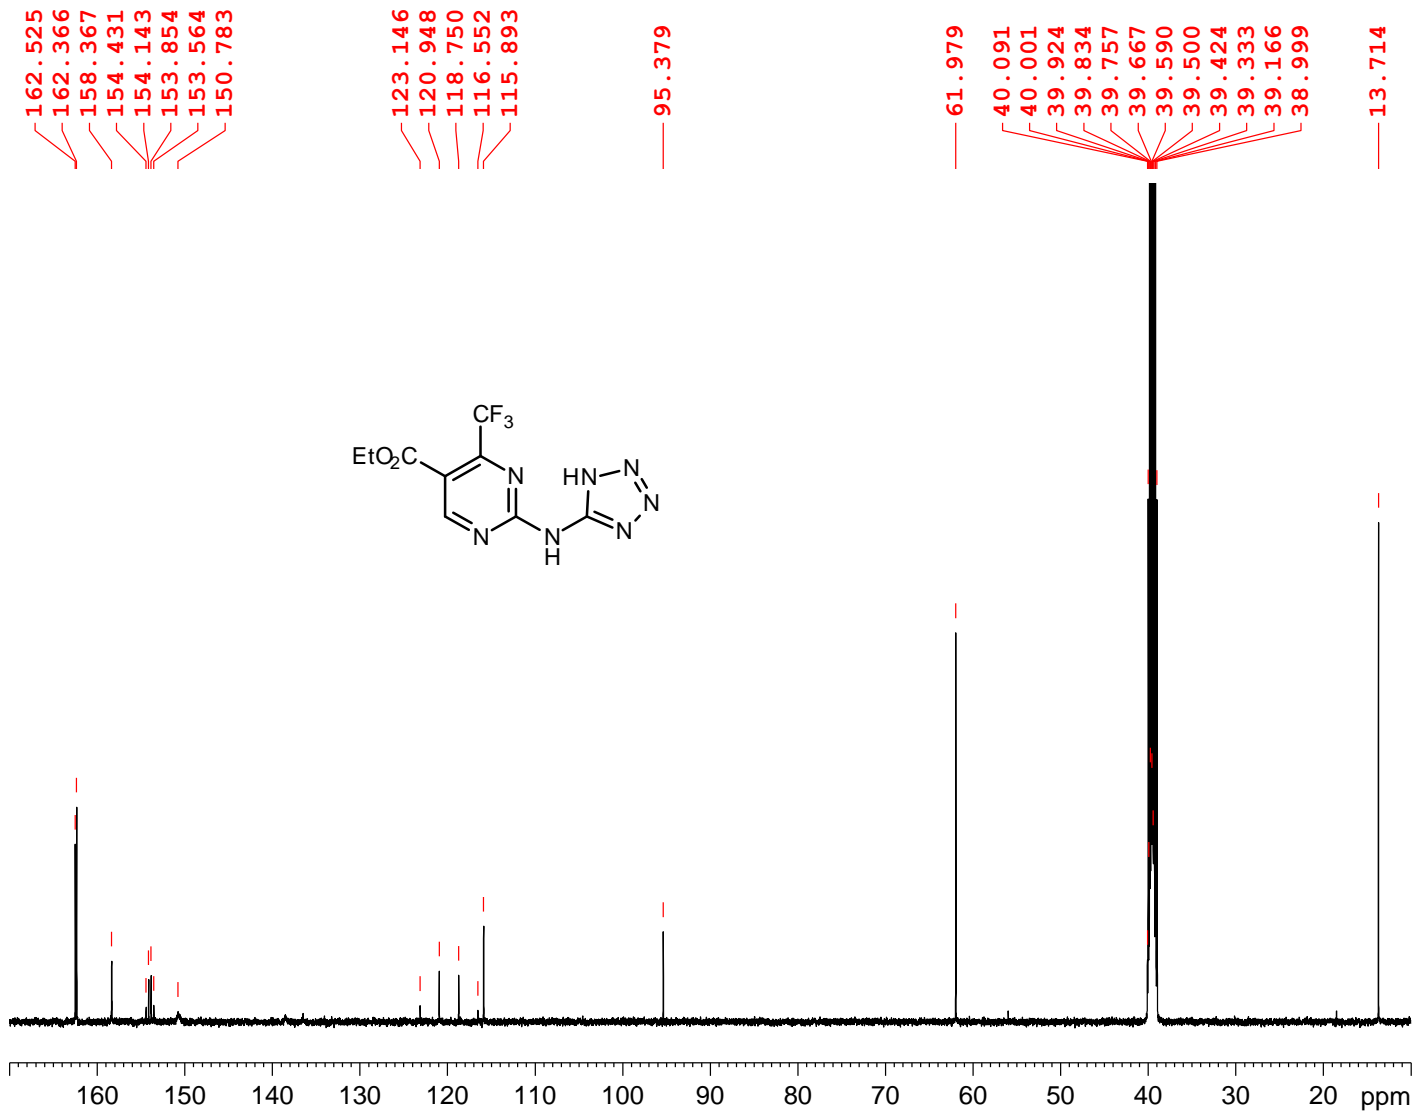

Current Data Parameters  
 NAME PMV531  
 EXPNO 13  
 PROCNO 1

F2 - Acquisition Parameters  
 Date\_ 20131008  
 Time 14.11  
 INSTRUM AV500  
 PROBHD 5 mm PABBO BB-  
 PULPROG zgpg30  
 SOLVENT DMSO  
 TD 65536  
 SW 200.7828 ppm  
 O1P 100.000 ppm  
 FIDRES 0.385323 Hz  
 NS 4096  
 DS 8  
 AQ 1.2976629 sec  
 RG 203  
 TE 297.7 K  
 D1 1.0000000 sec  
 D11 0.0300000 sec  
 TD0 1

==== CHANNEL f1 =====  
 NUC1 13C  
 P1 9.00 usec  
 PL1 0 dB  
 PL1W 115.29558563 W  
 SFO1 125.7703648 MHz

==== CHANNEL f2 =====  
 CPDPRG2 waltz16  
 NUC2 1H  
 PCPD2 75.00 usec  
 PL2 120.00 dB  
 PL12 17.00 dB  
 PL13 20.00 dB  
 PL2W 0 W  
 PL12W 0.40445811 W  
 PL13W 0.20270923 W  
 SFO2 500.1325007 MHz

<sup>13</sup>C NMR (126 MHz, DMSO-d<sub>6</sub>) spectrum of 5.

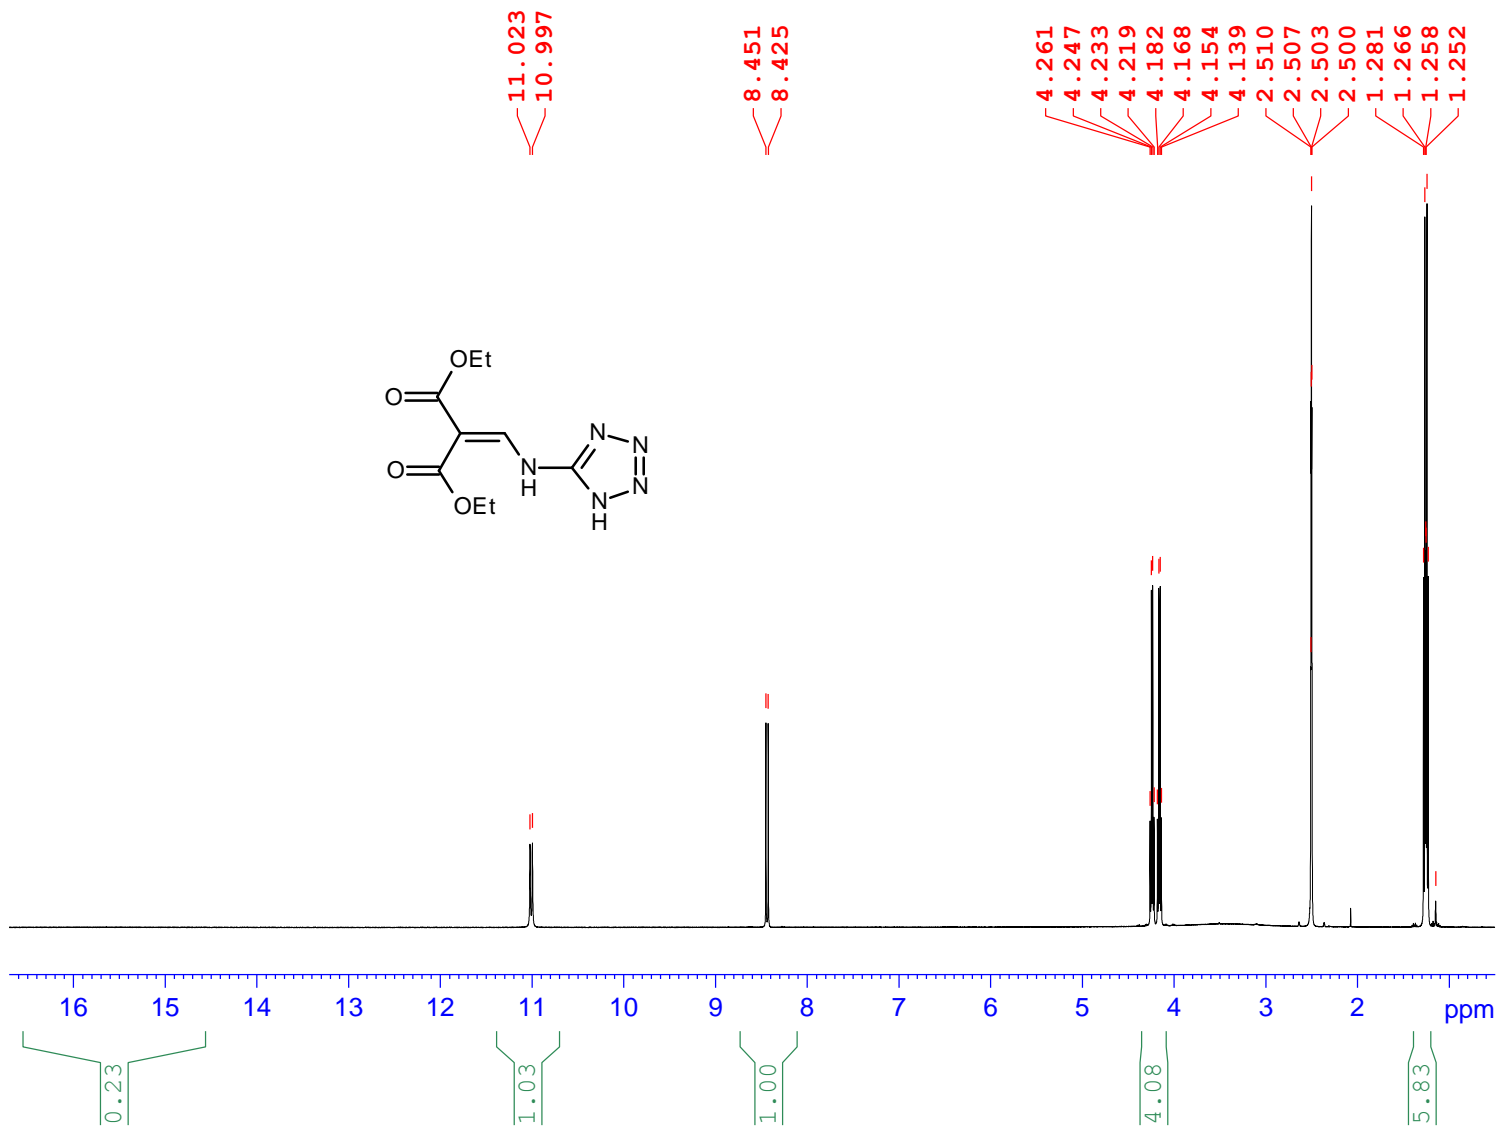

Current Data Parameters  
 NAME PMV5481  
 EXPNO 1  
 PROCNO 1

F2 - Acquisition Parameters  
 Date\_ 20140404  
 Time 14.16  
 INSTRUM AV500  
 PROBHD 5 mm PABBO BB-  
 PULPROG zg30  
 SOLVENT DMSO  
 TD 32768  
 SW 18.0240 ppm  
 O1P 8.000 ppm  
 FIDRES 0.275098 Hz  
 NS 16  
 DS 2  
 AQ 1.8175818 sec  
 RG 203  
 TE 296.6 K  
 D1 1.00000000 sec  
 TD0 1

===== CHANNEL f1 =====  
 NUC1 1H  
 P1 12.00 usec  
 PL1 1.00 dB  
 PL1W 16.10176659 W  
 SFO1 500.1340010 MHz

F2 - Processing parameters  
 SI 32768  
 SF 500.1300032 MHz  
 WDW EM  
 SSB 0  
 LB 0 Hz  
 GB 0  
 PC 4.00

<sup>1</sup>H NMR (500 MHz, DMSO-d<sub>6</sub>) spectrum of **6**.

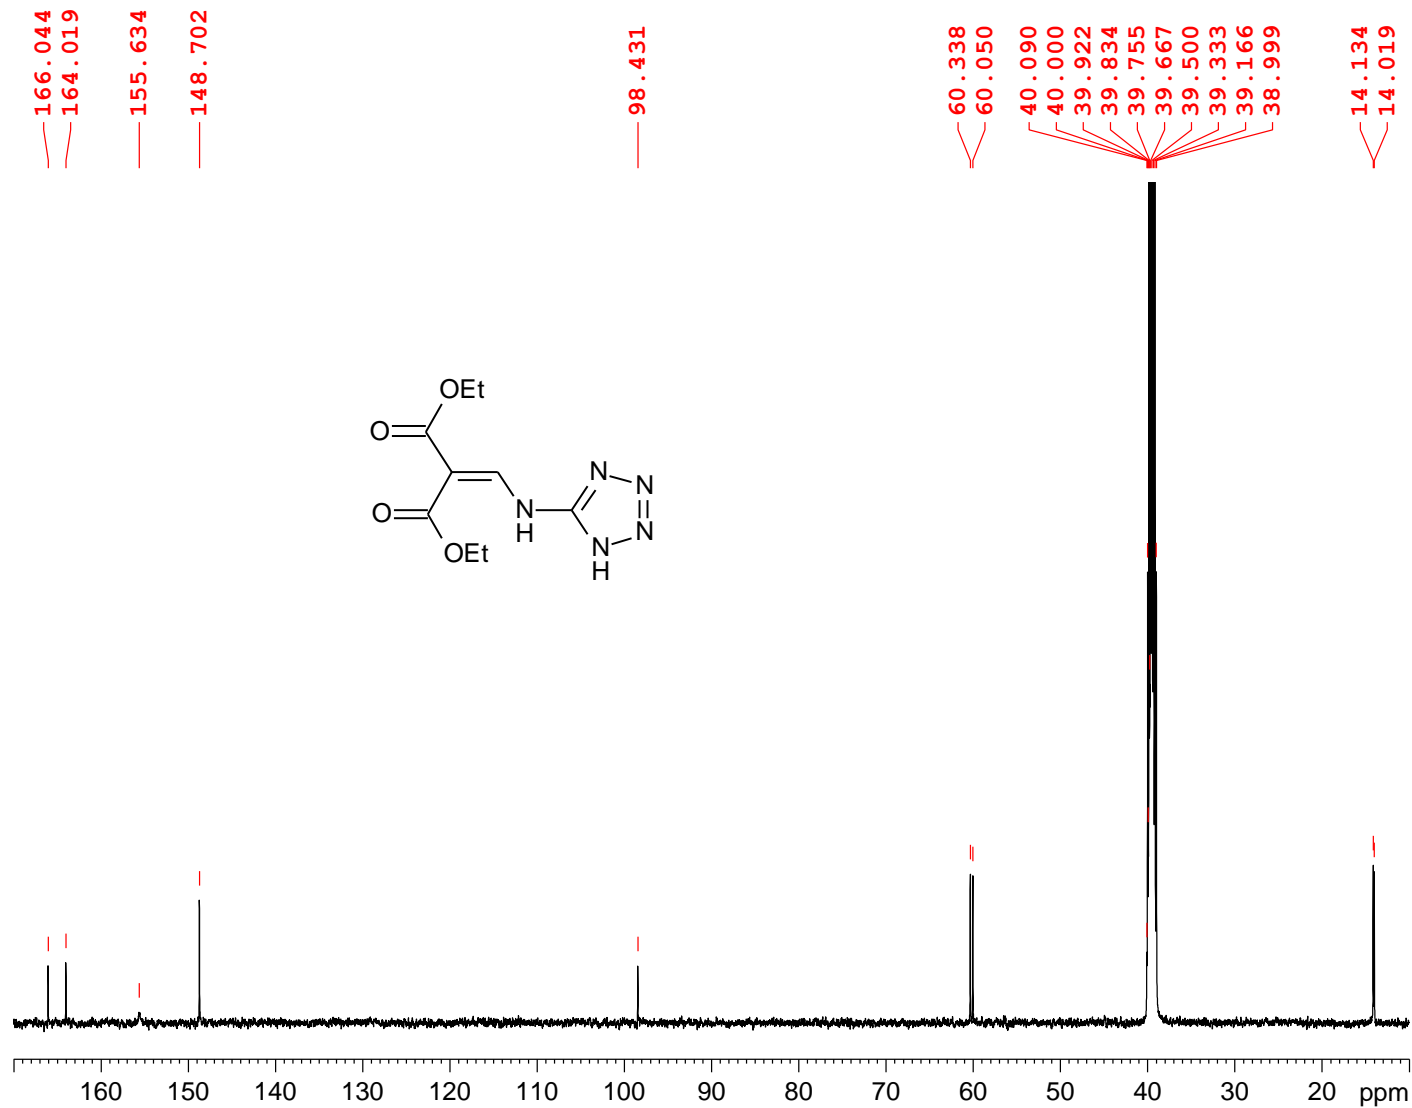

<sup>13</sup>C NMR (126 MHz, DMSO-d<sub>6</sub>) spectrum of **6**.

Current Data Parameters  
 NAME PMV5481  
 EXPNO 13  
 PROCNO 1

F2 - Acquisition Parameters  
 Date\_ 20140404  
 Time\_ 13.27  
 INSTRUM AV500  
 PROBHD 5 mm PABBO BB-  
 PULPROG zgpg30  
 SOLVENT DMSO  
 TD 32768  
 SW 200.7828 ppm  
 O1P 100.000 ppm  
 FIDRES 0.770646 Hz  
 NS 2048  
 DS 8  
 AQ 0.6488564 sec  
 RG 203  
 TE 296.8 K  
 D1 0.80000001 sec  
 D11 0.03000000 sec  
 TD0 1

==== CHANNEL f1 =====  
 NUC1 13C  
 P1 9.00 usec  
 PL1 0 dB  
 PL1W 115.29558563 W  
 SFO1 125.7703648 MHz

==== CHANNEL f2 =====  
 CPDPRG2 waltz16  
 NUC2 1H  
 PCPD2 75.00 usec  
 PL2 1.00 dB  
 PL12 17.00 dB  
 PL13 20.00 dB  
 PL2W 16.10176659 W  
 PL12W 0.40445811 W  
 PL13W 0.20270923 W  
 SFO2 500.1325007 MHz

F2 - Processing parameters  
 SI 32768  
 SF 125.7578520 MHz  
 WDW EM  
 SSB 0  
 LB 3.00 Hz  
 GB 0  
 PC 1.40



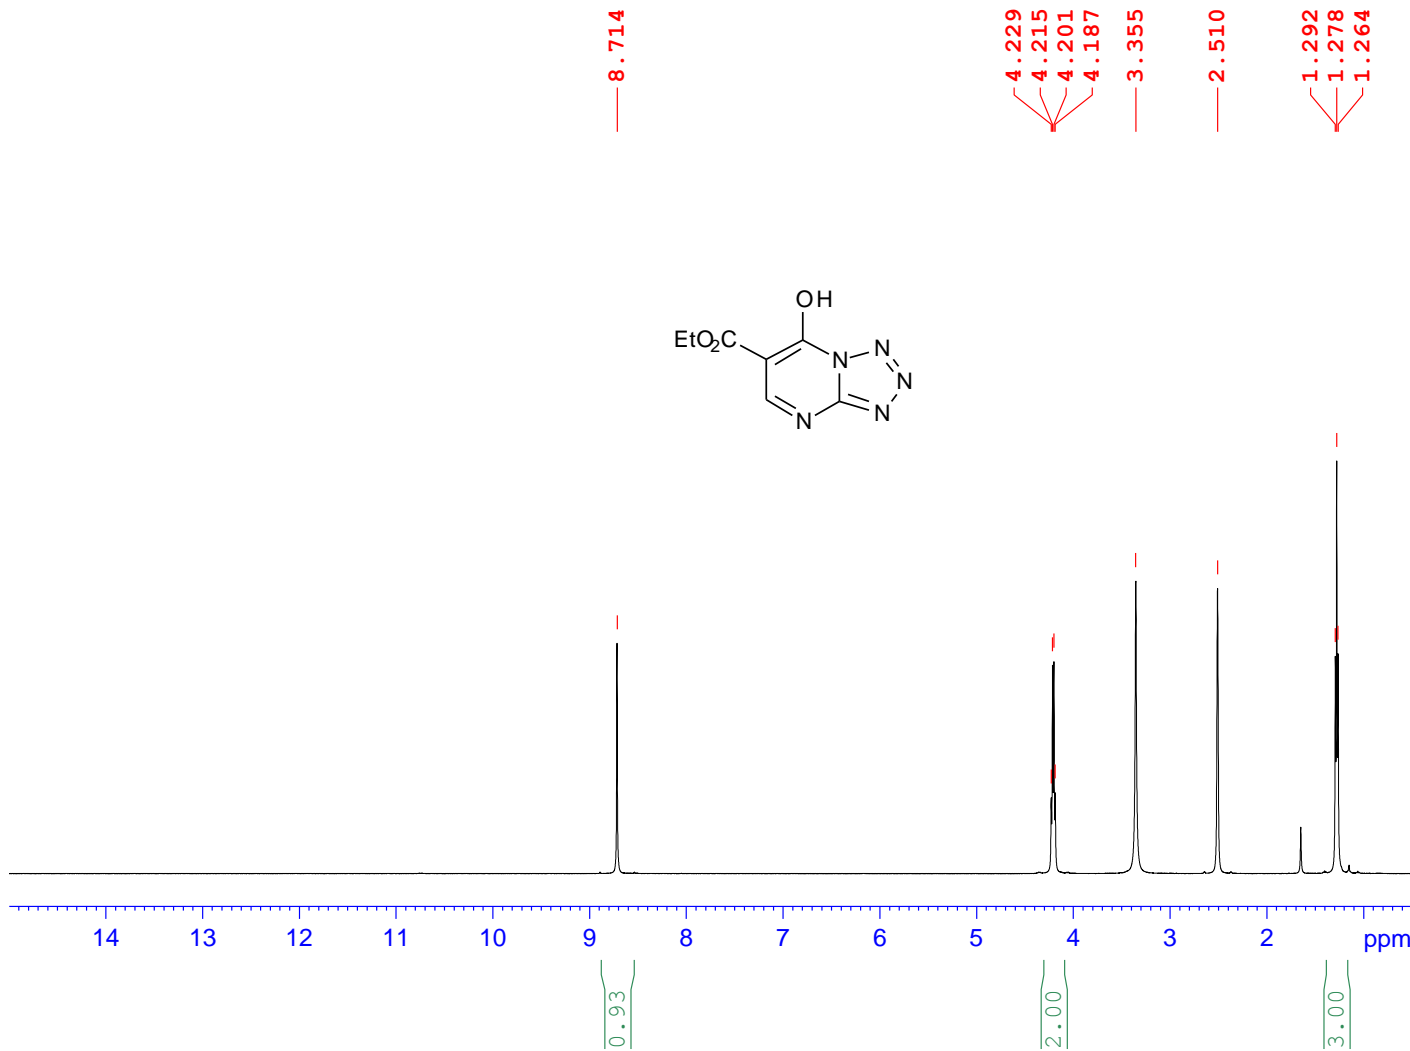

```
Current Data Parameters
NAME          PMV4236
EXPNO         1
PROCNO        1

F2 - Acquisition Parameters
Date_         20141217
Time          11.35
INSTRUM       AV500
PROBHD        5 mm PABBO BB-
PULPROG       zg30
SOLVENT       DMSO
TD            32768
SW            19.9946 ppm
O1P           9.000 ppm
FIDRES        0.305176 Hz
NS            16
DS            2
AQ            1.6384500 sec
RG            161
TE            297.8 K
D1            2.00000000 sec
TD0           1
```

```
===== CHANNEL f1 =====
NUC1          1H
P1            12.00 usec
PL1           1.00 dB
PL1W          16.10176659 W
SFO1          500.1345012 MHz
```

```
F2 - Processing parameters
SI            32768
SF            500.1300001 MHz
WDW           EM
SSB           0
LB            0 Hz
GB            0
PC            4.00
```

<sup>1</sup>H NMR (500 MHz, DMSO-d<sub>6</sub>) spectrum of 7.

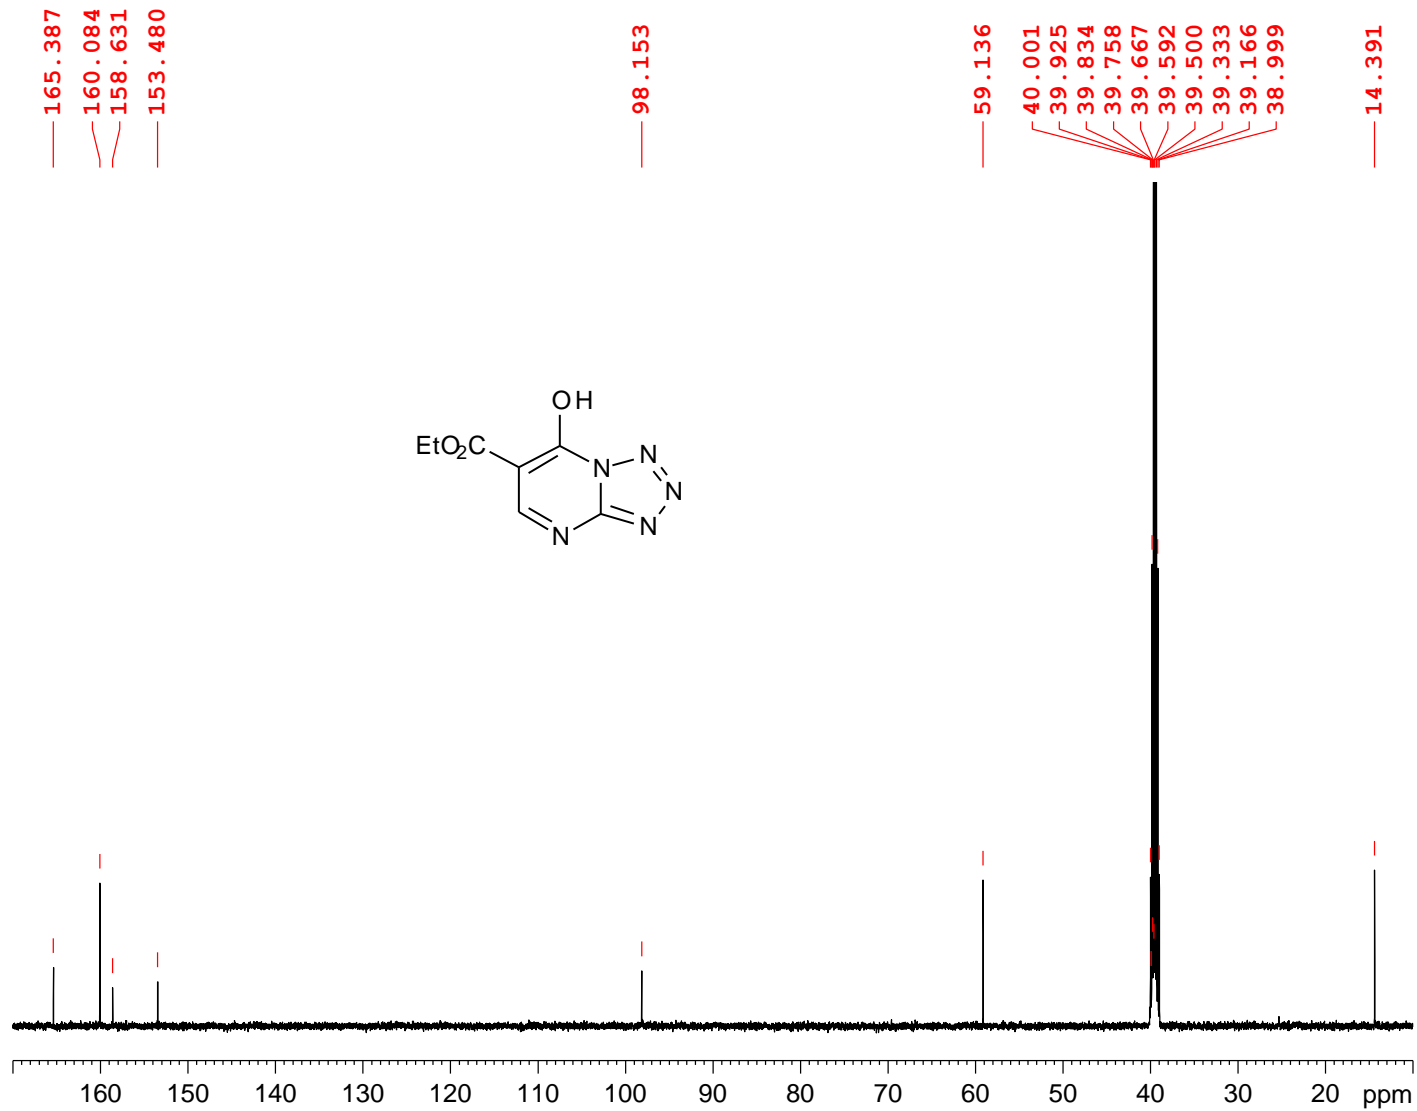

<sup>13</sup>C NMR (126 MHz, DMSO-d<sub>6</sub>) spectrum of 7.

Current Data Parameters  
 NAME PMV4236  
 EXPNO 13  
 PROCNO 1

F2 - Acquisition Parameters  
 Date 20141222  
 Time 12.50  
 INSTRUM AV500  
 PROBHD 5 mm PABBO BB-  
 PULPROG zgpg30  
 SOLVENT DMSO  
 TD 32768  
 SW 200.7828 ppm  
 O1P 100.000 ppm  
 FIDRES 0.770646 Hz  
 NS 512  
 DS 8  
 AQ 0.6488564 sec  
 RG 203  
 TE 297.6 K  
 D1 0.80000001 sec  
 D11 0.03000000 sec  
 TD0 1

==== CHANNEL f1 =====  
 NUC1 13C  
 P1 9.00 usec  
 PL1 0 dB  
 PL1W 115.29558563 W  
 SFO1 125.7703648 MHz

==== CHANNEL f2 =====  
 CPDPRG2 waltz16  
 NUC2 1H  
 PCPD2 75.00 usec  
 PL2 120.00 dB  
 PL12 17.00 dB  
 PL13 20.00 dB  
 PL2W 0 W  
 PL12W 0.40445811 W  
 PL13W 0.20270923 W  
 SFO2 500.1325007 MHz

F2 - Processing parameters  
 SI 32768  
 SF 125.7578506 MHz  
 WDW EM  
 SSB 0  
 LB 1.00 Hz  
 GB 0  
 PC 1.00

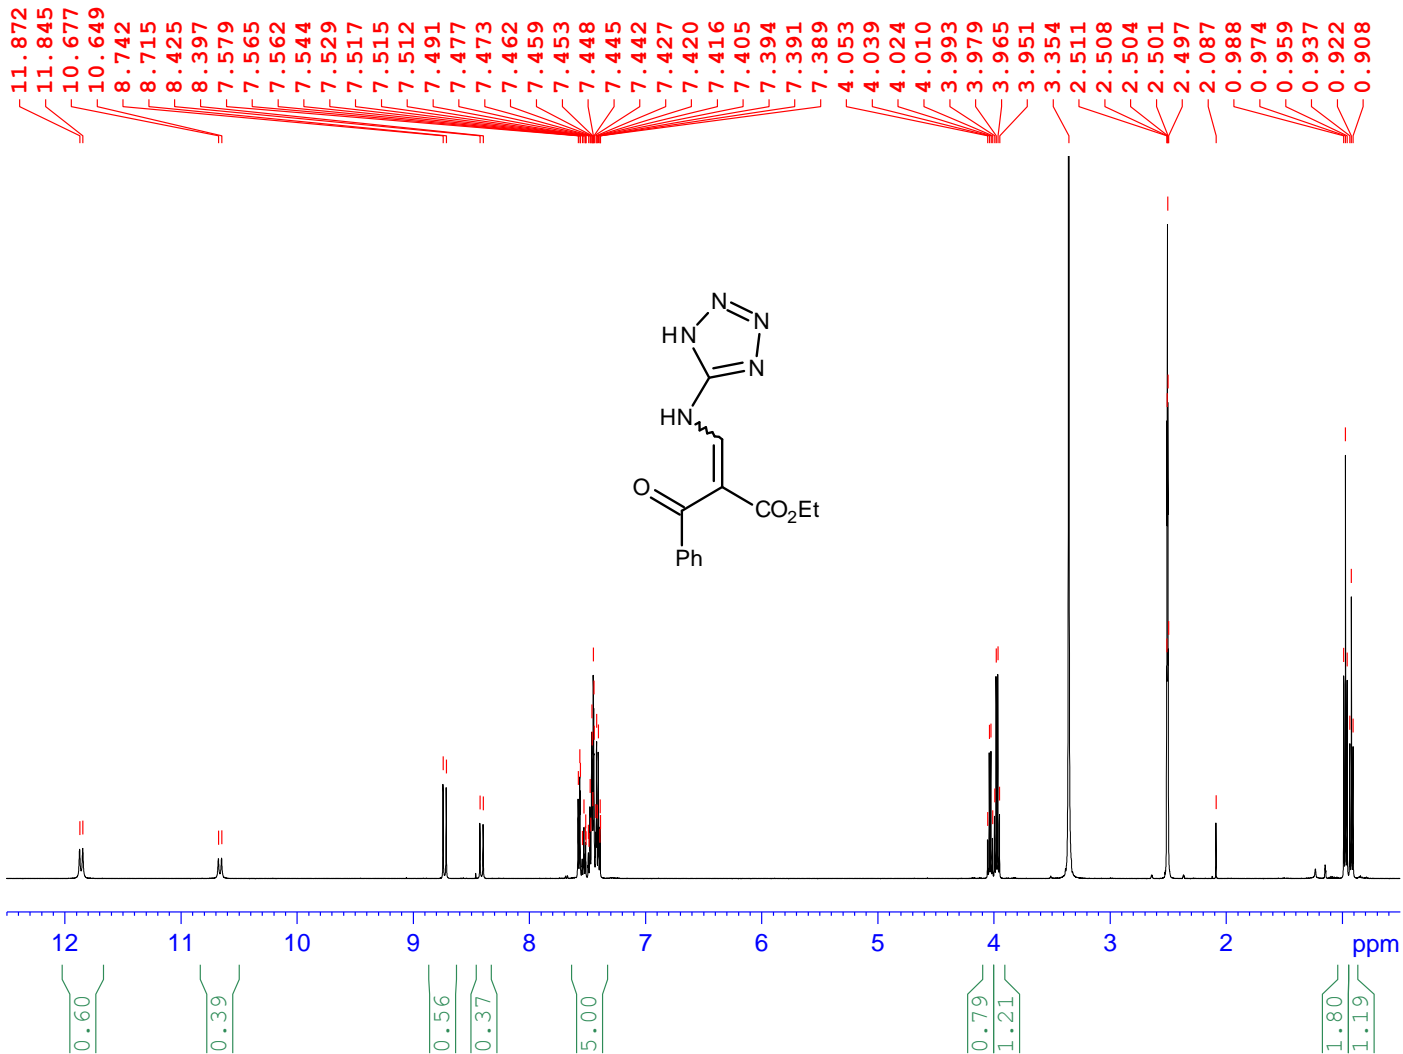

Current Data Parameters  
 NAME PMV5344  
 EXPNO 1  
 PROCNO 1

F2 - Acquisition Parameters  
 Date\_ 20140508  
 Time\_ 12.47  
 INSTRUM AV500  
 PROBHD 5 mm PABBO BB-  
 PULPROG zg30  
 SOLVENT DMSO  
 TD 32768  
 SW 16.0214 ppm  
 O1P 7.000 ppm  
 FIDRES 0.244532 Hz  
 NS 16  
 DS 2  
 AQ 2.0447731 sec  
 RG 144  
 TE 296.7 K  
 D1 1.0000000 sec  
 TD0 1

===== CHANNEL f1 =====  
 NUC1 1H  
 P1 12.00 usec  
 PL1 1.00 dB  
 PL1W 16.10176659 W  
 SFO1 500.1335009 MHz

F2 - Processing parameters  
 SI 32768  
 SF 500.1300031 MHz  
 WDW EM  
 SSB 0  
 LB 0 Hz  
 GB 0  
 PC 4.00

<sup>1</sup>H NMR (500 MHz, DMSO-d<sub>6</sub>) spectrum of 9.

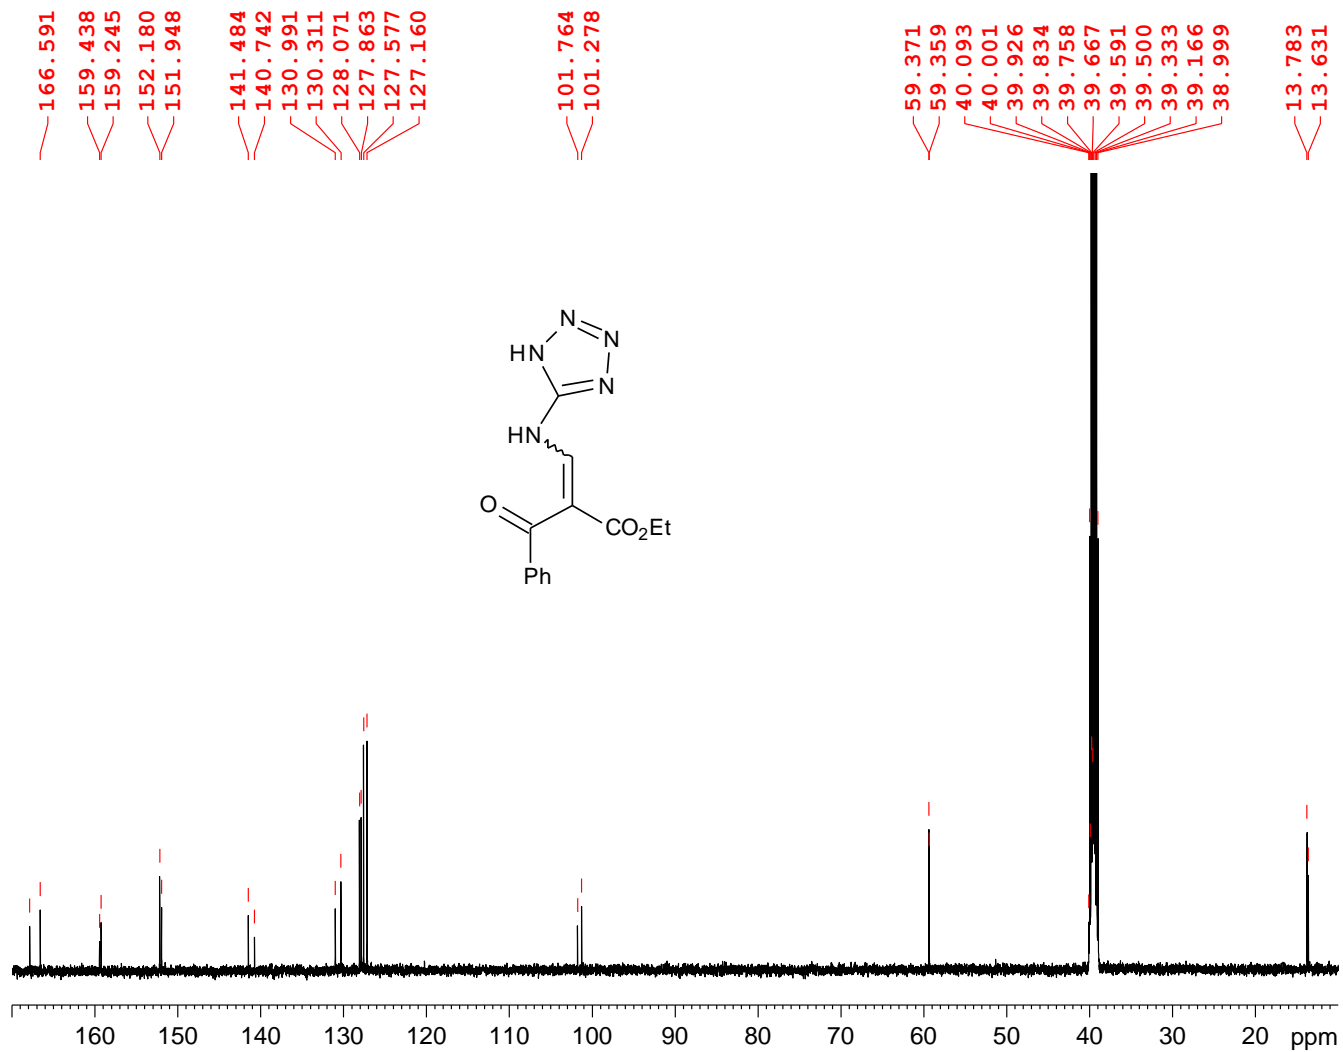

Current Data Parameters  
 NAME PMV5344  
 EXPNO 13  
 PROCNO 1

F2 - Acquisition Parameters  
 Date\_ 20140508  
 Time\_ 12.07  
 INSTRUM AV500  
 PROBHD 5 mm PABBO BB-  
 PULPROG zgpg30  
 SOLVENT DMSO  
 TD 32768  
 SW 200.7828 ppm  
 O1P 100.000 ppm  
 FIDRES 0.770646 Hz  
 NS 2048  
 DS 8  
 AQ 0.6488564 sec  
 RG 203  
 TE 296.8 K  
 D1 0.80000001 sec  
 D11 0.03000000 sec  
 TD0 1

==== CHANNEL f1 =====  
 NUC1 13C  
 P1 9.00 usec  
 PL1 0 dB  
 PL1W 115.29558563 W  
 SFO1 125.7703648 MHz

==== CHANNEL f2 =====  
 CPDPRG2 waltz16  
 NUC2 1H  
 PCPD2 75.00 usec  
 PL2 1.00 dB  
 PL12 17.00 dB  
 PL13 20.00 dB  
 PL2W 16.10176659 W  
 PL12W 0.40445811 W  
 PL13W 0.20270923 W  
 SFO2 500.1325007 MHz

F2 - Processing parameters  
 SI 32768  
 SF 125.7578503 MHz  
 WDW EM  
 SSB 0  
 LB 1.00 Hz  
 GB 0  
 PC 1.40

<sup>13</sup>C NMR (126 MHz, DMSO-d<sub>6</sub>) spectrum of 9.

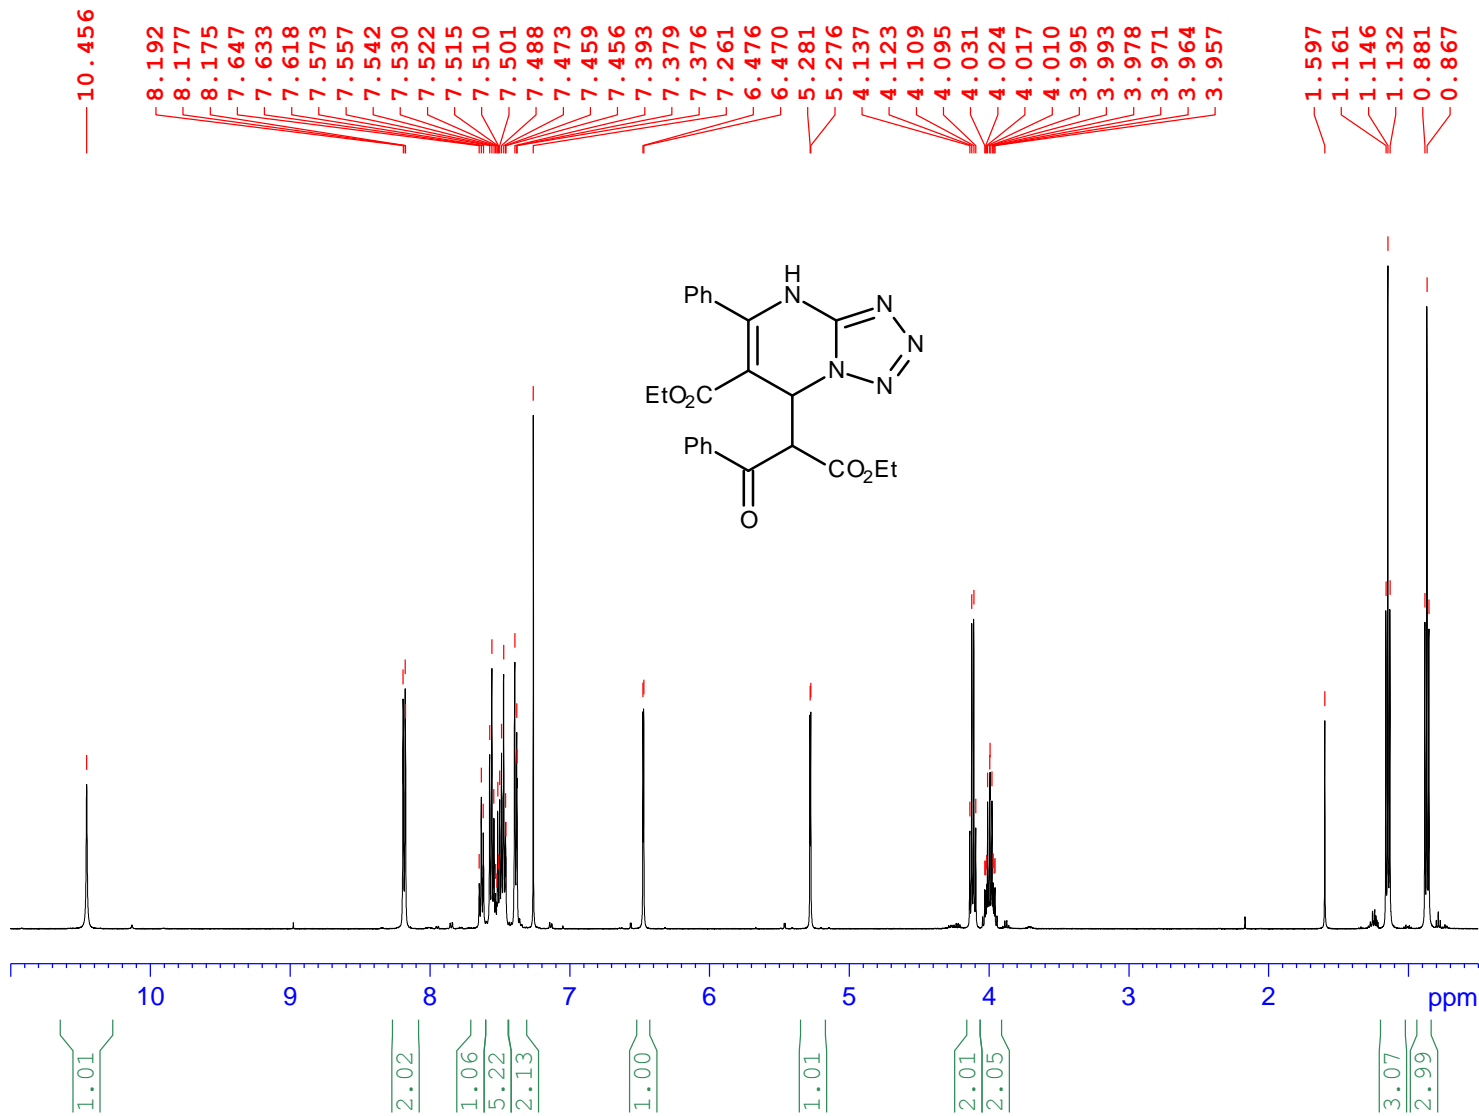

Current Data Parameters  
NAME PMV53421  
EXPNO 1  
PROCNO 1

F2 - Acquisition Parameters  
Date\_ 20140327  
Time 13.52  
INSTRUM AV500  
PROBHD 5 mm PABBO BB-  
PULPROG zg30  
SOLVENT CDCl3  
TD 32768  
SW 14.0019 ppm  
O1P 6.000 ppm  
FIDRES 0.213709 Hz  
NS 16  
DS 2  
AQ 2.3396852 sec  
RG 203  
TE 296.6 K  
D1 1.00000000 sec  
TD0 1

===== CHANNEL f1 =====  
NUC1 1H  
P1 12.00 usec  
PL1 1.00 dB  
PL1W 16.10176659 W  
SFO1 500.1330008 MHz

F2 - Processing parameters  
SI 32768  
SF 500.1300136 MHz  
WDW EM  
SSB 0  
LB 0 Hz  
GB 0  
PC 4.00

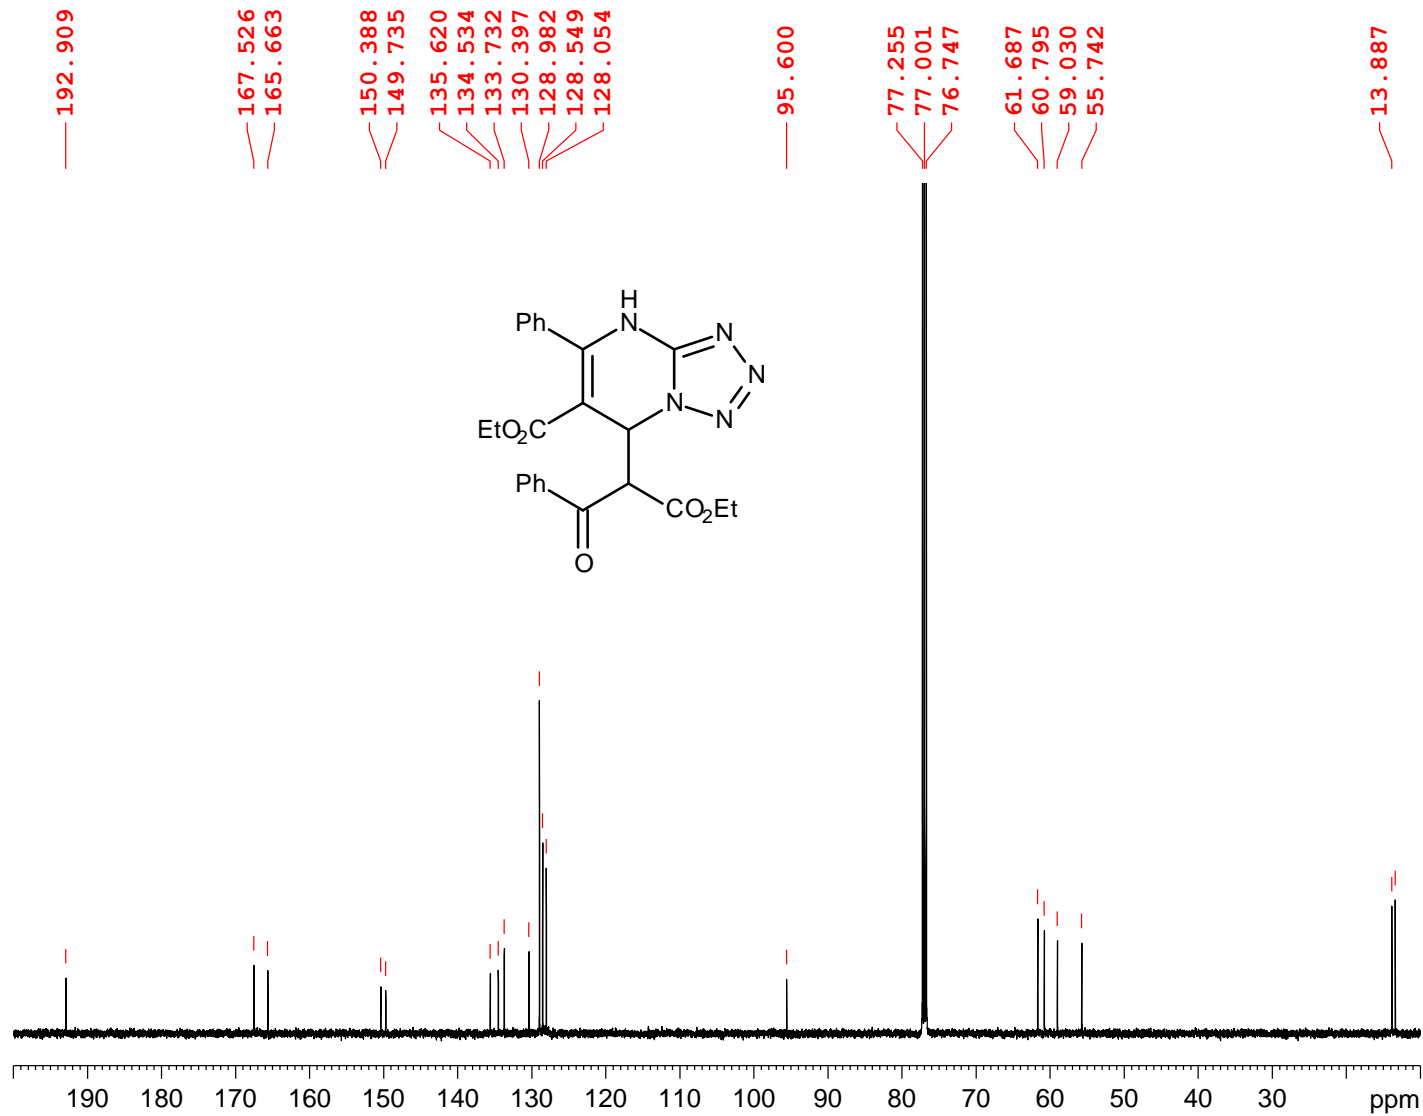

Current Data Parameters  
 NAME PMV53421  
 EXPNO 13  
 PROCNO 1

F2 - Acquisition Parameters  
 Date\_ 20140328  
 Time 14.03  
 INSTRUM AV500  
 PROBHD 5 mm PABBO BB-  
 PULPROG zgpg30  
 SOLVENT CDCl3  
 TD 65536  
 SW 219.2360 ppm  
 OlP 105.000 ppm  
 FIDRES 0.420739 Hz  
 NS 1024  
 DS 8  
 AQ 1.1884362 sec  
 RG 203  
 TE 297.6 K  
 D1 0.80000001 sec  
 D11 0.03000000 sec  
 TD0 1

==== CHANNEL f1 =====  
 NUC1 13C  
 P1 9.00 usec  
 PL1 0 dB  
 PL1W 115.29558563 W  
 SFO1 125.7709936 MHz

==== CHANNEL f2 =====  
 CPDPRG2 waltz16  
 NUC2 1H  
 PCPD2 75.00 usec  
 PL2 1.00 dB  
 PL12 17.00 dB  
 PL13 20.00 dB  
 PL2W 16.10176659 W  
 PL12W 0.40445811 W  
 PL13W 0.20270923 W  
 SFO2 500.1325007 MHz

F2 - Processing parameters  
 SI 65536  
 SF 125.7577918 MHz  
 WDW EM  
 SSB 0  
 LB 1.00 Hz  
 GB 0  
 PC 1.40

<sup>13</sup>C NMR (126 MHz, CDCl<sub>3</sub>) spectrum of 10.

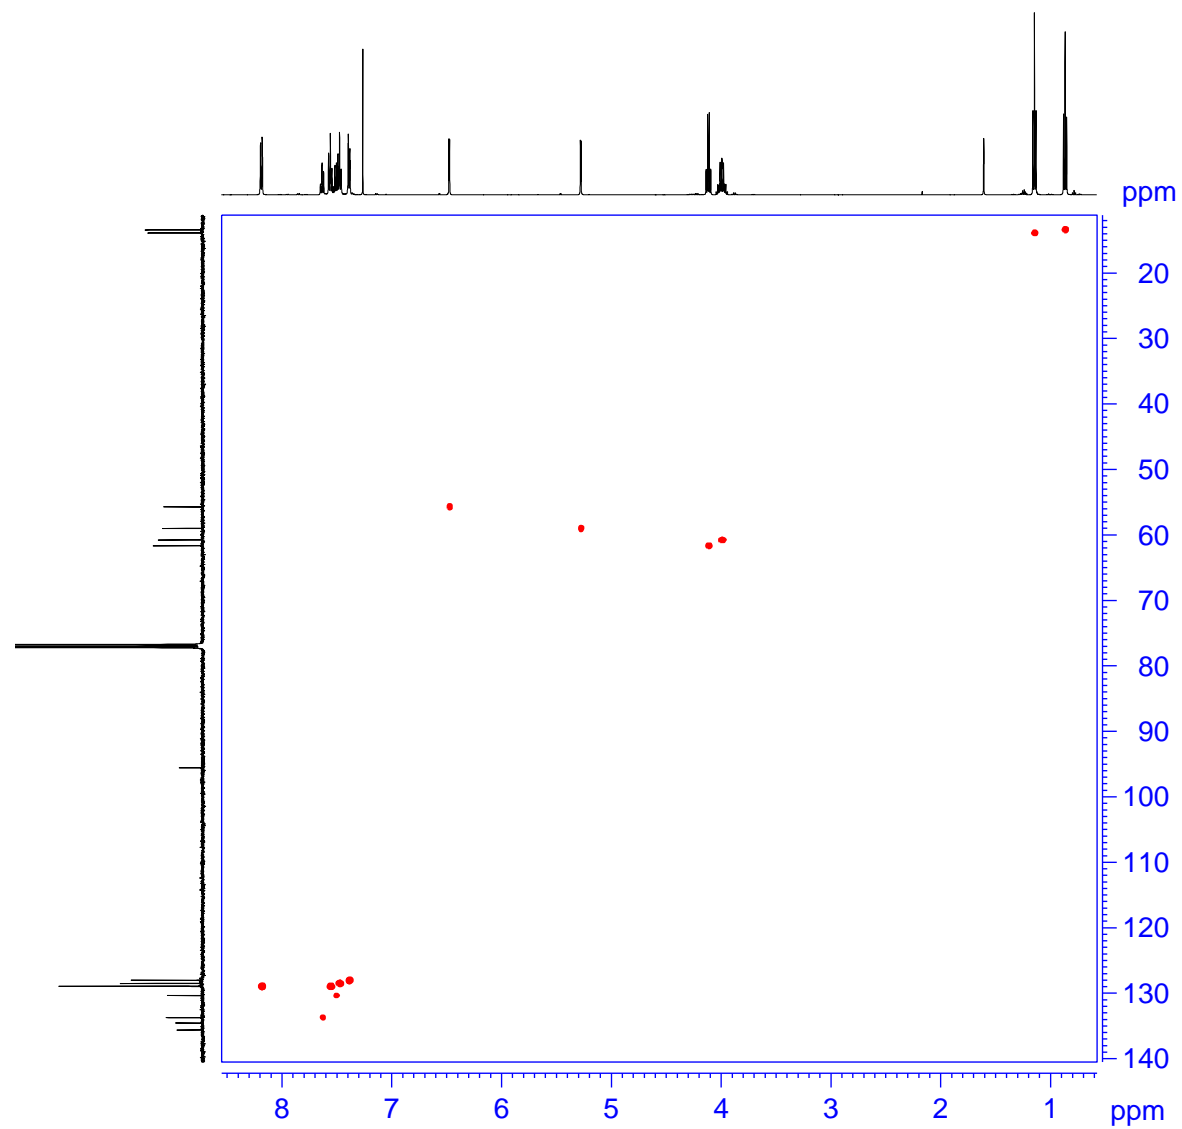

2D  $^1\text{H}$ - $^{13}\text{C}$  HSQC (500 MHz,  $\text{CDCl}_3$ ) spectrum of **10**.

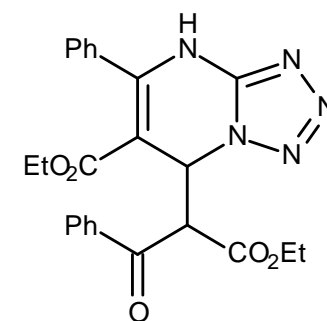

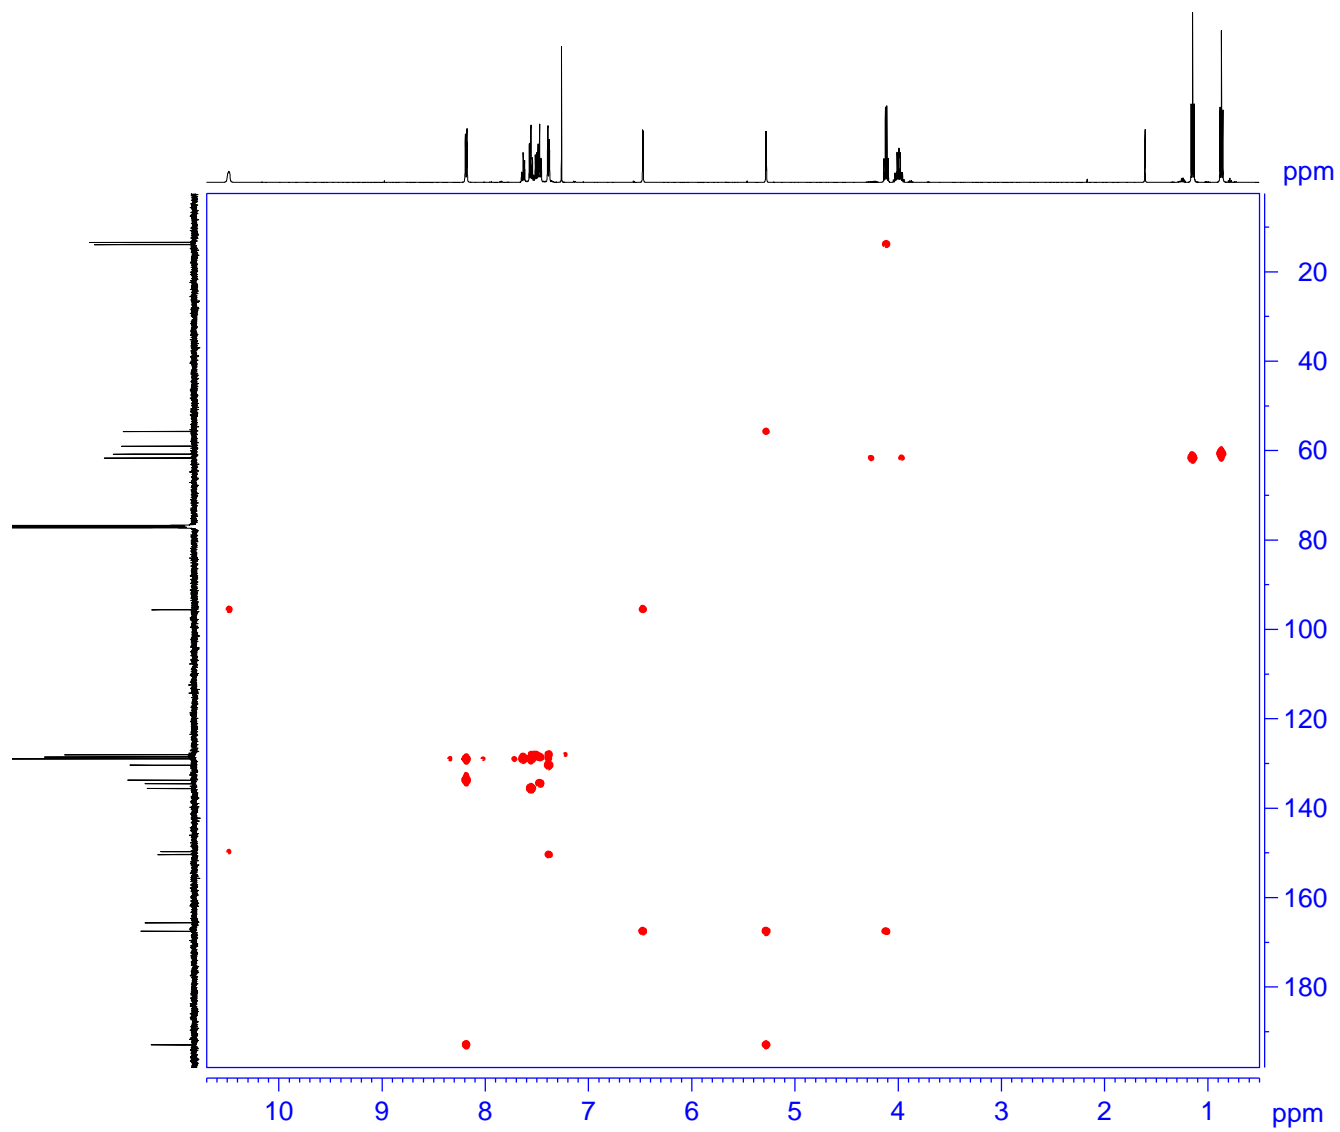

2D  $^1\text{H}$ - $^{13}\text{C}$  HMBC (500 MHz,  $\text{CDCl}_3$ ) spectrum of **10**.

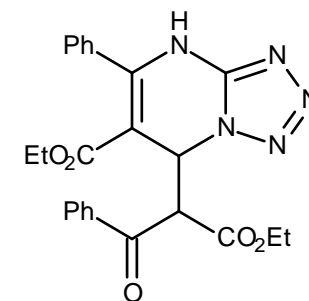



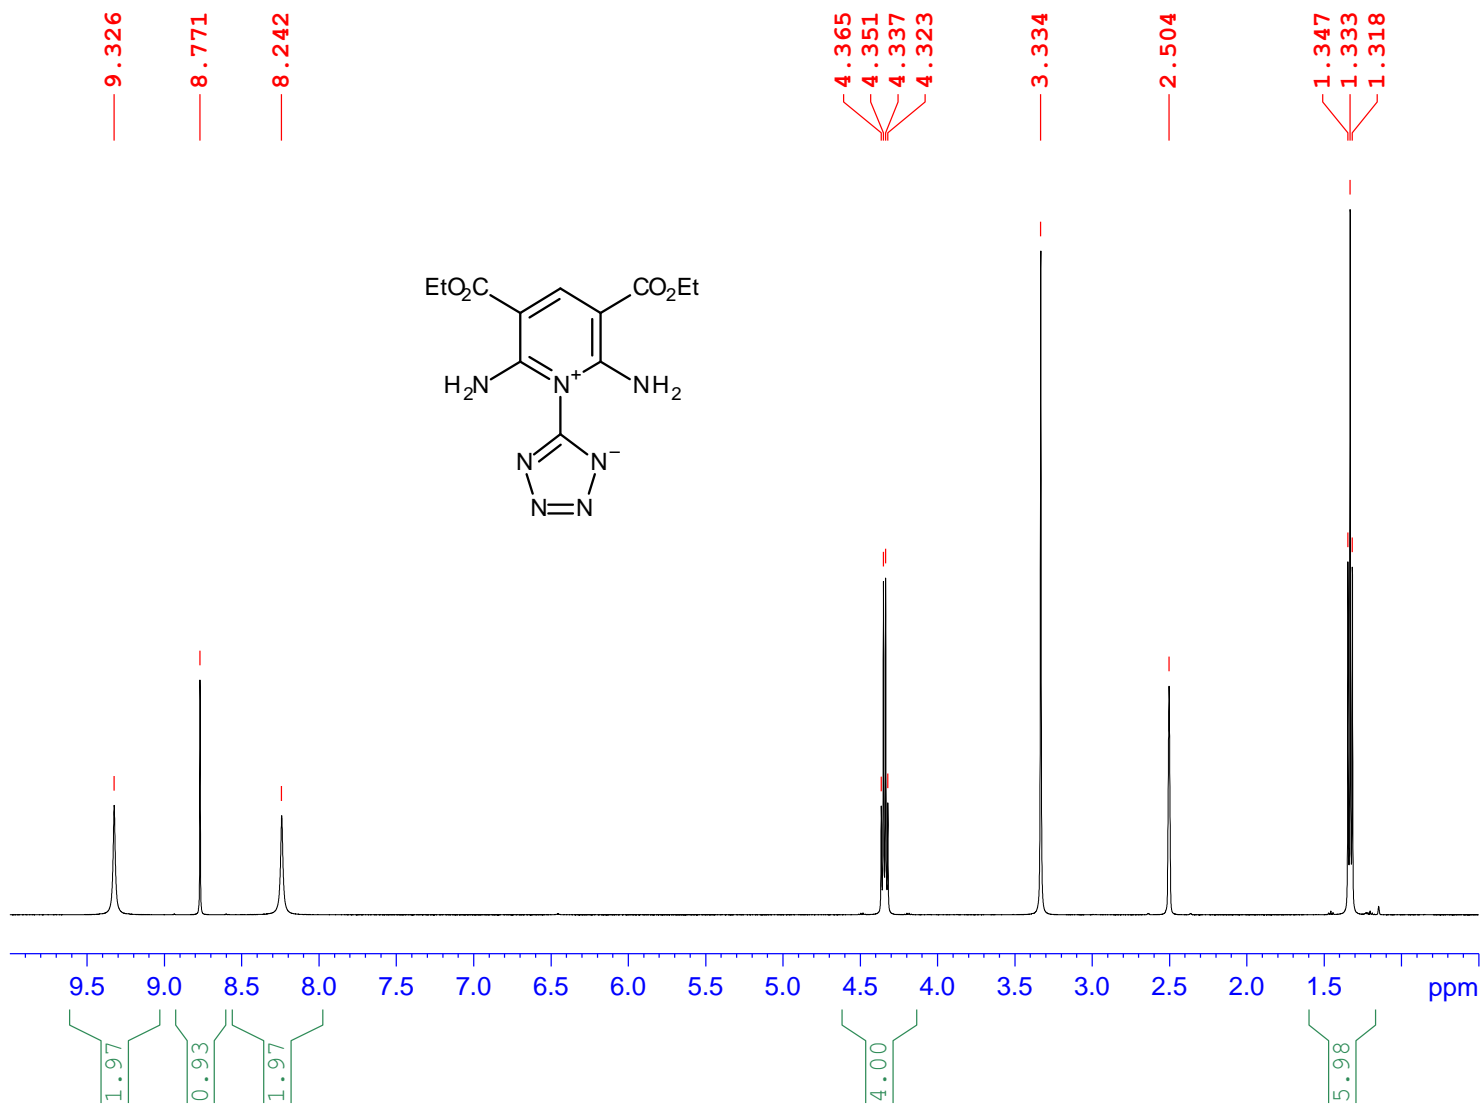

Current Data Parameters  
 NAME PMV5083  
 EXPNO 1  
 PROCNO 1

F2 - Acquisition Parameters  
 Date\_ 20130919  
 Time\_ 12.58  
 INSTRUM AV500  
 PROBHD 5 mm PABBO BB-  
 PULPROG zg30  
 SOLVENT DMSO  
 TD 32768  
 SW 16.0214 ppm  
 O1P 7.000 ppm  
 FIDRES 0.244532 Hz  
 NS 8  
 DS 2  
 AQ 2.0447731 sec  
 RG 128  
 TE 296.5 K  
 D1 1.00000000 sec  
 TD0 1

===== CHANNEL f1 =====  
 NUC1 1H  
 P1 12.00 usec  
 PL1 1.00 dB  
 PL1W 16.10176659 W  
 SFO1 500.1335009 MHz

F2 - Processing parameters  
 SI 32768  
 SF 500.1300026 MHz  
 WDW EM  
 SSB 0  
 LB 0 Hz  
 GB 0  
 PC 4.00

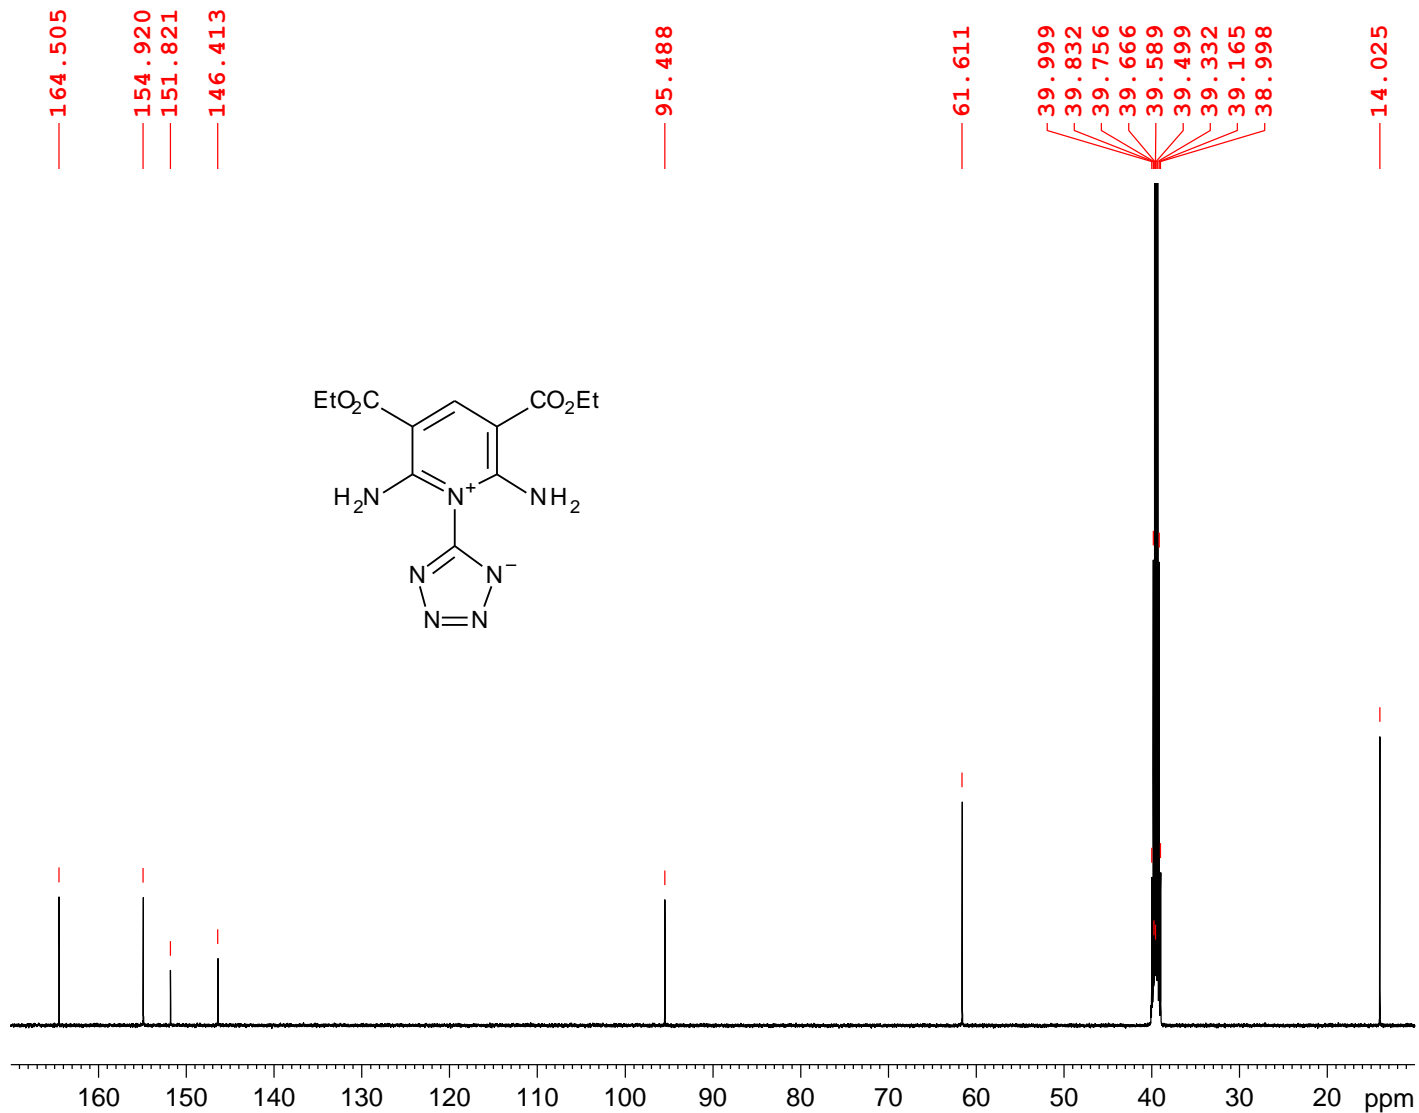

Current Data Parameters  
 NAME PMV5083  
 EXPNO 13  
 PROCNO 1

F2 - Acquisition Parameters  
 Date 20130919  
 Time 12.09  
 INSTRUM AV500  
 PROBHD 5 mm PABBO BB-  
 PULPROG zgpg30  
 SOLVENT DMSO  
 TD 32768  
 SW 200.7838 ppm  
 O1P 95.000 ppm  
 FIDRES 0.770646 Hz  
 NS 2048  
 DS 8  
 AQ 0.6488564 sec  
 RG 203  
 TE 297.6 K  
 D1 1.00000000 sec  
 D11 0.03000000 sec  
 TD0 2

===== CHANNEL f1 =====  
 NUC1 13C  
 P1 9.00 usec  
 PL1 0 dB  
 PL1W 115.29558563 W  
 SFO1 125.7697360 MHz

===== CHANNEL f2 =====  
 CPDPRG2 waltz16  
 NUC2 1H  
 PCPD2 75.00 usec  
 PL2 120.00 dB  
 PL12 17.00 dB  
 PL13 20.00 dB  
 PL2W 0 W  
 PL12W 0.40445811 W  
 PL13W 0.20270923 W  
 SFO2 500.1325007 MHz

F2 - Processing parameters  
 SI 32768  
 SF 125.7578508 MHz  
 WDW EM  
 SSB 0  
 LB 1.00 Hz  
 GB 0  
 PC 1.40

<sup>13</sup>C NMR (126 MHz, DMSO-d<sub>6</sub>) spectrum of 11.

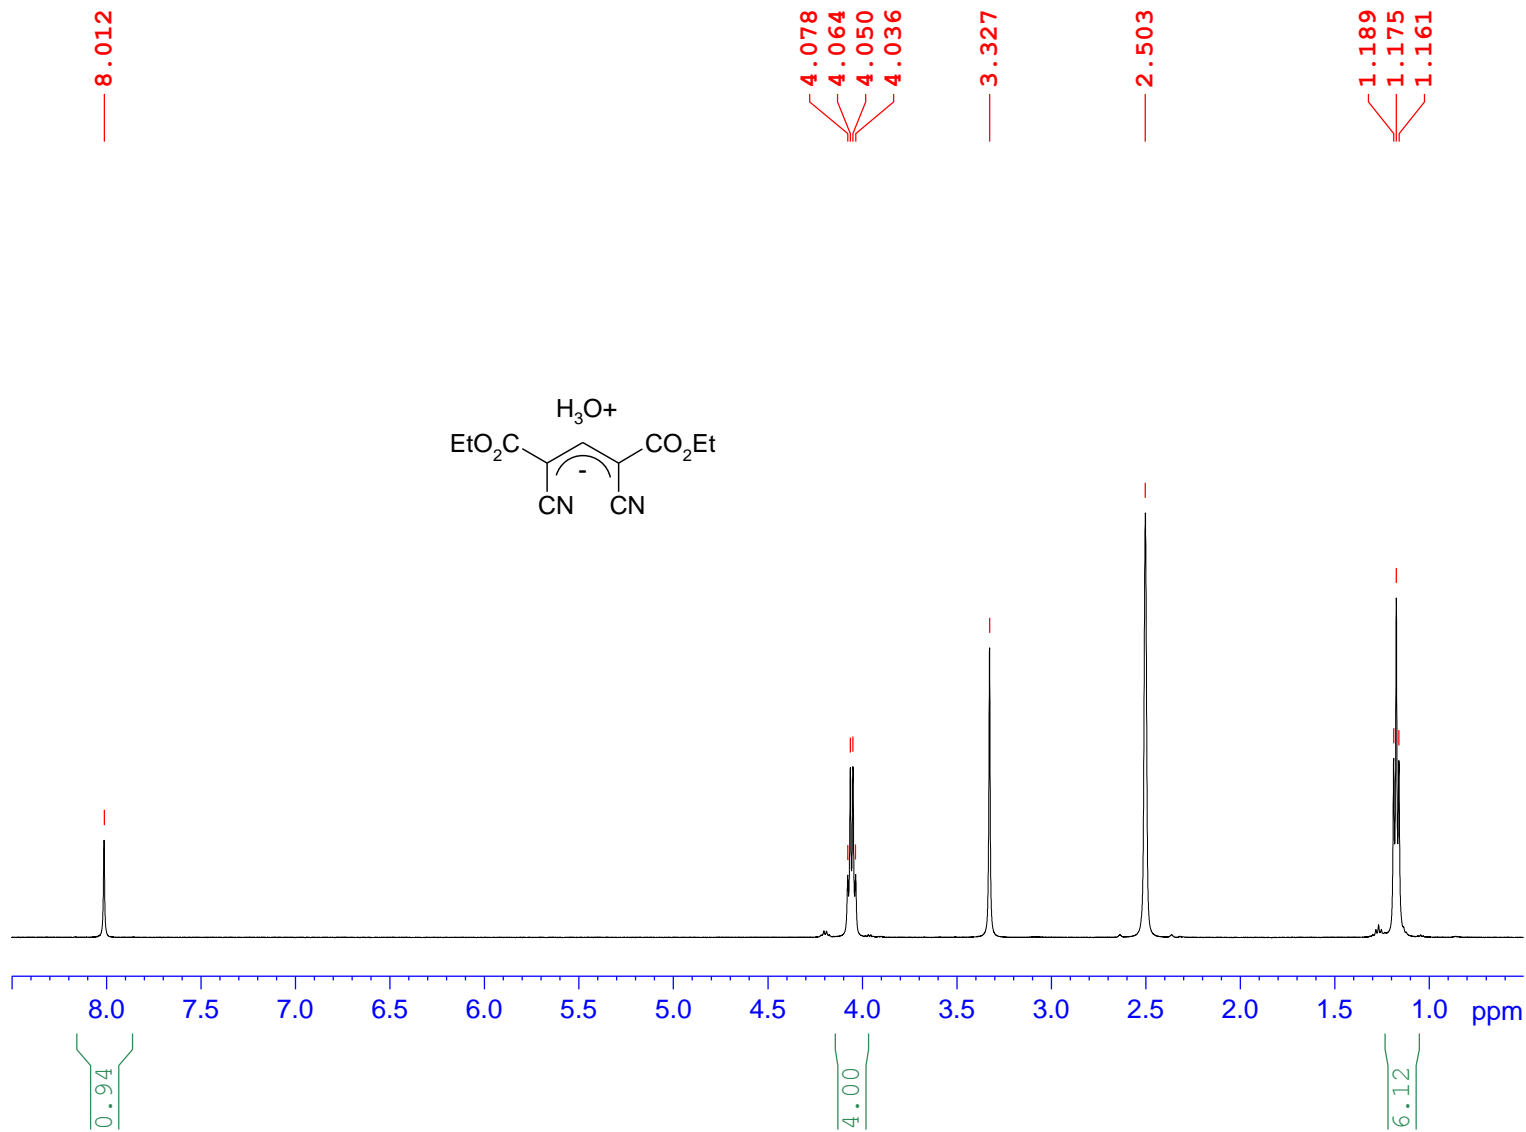

Current Data Parameters  
 NAME PMV5791  
 EXPNO 1  
 PROCNO 1

F2 - Acquisition Parameters  
 Date\_ 20150121  
 Time 19.24  
 INSTRUM AV500  
 PROBHD 5 mm PABBO BB-  
 PULPROG zg30  
 SOLVENT DMSO  
 TD 32768  
 SW 14.0019 ppm  
 O1P 6.000 ppm  
 FIDRES 0.213709 Hz  
 NS 16  
 DS 2  
 AQ 2.3396852 sec  
 RG 203  
 TE 296.5 K  
 D1 1.00000000 sec  
 TD0 1

===== CHANNEL f1 =====  
 NUC1 1H  
 P1 12.00 usec  
 PL1 1.00 dB  
 PL1W 16.10176659 W  
 SFO1 500.1330008 MHz

F2 - Processing parameters  
 SI 32768  
 SF 500.1300045 MHz  
 WDW EM  
 SSB 0  
 LB 0 Hz  
 GB 0  
 PC 4.00

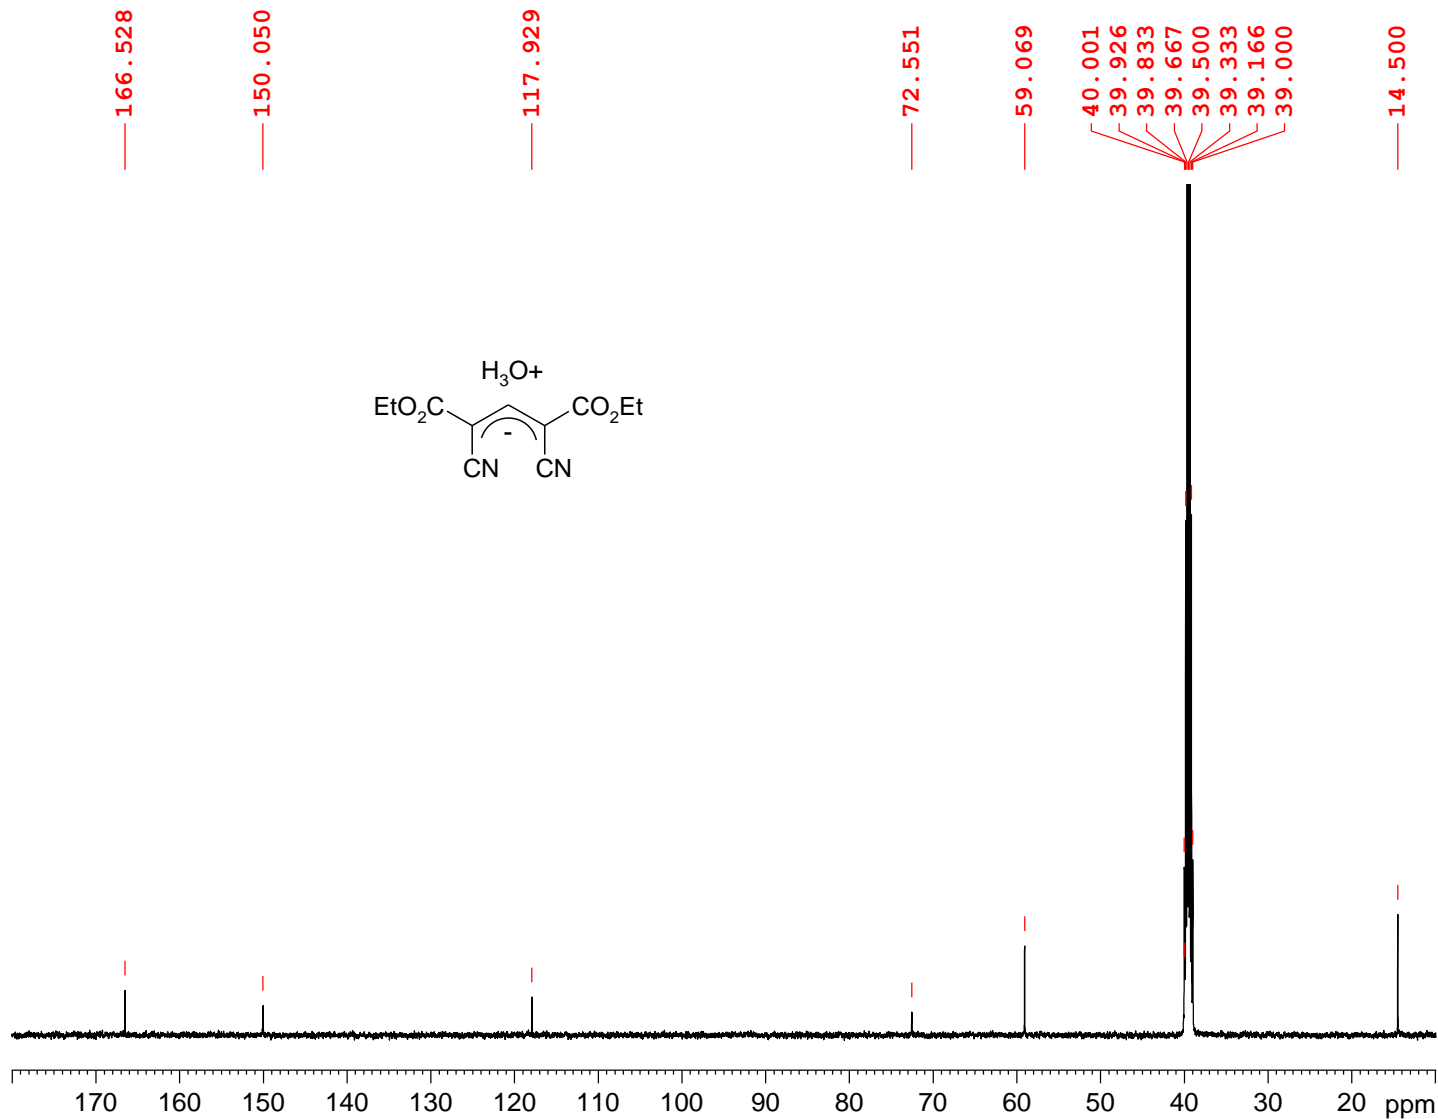

Current Data Parameters  
 NAME PMV5791  
 EXPNO 13  
 PROCNO 1

F2 - Acquisition Parameters  
 Date\_ 20150121  
 Time\_ 19.49  
 INSTRUM AV500  
 PROBHD 5 mm PABBO BB-  
 PULPROG zgpg30  
 SOLVENT DMSO  
 TD 32768  
 SW 219.2349 ppm  
 O1P 110.000 ppm  
 FIDRES 0.841477 Hz  
 NS 1024  
 DS 8  
 AQ 0.5942430 sec  
 RG 203  
 TE 297.3 K  
 D1 0.80000001 sec  
 D11 0.03000000 sec  
 TD0 1

==== CHANNEL f1 =====  
 NUC1 13C  
 P1 9.00 usec  
 PL1 0 dB  
 PL1W 115.29558563 W  
 SFO1 125.7716224 MHz

==== CHANNEL f2 =====  
 CPDPRG2 waltz16  
 NUC2 1H  
 PCPD2 75.00 usec  
 PL2 120.00 dB  
 PL12 17.00 dB  
 PL13 20.00 dB  
 PL2W 0 W  
 PL12W 0.40445811 W  
 PL13W 0.20270923 W  
 SFO2 500.1325007 MHz

F2 - Processing parameters  
 SI 65536  
 SF 125.7578563 MHz  
 WDW EM  
 SSB 0  
 LB 2.00 Hz  
 GB 0  
 PC 1.40

<sup>13</sup>C NMR (126 MHz, DMSO-d<sub>6</sub>) spectrum of 14.
